# Supplementary material for: Analysis of induced abortion-related complications in women admitted to referral health facilities in Kinshasa, Democratic Republic of the Congo
Source: PLoS One. 2018 Aug 30;13(8):e0203186. doi: 10.1371/journal.pone.0203186 (PMC6117020; doi:10.1371/journal.pone.0203186)
Supplement: S1 Database — (XLSX) [file pone.0203186.s001.xlsx]

## Sheet: Sheet1
Nom_de_l_établissement_sanitaire_enq	Type_de_quartier_de_l_établissement_san_enquêté	Date_de_recolte_de_données	Type_de_quartier_de_résid_de_la_patiente	Age_de_la_patiente	Satut_matrimonial_de_la_patiente	Mode_d_admission_de_la_patiente	Type_de_quartier_de_l_établ_qui_a_référé	Date_de_référence_de_la_patiente	Date_d_admission_de_la_patiente	Date_heure_admission_patien	Température	Pression_systolique	Gestité	Pression_diastolique	Parité	Fréquence_respiratoire	Avortement	Fréquence_cardiaque	DiaClin_Compl_d_avortement_provoqué	DiaClin_Avortement_spontané	DiaClin_Hgie_3emeTr_ou_dupostpartum_GEUR	DiaClin_Utérus_cicatriciel_RupUtérine	DiaClin_Eclapmsie_preeclampsie	DiaClin_Palu_grave_sur_grossesse	DiaClin_RPM_Infection_sur_grossesse	DiaClin_DFP_Bassin_rétréci	DiaClin_SFA_SFC	DiaClin_Dystocie_cervicale_Oedème_du_col	DiaClin_Utérus_polymyomateux_sur_grossesse	DiaClin_Autres	UniqueKey	RECSTATUS	Diagnostic_définitif	Date_de_début_de_traitement	Type_de_traitement	TraitMéd_Simple_antibiothérapie	TraitMéd_Transfusion_sanguine	TraitMéd_double_antibiothérapie	TraitMéd_Antianémiques_oraux	TraitMéd_Triple_antibiothérapie	TraitMéd_Perfusion_de_quinine	TraitMéd_Utérotonique	TraitMéd_AntiHTA_magnesium	TraitMéd_AINS	TraitMéd_Autres	Hémorragie_postpartum_Rétention_placentaire	TraitMéd_Antalgique	DiaClin_DPPNI	Diaclin_Placenta_Praevia_hémorragique
HGR de Kinkolé	Quartiers semi-ruraux	2015-02-03	Quartiers semi-ruraux	22		Patiente venue d'elle même			2014-09-21	2014-09-21 06:00:00	37	90		60					FALSE	FALSE	FALSE	FALSE	FALSE	FALSE	FALSE	FALSE	FALSE	FALSE	FALSE	FALSE	1	1	Autres diagnostics	2014-09-21	Traitement médico-chirurgical	TRUE	FALSE	FALSE	FALSE	FALSE	FALSE	TRUE	FALSE	FALSE	FALSE	TRUE	FALSE	FALSE	FALSE
HGR de Kinkolé	Quartiers semi-ruraux	2015-02-04	Quartiers semi-ruraux	29	Mariée	Patiente référée	Quartiers semi-ruraux	2014-08-24	2014-08-24				7		6		1		FALSE	FALSE	FALSE	FALSE	FALSE	FALSE	FALSE	FALSE	TRUE	FALSE	FALSE	FALSE	2	1	Autres diagnostics	2014-08-24	Traitement médico-chirurgical	FALSE	FALSE	FALSE	TRUE	FALSE	FALSE	TRUE	FALSE	FALSE	FALSE	FALSE	FALSE	FALSE	FALSE
HGR de Kinkolé	Quartiers semi-ruraux	2015-02-04	Quartiers semi-ruraux	30	Mariée	Patiente venue d'elle même			2014-08-25	2014-08-25 07:00:00	37	90	6	60	5		0		TRUE	FALSE	FALSE	FALSE	FALSE	FALSE	FALSE	FALSE	FALSE	FALSE	FALSE	FALSE	3	1	Complication d'avortement provoqué	2014-08-25	Traitement médico-chirurgical	FALSE	FALSE	FALSE	FALSE	TRUE	FALSE	FALSE	FALSE	FALSE	FALSE	FALSE	FALSE	FALSE	FALSE
HGR de Kinkolé	Quartiers semi-ruraux	2015-02-04	Quartiers semi-ruraux	32	Mariée	Patiente venue d'elle même			2014-08-20	2014-08-20 11:07:00		100	6	60	5		0		FALSE	FALSE	FALSE	FALSE	FALSE	FALSE	FALSE	FALSE	TRUE	FALSE	FALSE	FALSE	4	1	Autres diagnostics	2014-08-20	Traitement médico-chirurgical	FALSE	FALSE	TRUE	FALSE	FALSE	FALSE	TRUE	FALSE	FALSE	FALSE	FALSE	TRUE	FALSE	FALSE
HGR de Kinkolé	Quartiers semi-ruraux	2015-02-04	Quartiers des cités planifiées	27	Celibataire	Patiente venue d'elle même			2014-08-06		36.5	120	2	80	0		2		TRUE	FALSE	FALSE	FALSE	FALSE	FALSE	FALSE	FALSE	FALSE	FALSE	FALSE	FALSE	5	1	Complication d'avortement provoqué	2014-08-06	Traitement médico-chirurgical	TRUE	FALSE	FALSE	TRUE	FALSE	FALSE	TRUE	FALSE	FALSE	TRUE	FALSE	FALSE	FALSE	FALSE
HGR de Kinkolé	Quartiers semi-ruraux	2015-02-04	Quartiers semi-ruraux	38	Mariée	Patiente référée	Quartiers semi-ruraux	2014-07-19	2014-07-19	2014-07-19 07:45:00			3		2		1		FALSE	FALSE	FALSE	FALSE	FALSE	FALSE	FALSE	FALSE	FALSE	FALSE	FALSE	FALSE	6	1	Autres diagnostics	2014-07-19	Traitement médico-chirurgical	FALSE	FALSE	FALSE	FALSE	TRUE	FALSE	FALSE	FALSE	FALSE	FALSE	FALSE	FALSE	FALSE	FALSE
HGR de Kinkolé	Quartiers semi-ruraux	2015-02-04				Patiente venue d'elle même			2014-07-20										FALSE	FALSE	FALSE	FALSE	TRUE	FALSE	FALSE	FALSE	FALSE	FALSE	FALSE	FALSE	7	1	Autres diagnostics	2014-07-20	Traitement médico-chirurgical	FALSE	FALSE	TRUE	FALSE	FALSE	FALSE	TRUE	FALSE	FALSE	FALSE	FALSE	TRUE	FALSE	FALSE
HGR de Kinkolé	Quartiers semi-ruraux	2015-02-04	Quartiers semi-ruraux	17	Mariée	Patiente venue d'elle même			2014-07-21	2014-07-21 00:50:00	37	90	2	60	1		0		FALSE	FALSE	FALSE	FALSE	FALSE	FALSE	FALSE	FALSE	FALSE	FALSE	FALSE	FALSE	8	1	Autres diagnostics	2014-07-21	Traitement médico-chirurgical	FALSE	FALSE	TRUE	FALSE	FALSE	FALSE	TRUE	FALSE	TRUE	FALSE	FALSE	FALSE	FALSE	FALSE
HGR de Kinkolé	Quartiers semi-ruraux	2015-02-04	Quartiers semi-ruraux			Patiente référée	Quartiers semi-ruraux	2014-07-09	2014-07-09				2		1		0		FALSE	FALSE	FALSE	FALSE	FALSE	FALSE	FALSE	FALSE	FALSE	FALSE	FALSE	FALSE	9	1	Autres diagnostics	2014-07-09	Traitement médico-chirurgical	FALSE	FALSE	FALSE	FALSE	TRUE	FALSE	FALSE	FALSE	FALSE	FALSE	FALSE	FALSE	TRUE	FALSE
HGR de Kinkolé	Quartiers semi-ruraux	2015-02-04	Quartiers semi-ruraux	19	Mariée	Patiente venue d'elle même			2014-07-24	2014-07-24 14:25:00	38.5	120		80					FALSE	FALSE	FALSE	FALSE	FALSE	FALSE	FALSE	FALSE	TRUE	TRUE	FALSE	FALSE	10	1	Autres diagnostics	2014-07-25	Traitement médico-chirurgical	FALSE	FALSE	FALSE	FALSE	TRUE	FALSE	FALSE	FALSE	FALSE	TRUE	FALSE	FALSE	FALSE	FALSE
HGR de Kinkolé	Quartiers semi-ruraux	2015-02-04	Quartiers semi-ruraux		Mariée	Patiente référée	Quartiers semi-ruraux	2014-06-27	2014-06-27										FALSE	FALSE	FALSE	FALSE	FALSE	FALSE	FALSE	FALSE	FALSE	FALSE	FALSE	FALSE	11	1	Autres diagnostics	2014-06-27	Traitement médico-chirurgical	FALSE	FALSE	TRUE	FALSE	FALSE	FALSE	TRUE	FALSE	TRUE	FALSE	FALSE	FALSE	FALSE	FALSE
HGR de Kinkolé	Quartiers semi-ruraux	2015-02-04	Quartiers semi-ruraux	16	Mariée	Patiente venue d'elle même			2014-07-24	2014-07-24 23:15:00									FALSE	FALSE	FALSE	FALSE	FALSE	FALSE	FALSE	FALSE	FALSE	FALSE	FALSE	FALSE	12	1	Autres diagnostics	2014-07-25	Traitement médico-chirurgical	FALSE	FALSE	TRUE	FALSE	FALSE	FALSE	TRUE	FALSE	TRUE	FALSE	FALSE	FALSE	FALSE	FALSE
HGR de Kinkolé	Quartiers semi-ruraux	2015-02-04	Quartiers semi-ruraux	21	Mariée	Patiente référée	Quartiers semi-ruraux	2014-07-03	2014-07-03		36	140		90					FALSE	FALSE	FALSE	FALSE	TRUE	FALSE	FALSE	FALSE	TRUE	FALSE	FALSE	FALSE	13	1	Autres diagnostics	2014-07-03	Traitement médico-chirurgical	FALSE	FALSE	TRUE	FALSE	FALSE	FALSE	TRUE	FALSE	TRUE	FALSE	FALSE	FALSE	FALSE	FALSE
HGR de Kinkolé	Quartiers semi-ruraux	2015-02-04	Quartiers semi-ruraux	18	Mariée	Patiente venue d'elle même			2014-07-21	2014-07-21 20:48:00	36.5	100	1	60	0		0		TRUE	FALSE	FALSE	FALSE	FALSE	FALSE	FALSE	FALSE	FALSE	FALSE	FALSE	FALSE	14	1	Complication d'avortement provoqué	2014-07-27	Traitement médico-chirurgical	TRUE	FALSE	FALSE	FALSE	FALSE	FALSE	TRUE	FALSE	TRUE	FALSE	FALSE	FALSE	FALSE	FALSE
HGR de Kinkolé	Quartiers semi-ruraux	2015-02-04	Quartiers semi-ruraux	19	Mariée	Patiente référée	Quartiers semi-ruraux	2014-07-25	2014-07-25	2014-07-25 09:55:00									FALSE	FALSE	FALSE	FALSE	FALSE	FALSE	FALSE	FALSE	FALSE	FALSE	FALSE	FALSE	15	1	Autres diagnostics	2014-07-25	Traitement médico-chirurgical	FALSE	FALSE	TRUE	FALSE	FALSE	FALSE	TRUE	FALSE	FALSE	TRUE	FALSE	FALSE	FALSE	FALSE
HGR de Kinkolé	Quartiers semi-ruraux	2015-02-04	Quartiers semi-ruraux		Mariée	Patiente référée	Quartiers semi-ruraux	2014-07-30	2014-07-30			100	7	60	4		3		FALSE	FALSE	FALSE	TRUE	FALSE	FALSE	FALSE	FALSE	FALSE	FALSE	FALSE	FALSE	16	1	Autres diagnostics	2014-07-30	Traitement médico-chirurgical	FALSE	FALSE	TRUE	FALSE	FALSE	FALSE	TRUE	FALSE	FALSE	FALSE	FALSE	FALSE	FALSE	FALSE
HGR de Kinkolé	Quartiers semi-ruraux	2015-02-04	Quartiers semi-ruraux	22	Mariée	Patiente référée	Quartiers semi-ruraux	2014-07-11	2014-07-11	2014-07-11 09:50:00									FALSE	FALSE	FALSE	TRUE	FALSE	FALSE	FALSE	FALSE	FALSE	FALSE	FALSE	FALSE	17	1	Autres diagnostics	2014-07-11	Traitement médico-chirurgical	FALSE	FALSE	TRUE	FALSE	FALSE	FALSE	TRUE	FALSE	FALSE	FALSE	FALSE	FALSE	FALSE	FALSE
HGR de Kinkolé	Quartiers semi-ruraux	2015-02-04	Quartiers semi-ruraux	20	Mariée	Patiente référée		2014-07-14	2014-07-14		36	100		90				80	FALSE	FALSE	FALSE	FALSE	TRUE	FALSE	FALSE	FALSE	TRUE	FALSE	FALSE	FALSE	18	1	Autres diagnostics	2014-07-15	Traitement médico-chirurgical	FALSE	FALSE	TRUE	FALSE	FALSE	FALSE	FALSE	FALSE	TRUE	FALSE	FALSE	TRUE	FALSE	FALSE
HGR de Kinkolé	Quartiers semi-ruraux	2015-02-04	Quartiers semi-ruraux	19		Patiente venue d'elle même			2014-06-20		36	80	1	70	0		1	120	TRUE	FALSE	FALSE	FALSE	FALSE	FALSE	FALSE	FALSE	FALSE	FALSE	FALSE	FALSE	19	1	Complication d'avortement provoqué	2014-06-20	Traitement médico-chirurgical	TRUE	FALSE	FALSE	TRUE	FALSE	FALSE	FALSE	FALSE	FALSE	FALSE	FALSE	FALSE	FALSE	FALSE
HGR de Kinkolé	Quartiers semi-ruraux	2015-02-04	Quartiers semi-ruraux	25		Patiente venue d'elle même			2014-06-11	2014-06-11 20:15:00	36		3		2		1		TRUE	FALSE	FALSE	FALSE	FALSE	FALSE	FALSE	FALSE	FALSE	FALSE	FALSE	FALSE	20	1	Complication d'avortement provoqué	2014-06-11	Traitement médico-chirurgical	TRUE	FALSE	FALSE	FALSE	FALSE	FALSE	FALSE	FALSE	FALSE	TRUE	FALSE	FALSE	FALSE	FALSE
HGR de Kinkolé	Quartiers semi-ruraux	2015-02-04		35	Mariée	Patiente référée		2014-06-26	2014-06-29				5		4		1		TRUE	FALSE	FALSE	FALSE	FALSE	FALSE	FALSE	FALSE	FALSE	FALSE	FALSE	FALSE	21	1	Complication d'avortement provoqué	2014-06-29	Traitement médico-chirurgical	FALSE	FALSE	TRUE	FALSE	FALSE	FALSE	TRUE	FALSE	FALSE	FALSE	FALSE	FALSE	FALSE	FALSE
HGR de Kinkolé	Quartiers semi-ruraux	2015-02-04	Quartiers semi-ruraux	37		Patiente venue d'elle même			2014-06-11	2014-06-11 06:00:00			5		5		0		FALSE	FALSE	FALSE	FALSE	FALSE	FALSE	FALSE	FALSE	FALSE	FALSE	FALSE	FALSE	22	1	Autres diagnostics	2014-06-11	Traitement médico-chirurgical	FALSE	FALSE	TRUE	FALSE	FALSE	FALSE	TRUE	FALSE	TRUE	FALSE	FALSE	FALSE	FALSE	TRUE
HGR de Kinkolé	Quartiers semi-ruraux	2015-02-04	Quartiers semi-ruraux	30	Mariée	Patiente référée		2014-06-04	2014-06-04	2014-06-04 15:22:00	37.2	100	5	50	5		0		FALSE	FALSE	FALSE	FALSE	FALSE	FALSE	FALSE	FALSE	TRUE	FALSE	FALSE	FALSE	23	1	Autres diagnostics	2014-06-04	Traitement médico-chirurgical	TRUE	FALSE	FALSE	FALSE	FALSE	FALSE	FALSE	FALSE	FALSE	FALSE	FALSE	TRUE	FALSE	FALSE
HGR de Kinkolé	Quartiers semi-ruraux	2015-02-04	Quartiers semi-ruraux	39		Patiente référée		2014-05-04	2014-05-04	2014-05-05 18:14:00			6		5		1		TRUE	FALSE	FALSE	FALSE	FALSE	FALSE	FALSE	FALSE	FALSE	FALSE	FALSE	FALSE	24	1	Complication d'avortement provoqué	2014-05-05	Traitement médico-chirurgical	FALSE	FALSE	TRUE	FALSE	FALSE	FALSE	TRUE	FALSE	FALSE	FALSE	FALSE	TRUE	FALSE	FALSE
HGR de Kinkolé	Quartiers semi-ruraux	2015-02-04	Quartiers semi-ruraux	32	Mariée	Patiente venue d'elle même			2014-05-28	2014-05-28 03:23:00			6		5		1		FALSE	FALSE	FALSE	FALSE	FALSE	FALSE	FALSE	FALSE	FALSE	FALSE	FALSE	FALSE	25	1	Autres diagnostics	2014-05-28	Traitement médico-chirurgical	FALSE	FALSE	FALSE	FALSE	FALSE	FALSE	FALSE	FALSE	FALSE	TRUE	FALSE	FALSE	FALSE	FALSE
HGR de Kinkolé	Quartiers semi-ruraux	2015-02-03	Quartiers semi-ruraux	23	Celibataire	Patiente référée	Quartiers semi-ruraux	2014-05-01	2014-05-01	2014-05-01 03:00:00	36	120	1	80	0		1		FALSE	TRUE	FALSE	FALSE	FALSE	FALSE	FALSE	FALSE	FALSE	FALSE	FALSE	FALSE	26	1	Avortement spontané	2014-05-01	Traitement médical	FALSE	FALSE	FALSE	TRUE	FALSE	FALSE	FALSE	FALSE	FALSE	TRUE	FALSE	FALSE	FALSE	FALSE
HGR de Kinkolé	Quartiers semi-ruraux	2015-02-05	Quartiers semi-ruraux	21		DND			2014-08-29										TRUE	FALSE	FALSE	FALSE	FALSE	FALSE	FALSE	FALSE	FALSE	FALSE	FALSE	FALSE	27	1	Complication d'avortement provoqué	2014-08-29	Traitement médico-chirurgical	FALSE	FALSE	FALSE	FALSE	FALSE	FALSE	FALSE	FALSE	FALSE	TRUE	FALSE	FALSE	FALSE	FALSE
HGR de Kinkolé	Quartiers semi-ruraux	2015-02-05	Quartiers semi-ruraux	30		DND			2014-08-25										TRUE	FALSE	FALSE	FALSE	FALSE	FALSE	FALSE	FALSE	FALSE	FALSE	FALSE	FALSE	28	1	Complication d'avortement provoqué	2014-08-25	Traitement médico-chirurgical	FALSE	FALSE	FALSE	FALSE	FALSE	FALSE	FALSE	FALSE	FALSE	FALSE	FALSE	FALSE	FALSE	FALSE
HGR de Kinkolé	Quartiers semi-ruraux	2015-02-05	Quartiers semi-ruraux	23		DND			2014-08-27										TRUE	FALSE	FALSE	FALSE	FALSE	FALSE	FALSE	FALSE	FALSE	FALSE	FALSE	FALSE	29	1	Complication d'avortement provoqué	2014-08-27	Traitement médico-chirurgical	FALSE	FALSE	FALSE	FALSE	FALSE	FALSE	FALSE	FALSE	FALSE	FALSE	FALSE	FALSE	FALSE	FALSE
HGR de Kinkolé	Quartiers semi-ruraux	2015-02-05	Quartiers semi-ruraux	17		DND			2014-08-16										FALSE	FALSE	FALSE	FALSE	FALSE	FALSE	FALSE	FALSE	TRUE	FALSE	FALSE	FALSE	30	1	Autres diagnostics	2014-08-16	Traitement médico-chirurgical	FALSE	FALSE	FALSE	FALSE	FALSE	FALSE	FALSE	FALSE	FALSE	FALSE	FALSE	FALSE	FALSE	FALSE
HGR de Kinkolé	Quartiers semi-ruraux	2015-02-05	Quartiers semi-ruraux	17		DND			2014-08-11										FALSE	FALSE	FALSE	FALSE	FALSE	FALSE	FALSE	FALSE	FALSE	FALSE	FALSE	FALSE	31	1	Autres diagnostics	2014-08-11	Traitement médico-chirurgical	FALSE	FALSE	FALSE	FALSE	FALSE	FALSE	FALSE	FALSE	FALSE	TRUE	TRUE	FALSE	FALSE	FALSE
HGR de Kinkolé	Quartiers semi-ruraux	2015-02-05	Quartiers semi-ruraux	38		DND			2014-08-10										FALSE	FALSE	FALSE	FALSE	FALSE	TRUE	FALSE	FALSE	FALSE	FALSE	FALSE	FALSE	32	1	Autres diagnostics	2014-08-10	Traitement médico-chirurgical	FALSE	FALSE	FALSE	FALSE	FALSE	FALSE	FALSE	FALSE	FALSE	TRUE	FALSE	TRUE	FALSE	FALSE
HGR de Kinkolé	Quartiers semi-ruraux	2015-02-05	Quartiers semi-ruraux			DND			2014-08-04										FALSE	FALSE	FALSE	FALSE	TRUE	TRUE	FALSE	FALSE	FALSE	FALSE	FALSE	FALSE	33	1	Autres diagnostics	2014-08-04	Traitement médical	FALSE	FALSE	FALSE	FALSE	FALSE	FALSE	FALSE	FALSE	FALSE	TRUE	FALSE	FALSE	FALSE	FALSE
HGR de Kinkolé	Quartiers semi-ruraux	2015-02-05	Quartiers semi-ruraux	34		DND			2014-11-26										FALSE	TRUE	FALSE	FALSE	FALSE	TRUE	FALSE	FALSE	FALSE	FALSE	FALSE	FALSE	34	1	Autres diagnostics	2014-11-26	Traitement médical	TRUE	FALSE	FALSE	FALSE	FALSE	FALSE	TRUE	FALSE	FALSE	TRUE	FALSE	FALSE	FALSE	FALSE
HGR de Kinkolé	Quartiers semi-ruraux	2015-02-05	Quartiers semi-ruraux	36		DND			2014-11-25										FALSE	FALSE	FALSE	FALSE	FALSE	TRUE	FALSE	FALSE	FALSE	FALSE	FALSE	FALSE	35	1	Autres diagnostics	2014-11-25	Traitement médical	TRUE	FALSE	FALSE	TRUE	FALSE	FALSE	FALSE	FALSE	FALSE	TRUE	FALSE	FALSE	FALSE	FALSE
HGR de Kinkolé	Quartiers semi-ruraux	2015-02-05	Quartiers semi-ruraux	34		DND			2014-11-26										FALSE	TRUE	FALSE	FALSE	FALSE	FALSE	FALSE	FALSE	FALSE	FALSE	FALSE	FALSE	36	1	Avortement spontané	2014-11-26	Traitement médico-chirurgical	FALSE	FALSE	FALSE	FALSE	FALSE	FALSE	FALSE	FALSE	FALSE	FALSE	FALSE	FALSE	FALSE	FALSE
HGR de Kinkolé	Quartiers semi-ruraux	2015-02-05	Quartiers des cités planifiées	17		DND			2014-11-21										TRUE	FALSE	FALSE	FALSE	FALSE	FALSE	FALSE	FALSE	FALSE	FALSE	FALSE	FALSE	37	1	Complication d'avortement provoqué	2014-11-21	Traitement médico-chirurgical	FALSE	FALSE	FALSE	FALSE	FALSE	FALSE	FALSE	FALSE	FALSE	FALSE	FALSE	FALSE	FALSE	FALSE
HGR de Kinkolé	Quartiers semi-ruraux	2015-02-05	Quartiers semi-ruraux	49		DND			2014-11-09										FALSE	FALSE	FALSE	FALSE	FALSE	FALSE	FALSE	FALSE	FALSE	FALSE	FALSE	FALSE	38	1	Autres diagnostics	2014-11-09	Traitement médical	FALSE	FALSE	FALSE	TRUE	FALSE	FALSE	FALSE	FALSE	FALSE	TRUE	TRUE	FALSE	FALSE	FALSE
HGR de Kinkolé	Quartiers semi-ruraux	2015-02-05	Quartiers semi-ruraux	20		DND			2014-11-15										FALSE	FALSE	FALSE	FALSE	TRUE	FALSE	FALSE	FALSE	FALSE	FALSE	FALSE	FALSE	39	1	Autres diagnostics	2014-11-15	Traitement médical	FALSE	FALSE	FALSE	FALSE	FALSE	FALSE	FALSE	TRUE	FALSE	FALSE	FALSE	FALSE	FALSE	FALSE
HGR de Kinkolé	Quartiers semi-ruraux	2015-02-05	Quartiers semi-ruraux	27		DND			2014-11-16										FALSE	FALSE	FALSE	FALSE	FALSE	FALSE	FALSE	FALSE	FALSE	FALSE	FALSE	FALSE	40	1	Autres diagnostics	2014-11-16	Traitement médico-chirurgical	FALSE	TRUE	FALSE	FALSE	FALSE	FALSE	FALSE	FALSE	FALSE	FALSE	TRUE	FALSE	FALSE	FALSE
HGR de Kinkolé	Quartiers semi-ruraux	2015-02-05	Quartiers semi-ruraux	23		DND			2014-11-11										FALSE	FALSE	FALSE	FALSE	FALSE	TRUE	FALSE	FALSE	FALSE	FALSE	FALSE	FALSE	41	1	Autres diagnostics	2014-11-11	Traitement médical	FALSE	TRUE	FALSE	FALSE	FALSE	TRUE	FALSE	FALSE	FALSE	FALSE	FALSE	FALSE	FALSE	FALSE
HGR de Kinkolé	Quartiers semi-ruraux	2015-02-05	Quartiers semi-ruraux	15		DND			2014-11-07										FALSE	FALSE	FALSE	FALSE	TRUE	FALSE	FALSE	FALSE	FALSE	FALSE	FALSE	FALSE	42	1	Autres diagnostics	2014-11-07	Traitement médical	FALSE	FALSE	FALSE	FALSE	FALSE	FALSE	FALSE	TRUE	FALSE	TRUE	FALSE	FALSE	FALSE	FALSE
HGR de Kinkolé	Quartiers semi-ruraux	2015-02-05	Quartiers semi-ruraux	23		DND			2014-11-11										FALSE	FALSE	FALSE	FALSE	FALSE	TRUE	FALSE	FALSE	FALSE	FALSE	FALSE	FALSE	43	1	Autres diagnostics	2014-11-11	Traitement médical	FALSE	TRUE	FALSE	FALSE	FALSE	TRUE	FALSE	FALSE	FALSE	FALSE	FALSE	FALSE	FALSE	FALSE
HGR de Kinkolé	Quartiers semi-ruraux	2015-02-05	Quartiers semi-ruraux	29		DND			2014-11-07										FALSE	FALSE	FALSE	FALSE	TRUE	FALSE	FALSE	FALSE	FALSE	FALSE	FALSE	FALSE	44	1	Autres diagnostics	2014-11-07	Traitement médical	FALSE	FALSE	FALSE	FALSE	FALSE	FALSE	FALSE	TRUE	FALSE	FALSE	FALSE	FALSE	FALSE	FALSE
HGR de Kinkolé	Quartiers semi-ruraux	2015-02-05	Quartiers semi-ruraux						2014-11-11										FALSE	FALSE	FALSE	FALSE	FALSE	FALSE	FALSE	FALSE	FALSE	FALSE	FALSE	TRUE	45	1	Autres diagnostics	2014-11-11	Traitement médical	FALSE	FALSE	FALSE	FALSE	FALSE	FALSE	FALSE	FALSE	FALSE	TRUE	FALSE	FALSE	FALSE	FALSE
HGR de Kinkolé	Quartiers semi-ruraux	2015-02-05	Quartiers semi-ruraux	42		DND			2014-11-07										FALSE	FALSE	FALSE	FALSE	FALSE	FALSE	FALSE	FALSE	FALSE	FALSE	FALSE	FALSE	46	1	Autres diagnostics	2014-11-07	Traitement médico-chirurgical	FALSE	FALSE	FALSE	FALSE	FALSE	FALSE	FALSE	FALSE	FALSE	TRUE	FALSE	FALSE	FALSE	TRUE
HGR de Kinkolé	Quartiers semi-ruraux	2015-02-05	Quartiers semi-ruraux	38		DND			2014-11-04										FALSE	FALSE	FALSE	FALSE	FALSE	TRUE	FALSE	FALSE	FALSE	FALSE	FALSE	FALSE	47	1	Autres diagnostics	2014-11-04	Traitement médical	TRUE	FALSE	FALSE	FALSE	FALSE	TRUE	FALSE	FALSE	FALSE	TRUE	FALSE	FALSE	FALSE	FALSE
HGR de Kinkolé	Quartiers semi-ruraux	2015-02-05	Quartiers semi-ruraux	18		DND			2014-10-20										TRUE	FALSE	FALSE	FALSE	FALSE	FALSE	FALSE	FALSE	FALSE	FALSE	FALSE	FALSE	48	1	Complication d'avortement provoqué	2014-10-29	Traitement médico-chirurgical	FALSE	FALSE	FALSE	FALSE	FALSE	FALSE	FALSE	FALSE	FALSE	FALSE	FALSE	FALSE	FALSE	FALSE
HGR de Kinkolé	Quartiers semi-ruraux	2015-02-05	Quartiers excentriques et d'extension	35		DND			2014-08-31										FALSE	FALSE	FALSE	FALSE	FALSE	FALSE	FALSE	FALSE	TRUE	FALSE	FALSE	FALSE	49	1	Autres diagnostics	2014-08-31	Traitement médico-chirurgical	FALSE	FALSE	FALSE	FALSE	FALSE	FALSE	FALSE	FALSE	FALSE	FALSE	FALSE	FALSE	FALSE	FALSE
HGR de Kinkolé	Quartiers semi-ruraux	2015-02-05	Quartiers excentriques et d'extension			DND			2014-10-15										TRUE	FALSE	FALSE	FALSE	FALSE	FALSE	FALSE	FALSE	FALSE	FALSE	FALSE	FALSE	50	1	Complication d'avortement provoqué	2014-10-15		FALSE	FALSE	FALSE	FALSE	FALSE	FALSE	FALSE	FALSE	FALSE	FALSE	FALSE	FALSE	FALSE	FALSE
HGR de Kinkolé	Quartiers semi-ruraux	2015-02-05	Quartiers semi-ruraux	42					2014-10-13										FALSE	FALSE	FALSE	FALSE	FALSE	TRUE	FALSE	FALSE	FALSE	FALSE	FALSE	FALSE	51	1	Autres diagnostics	2014-10-13	Traitement médical	TRUE	TRUE	FALSE	FALSE	FALSE	FALSE	FALSE	FALSE	FALSE	TRUE	FALSE	FALSE	FALSE	FALSE
HGR de Kinkolé	Quartiers semi-ruraux	2015-02-05	Quartiers semi-ruraux	38		DND			2014-10-10										FALSE	TRUE	FALSE	FALSE	FALSE	FALSE	FALSE	FALSE	FALSE	FALSE	FALSE	FALSE	52	1	Avortement spontané	2014-10-10	Traitement médico-chirurgical	TRUE	FALSE	FALSE	FALSE	FALSE	FALSE	TRUE	FALSE	FALSE	FALSE	FALSE	FALSE	FALSE	FALSE
HGR de Kinkolé	Quartiers semi-ruraux	2015-02-05	Quartiers semi-ruraux	32		DND			2014-10-14										FALSE	FALSE	FALSE	FALSE	FALSE	TRUE	FALSE	FALSE	FALSE	FALSE	FALSE	FALSE	53	1	Autres diagnostics	2014-10-14	Traitement médical	TRUE	TRUE	FALSE	FALSE	FALSE	TRUE	FALSE	FALSE	FALSE	FALSE	FALSE	FALSE	FALSE	FALSE
HGR de Kinkolé	Quartiers semi-ruraux	2015-02-05	Quartiers des cités planifiées	32		DND			2014-10-10										FALSE	FALSE	FALSE	FALSE	FALSE	TRUE	FALSE	FALSE	FALSE	FALSE	FALSE	FALSE	54	1	Autres diagnostics	2014-10-10	Traitement médical	FALSE	FALSE	FALSE	FALSE	FALSE	FALSE	FALSE	FALSE	FALSE	TRUE	FALSE	FALSE	FALSE	FALSE
HGR de Kinkolé	Quartiers semi-ruraux	2015-02-05	Quartiers semi-ruraux	28		DND			2014-10-08										TRUE	FALSE	FALSE	FALSE	FALSE	FALSE	FALSE	FALSE	FALSE	FALSE	FALSE	FALSE	55	1	Complication d'avortement provoqué	2014-10-08	Traitement médical	FALSE	FALSE	FALSE	FALSE	FALSE	FALSE	TRUE	FALSE	FALSE	TRUE	FALSE	FALSE	FALSE	FALSE
HGR de Kinkolé	Quartiers semi-ruraux	2015-02-05	Quartiers semi-ruraux	37		DND			2014-10-07										FALSE	TRUE	FALSE	FALSE	FALSE	FALSE	FALSE	FALSE	FALSE	FALSE	FALSE	FALSE	57	1	Avortement spontané	2014-10-07	Traitement médico-chirurgical	FALSE	FALSE	FALSE	FALSE	FALSE	FALSE	FALSE	FALSE	FALSE	FALSE	FALSE	FALSE	FALSE	FALSE
HGR de Kinkolé	Quartiers semi-ruraux	2015-02-05	Quartiers semi-ruraux	30					2014-10-01										TRUE	FALSE	FALSE	FALSE	FALSE	FALSE	FALSE	FALSE	FALSE	FALSE	FALSE	FALSE	58	1	Complication d'avortement provoqué	2014-10-01	Traitement médico-chirurgical	FALSE	FALSE	FALSE	FALSE	FALSE	FALSE	FALSE	FALSE	FALSE	FALSE	FALSE	FALSE	FALSE	FALSE
HGR de Kinkolé	Quartiers semi-ruraux	2015-02-05	Quartiers semi-ruraux	15		DND			2014-10-05										FALSE	FALSE	FALSE	FALSE	FALSE	FALSE	FALSE	FALSE	FALSE	FALSE	FALSE	FALSE	59	1	Autres diagnostics	2014-10-05	Traitement médico-chirurgical	FALSE	TRUE	FALSE	FALSE	FALSE	FALSE	FALSE	FALSE	FALSE	FALSE	TRUE	FALSE	FALSE	FALSE
HGR de Kinkolé	Quartiers semi-ruraux	2015-02-05	Quartiers semi-ruraux	27		DND			2014-10-07										FALSE	TRUE	FALSE	FALSE	FALSE	FALSE	FALSE	FALSE	FALSE	FALSE	FALSE	FALSE	60	1	Avortement spontané	2014-10-07	Traitement médical	TRUE	FALSE	FALSE	FALSE	FALSE	TRUE	FALSE	FALSE	FALSE	TRUE	FALSE	FALSE	FALSE	FALSE
HGR de Kinkolé	Quartiers semi-ruraux	2015-02-05	Quartiers semi-ruraux	35		DND			2014-10-06										FALSE	TRUE	FALSE	FALSE	FALSE	FALSE	FALSE	FALSE	FALSE	FALSE	FALSE	FALSE	61	1	Avortement spontané	2014-10-06	Traitement médico-chirurgical	TRUE	FALSE	FALSE	FALSE	FALSE	FALSE	TRUE	FALSE	FALSE	TRUE	FALSE	FALSE	FALSE	FALSE
HGR de Kinkolé	Quartiers semi-ruraux	2015-02-05	Quartiers semi-ruraux	32		DND			2014-09-30										FALSE	FALSE	FALSE	FALSE	TRUE	FALSE	FALSE	FALSE	FALSE	FALSE	FALSE	FALSE	62	1	Autres diagnostics	2014-09-30	Traitement médical	FALSE	FALSE	FALSE	FALSE	FALSE	FALSE	FALSE	TRUE	FALSE	FALSE	FALSE	FALSE	FALSE	FALSE
HGR de Kinkolé	Quartiers semi-ruraux	2015-02-05	Quartiers semi-ruraux	33		DND			2014-09-28										FALSE	FALSE	FALSE	FALSE	FALSE	TRUE	FALSE	FALSE	FALSE	FALSE	FALSE	FALSE	63	1	Autres diagnostics	2014-09-28	Traitement médical	TRUE	FALSE	FALSE	FALSE	FALSE	TRUE	FALSE	FALSE	FALSE	TRUE	FALSE	FALSE	FALSE	FALSE
HGR de Kinkolé	Quartiers semi-ruraux	2015-02-05	Quartiers excentriques et d'extension	43		DND			2014-09-23										FALSE	FALSE	FALSE	FALSE	FALSE	TRUE	FALSE	FALSE	FALSE	FALSE	FALSE	FALSE	64	1	Autres diagnostics	2014-09-23	Traitement médical	FALSE	FALSE	FALSE	FALSE	FALSE	FALSE	FALSE	FALSE	FALSE	TRUE	FALSE	FALSE	FALSE	FALSE
HGR de Kinkolé	Quartiers semi-ruraux	2015-02-05	Quartiers semi-ruraux	30		DND			2014-09-23										FALSE	FALSE	FALSE	FALSE	FALSE	TRUE	FALSE	FALSE	FALSE	FALSE	FALSE	FALSE	65	1	Autres diagnostics	2014-09-23	Traitement médical	FALSE	FALSE	FALSE	FALSE	FALSE	FALSE	FALSE	FALSE	FALSE	TRUE	FALSE	FALSE	FALSE	FALSE
HGR de Kinkolé	Quartiers semi-ruraux	2015-02-05	Quartiers semi-ruraux	22					2014-09-22										FALSE	TRUE	FALSE	FALSE	FALSE	FALSE	FALSE	FALSE	FALSE	FALSE	FALSE	FALSE	66	1	Avortement spontané	2014-09-22	Traitement médico-chirurgical	FALSE	FALSE	FALSE	FALSE	FALSE	FALSE	FALSE	FALSE	FALSE	FALSE	FALSE	FALSE	FALSE	FALSE
HGR de Kinkolé	Quartiers semi-ruraux	2015-02-05	Quartiers semi-ruraux	28					2014-09-16										FALSE	FALSE	FALSE	TRUE	FALSE	FALSE	FALSE	FALSE	FALSE	FALSE	FALSE	FALSE	67	1	Autres diagnostics			FALSE	FALSE	FALSE	FALSE	FALSE	FALSE	FALSE	FALSE	FALSE	FALSE	FALSE	FALSE	FALSE	FALSE
HGR de Kinkolé	Quartiers semi-ruraux	2015-02-05	Quartiers semi-ruraux	24					2014-09-14										FALSE	FALSE	FALSE	FALSE	FALSE	FALSE	FALSE	FALSE	TRUE	FALSE	FALSE	FALSE	68	1	Autres diagnostics	2014-09-14	Traitement médico-chirurgical	FALSE	FALSE	FALSE	FALSE	FALSE	FALSE	FALSE	FALSE	FALSE	FALSE	FALSE	FALSE	FALSE	FALSE
HGR de Kinkolé	Quartiers semi-ruraux	2015-02-05	Quartiers semi-ruraux	30		DND			2014-09-12										TRUE	FALSE	FALSE	FALSE	FALSE	FALSE	FALSE	FALSE	FALSE	FALSE	FALSE	FALSE	69	1	Complication d'avortement provoqué	2014-02-12	Traitement médico-chirurgical	FALSE	FALSE	FALSE	FALSE	FALSE	FALSE	FALSE	FALSE	FALSE	TRUE	FALSE	FALSE	FALSE	FALSE
HGR de Kinkolé	Quartiers semi-ruraux	2015-02-05	Quartiers semi-ruraux	25					2014-09-09										TRUE	FALSE	FALSE	FALSE	FALSE	FALSE	FALSE	FALSE	FALSE	FALSE	FALSE	FALSE	70	1	Complication d'avortement provoqué	2014-09-09	Traitement médico-chirurgical	FALSE	FALSE	FALSE	FALSE	FALSE	FALSE	FALSE	FALSE	FALSE	FALSE	FALSE	FALSE	FALSE	FALSE
HGR de Kinkolé	Quartiers semi-ruraux	2015-02-05	Quartiers semi-ruraux	27					2014-09-09										FALSE	TRUE	FALSE	FALSE	FALSE	FALSE	FALSE	FALSE	FALSE	FALSE	FALSE	FALSE	71	1	Avortement spontané	2014-09-09	Traitement médico-chirurgical	FALSE	FALSE	FALSE	FALSE	FALSE	FALSE	FALSE	FALSE	FALSE	FALSE	FALSE	FALSE	FALSE	FALSE
HGR de Kinkolé	Quartiers semi-ruraux	2015-02-05	Quartiers semi-ruraux	28		DND			2014-09-04										FALSE	TRUE	FALSE	FALSE	FALSE	FALSE	FALSE	FALSE	FALSE	FALSE	FALSE	FALSE	72	1	Avortement spontané	2014-09-04	Traitement médico-chirurgical	FALSE	FALSE	FALSE	FALSE	FALSE	FALSE	FALSE	FALSE	FALSE	FALSE	FALSE	FALSE	FALSE	FALSE
HGR de Bumbu	Quartiers excentriques et d'extension	2015-02-06		23		Patiente référée			2014-01-13		36	110	0	70	0		0		FALSE	FALSE	FALSE	FALSE	FALSE	FALSE	FALSE	FALSE	FALSE	FALSE	TRUE	FALSE	73	1	Autres diagnostics	2014-01-13	Traitement médico-chirurgical	FALSE	FALSE	TRUE	FALSE	FALSE	FALSE	TRUE	FALSE	TRUE	FALSE	FALSE	FALSE	FALSE	FALSE
HGR de Bumbu	Quartiers excentriques et d'extension	2015-02-06		42		Patiente venue d'elle même			2014-01-10		36	100		60		22		82	FALSE	FALSE	FALSE	FALSE	FALSE	FALSE	FALSE	FALSE	FALSE	FALSE	FALSE	FALSE	74	1	Autres diagnostics	2014-01-10	Traitement médico-chirurgical	FALSE	FALSE	TRUE	FALSE	FALSE	FALSE	TRUE	FALSE	TRUE	FALSE	FALSE	FALSE	FALSE	TRUE
HGR de Bumbu	Quartiers excentriques et d'extension	2015-02-06	Quartiers excentriques et d'extension	22		Patiente venue d'elle même			2014-01-01		36	100	2	60	1		1		FALSE	FALSE	FALSE	FALSE	FALSE	FALSE	FALSE	FALSE	TRUE	FALSE	FALSE	FALSE	75	1	Autres diagnostics	2014-01-01	Traitement médico-chirurgical	FALSE	FALSE	TRUE	FALSE	FALSE	FALSE	TRUE	FALSE	TRUE	TRUE	FALSE	FALSE	FALSE	FALSE
HGR de Bumbu	Quartiers excentriques et d'extension	2015-02-06	Quartiers excentriques et d'extension	24					2014-01-21		36	100	1	60	0		0		FALSE	FALSE	FALSE	FALSE	FALSE	FALSE	FALSE	FALSE	FALSE	FALSE	FALSE	FALSE	76	1	Autres diagnostics	2014-01-21	Traitement médico-chirurgical	FALSE	FALSE	TRUE	FALSE	FALSE	FALSE	TRUE	FALSE	TRUE	TRUE	FALSE	FALSE	FALSE	FALSE
HGR de Bumbu	Quartiers excentriques et d'extension	2015-02-06	Quartiers résidentiels	19		Patiente venue d'elle même			2014-01-20	2014-01-20 10:30:00	36	100	2	60	1		1	80	FALSE	FALSE	FALSE	FALSE	FALSE	FALSE	TRUE	FALSE	TRUE	FALSE	FALSE	FALSE	77	1	Autres diagnostics	2014-01-20	Traitement médico-chirurgical	FALSE	FALSE	TRUE	FALSE	FALSE	FALSE	TRUE	FALSE	TRUE	FALSE	FALSE	FALSE	FALSE	FALSE
HGR de Bumbu	Quartiers excentriques et d'extension	2015-02-06		24		Patiente venue d'elle même			2014-01-09	2014-01-09 02:00:00			3		2		0		FALSE	FALSE	FALSE	TRUE	FALSE	FALSE	FALSE	FALSE	TRUE	FALSE	FALSE	FALSE	78	1	Autres diagnostics	2014-01-09	Traitement médico-chirurgical	FALSE	FALSE	TRUE	FALSE	FALSE	FALSE	TRUE	FALSE	TRUE	FALSE	FALSE	FALSE	FALSE	FALSE
HGR de Bumbu	Quartiers excentriques et d'extension	2015-02-06	Quartiers excentriques et d'extension	30		Patiente venue d'elle même			2014-02-19		36	100	8	60	7		0	80	FALSE	FALSE	FALSE	FALSE	FALSE	FALSE	FALSE	FALSE	FALSE	FALSE	FALSE	FALSE	79	1	Autres diagnostics	2014-02-19	Traitement médico-chirurgical	FALSE	FALSE	TRUE	FALSE	FALSE	FALSE	TRUE	FALSE	TRUE	TRUE	FALSE	FALSE	FALSE	FALSE
HGR de Bumbu	Quartiers excentriques et d'extension	2015-02-06	Quartiers excentriques et d'extension	26		Patiente venue d'elle même			2014-02-14	2014-02-14 23:58:00	36	90	2	60	1		0	80	FALSE	FALSE	FALSE	TRUE	FALSE	FALSE	FALSE	FALSE	FALSE	FALSE	FALSE	FALSE	80	1	Autres diagnostics	2014-02-14	Traitement médico-chirurgical	FALSE	FALSE	TRUE	FALSE	FALSE	FALSE	TRUE	FALSE	FALSE	TRUE	FALSE	TRUE	FALSE	FALSE
HGR de Bumbu	Quartiers excentriques et d'extension	2015-02-06	Quartiers excentriques et d'extension	27		Patiente venue d'elle même			2014-01-15										FALSE	FALSE	FALSE	FALSE	FALSE	FALSE	FALSE	FALSE	FALSE	FALSE	FALSE	FALSE	81	1	Autres diagnostics	2014-01-15	Traitement médico-chirurgical	FALSE	FALSE	TRUE	FALSE	FALSE	FALSE	TRUE	FALSE	TRUE	FALSE	FALSE	FALSE	FALSE	FALSE
HGR de Bumbu	Quartiers excentriques et d'extension	2015-02-06	Quartiers excentriques et d'extension	35		Patiente venue d'elle même			2014-01-20		34								FALSE	FALSE	FALSE	FALSE	FALSE	FALSE	FALSE	FALSE	FALSE	FALSE	FALSE	TRUE	82	1	Autres diagnostics	2014-01-20	Traitement médico-chirurgical	FALSE	FALSE	TRUE	FALSE	FALSE	FALSE	FALSE	FALSE	TRUE	TRUE	FALSE	FALSE	FALSE	FALSE
HGR de Bumbu	Quartiers excentriques et d'extension	2015-02-06	Quartiers excentriques et d'extension	20		Patiente référée	Quartiers des cités planifiées	2014-01-20	2014-01-20				1		0		0		FALSE	FALSE	FALSE	FALSE	FALSE	FALSE	FALSE	FALSE	FALSE	FALSE	FALSE	FALSE	83	1	Autres diagnostics	2014-01-29	Traitement médico-chirurgical	TRUE	FALSE	FALSE	FALSE	FALSE	FALSE	TRUE	FALSE	TRUE	FALSE	FALSE	FALSE	FALSE	FALSE
HGR de Bumbu	Quartiers excentriques et d'extension	2015-02-06	Quartiers excentriques et d'extension	32		Patiente venue d'elle même			2014-01-12	2014-01-12 05:30:00			2		1		0		FALSE	FALSE	FALSE	FALSE	FALSE	FALSE	FALSE	FALSE	FALSE	FALSE	FALSE	FALSE	84	1	Autres diagnostics	2014-01-12	Traitement médico-chirurgical	FALSE	FALSE	TRUE	FALSE	FALSE	FALSE	TRUE	FALSE	TRUE	FALSE	FALSE	FALSE	FALSE	FALSE
HGR de Bumbu	Quartiers excentriques et d'extension	2015-02-06	Quartiers excentriques et d'extension	22		Patiente venue d'elle même			2014-01-09				2		1		0		FALSE	FALSE	FALSE	FALSE	FALSE	FALSE	FALSE	FALSE	FALSE	FALSE	FALSE	FALSE	85	1	Autres diagnostics	2014-01-10	Traitement médico-chirurgical	FALSE	FALSE	TRUE	FALSE	FALSE	FALSE	TRUE	FALSE	TRUE	TRUE	FALSE	FALSE	FALSE	FALSE
HGR de Bumbu	Quartiers excentriques et d'extension	2015-02-06	Quartiers excentriques et d'extension	32		Patiente venue d'elle même			2014-01-11	2014-01-11 09:30:00	36.5	100	3	60	2	22	0	81	FALSE	FALSE	FALSE	FALSE	FALSE	FALSE	FALSE	FALSE	FALSE	FALSE	FALSE	FALSE	86	1	Autres diagnostics	2014-01-11	Traitement médico-chirurgical	FALSE	FALSE	TRUE	FALSE	FALSE	FALSE	TRUE	FALSE	TRUE	TRUE	FALSE	FALSE	FALSE	FALSE
HGR de Kinkolé	Quartiers semi-ruraux	2015-02-05	Quartiers semi-ruraux	30		DND			2014-05-05										FALSE	FALSE	FALSE	TRUE	FALSE	FALSE	FALSE	FALSE	FALSE	FALSE	FALSE	FALSE	87	1	Autres diagnostics	2014-05-01	Traitement médico-chirurgical	FALSE	FALSE	FALSE	FALSE	FALSE	FALSE	FALSE	FALSE	FALSE	FALSE	FALSE	FALSE	FALSE	FALSE
HGR de Kinkolé	Quartiers semi-ruraux	2015-02-05	Quartiers semi-ruraux	25					2014-06-01										TRUE	FALSE	FALSE	FALSE	FALSE	FALSE	FALSE	FALSE	FALSE	FALSE	FALSE	FALSE	88	1	Complication d'avortement provoqué	2014-06-01	Traitement médico-chirurgical	FALSE	FALSE	FALSE	FALSE	FALSE	FALSE	FALSE	FALSE	FALSE	FALSE	FALSE	FALSE	FALSE	FALSE
HGR de Kinkolé	Quartiers semi-ruraux	2015-02-05	Quartiers semi-ruraux	26		DND			2014-05-04										TRUE	FALSE	FALSE	FALSE	FALSE	FALSE	FALSE	FALSE	FALSE	FALSE	FALSE	FALSE	89	1	Complication d'avortement provoqué	2014-05-04	Traitement médico-chirurgical	FALSE	FALSE	FALSE	FALSE	FALSE	FALSE	FALSE	FALSE	FALSE	FALSE	FALSE	FALSE	FALSE	FALSE
HGR de Kinkolé	Quartiers semi-ruraux	2015-02-05	Quartiers semi-ruraux	32					2014-06-08										FALSE	FALSE	FALSE	FALSE	FALSE	FALSE	FALSE	FALSE	FALSE	FALSE	FALSE	FALSE	90	1	Autres diagnostics	2014-06-08	Traitement médico-chirurgical	FALSE	FALSE	FALSE	FALSE	FALSE	FALSE	FALSE	FALSE	FALSE	FALSE	FALSE	FALSE	TRUE	FALSE
HGR de Kinkolé	Quartiers semi-ruraux	2015-02-05	Quartiers semi-ruraux	19					2014-06-20										TRUE	FALSE	FALSE	FALSE	FALSE	FALSE	FALSE	FALSE	FALSE	FALSE	FALSE	FALSE	91	1	Complication d'avortement provoqué	2014-06-20	Traitement médico-chirurgical	FALSE	FALSE	FALSE	FALSE	FALSE	FALSE	FALSE	FALSE	FALSE	FALSE	FALSE	FALSE	FALSE	FALSE
HGR de Kinkolé	Quartiers semi-ruraux	2015-02-05	Quartiers semi-ruraux	30					2014-07-19										TRUE	FALSE	FALSE	FALSE	FALSE	FALSE	FALSE	FALSE	FALSE	FALSE	FALSE	FALSE	92	1	Complication d'avortement provoqué	2014-07-19	Traitement médico-chirurgical	FALSE	TRUE	FALSE	FALSE	FALSE	FALSE	FALSE	FALSE	FALSE	FALSE	FALSE	FALSE	FALSE	FALSE
HGR de Kinkolé	Quartiers semi-ruraux	2015-02-05	Quartiers semi-ruraux	28					2014-07-21										FALSE	TRUE	FALSE	FALSE	FALSE	FALSE	FALSE	FALSE	FALSE	FALSE	FALSE	FALSE	93	1	Avortement spontané	2014-07-21	Traitement médico-chirurgical	FALSE	FALSE	FALSE	FALSE	FALSE	FALSE	FALSE	FALSE	FALSE	FALSE	FALSE	FALSE	FALSE	FALSE
HGR de Kinkolé	Quartiers semi-ruraux	2015-02-05	Quartiers semi-ruraux	18					2014-07-21										FALSE	TRUE	FALSE	FALSE	FALSE	FALSE	FALSE	FALSE	FALSE	FALSE	FALSE	FALSE	94	1	Avortement spontané	2014-07-21	Traitement médico-chirurgical	FALSE	FALSE	FALSE	FALSE	FALSE	FALSE	FALSE	FALSE	FALSE	FALSE	FALSE	FALSE	FALSE	FALSE
HGR de Kinkolé	Quartiers semi-ruraux	2015-02-05	Quartiers des cités planifiées	27					2014-08-04										FALSE	TRUE	FALSE	FALSE	FALSE	FALSE	FALSE	FALSE	FALSE	FALSE	FALSE	FALSE	95	1	Avortement spontané	2014-08-04	Traitement médico-chirurgical	FALSE	FALSE	FALSE	FALSE	FALSE	FALSE	FALSE	FALSE	FALSE	FALSE	FALSE	FALSE	FALSE	FALSE
HGR de Kinkolé	Quartiers semi-ruraux	2015-02-05	Quartiers semi-ruraux	17					2014-12-01										FALSE	TRUE	FALSE	FALSE	FALSE	FALSE	FALSE	FALSE	FALSE	FALSE	FALSE	FALSE	96	1	Avortement spontané	2014-12-01	Traitement médical	FALSE	FALSE	TRUE	FALSE	FALSE	FALSE	TRUE	FALSE	TRUE	TRUE	FALSE	FALSE	FALSE	FALSE
HGR de Kinkolé	Quartiers semi-ruraux	2015-02-05							2014-12-31										FALSE	FALSE	FALSE	FALSE	FALSE	FALSE	FALSE	FALSE	FALSE	FALSE	FALSE	FALSE	97	1	Autres diagnostics	2014-12-31	Traitement médical	TRUE	TRUE	FALSE	FALSE	FALSE	FALSE	FALSE	FALSE	FALSE	FALSE	TRUE	FALSE	FALSE	FALSE
HGR de Kinkolé	Quartiers semi-ruraux	2015-02-05	Quartiers semi-ruraux	42					2014-12-20										FALSE	FALSE	FALSE	FALSE	TRUE	FALSE	FALSE	FALSE	FALSE	FALSE	FALSE	FALSE	98	1	Autres diagnostics	2014-12-20	Traitement médico-chirurgical	TRUE	FALSE	FALSE	FALSE	FALSE	FALSE	FALSE	TRUE	FALSE	FALSE	FALSE	FALSE	FALSE	FALSE
HGR de Kinkolé	Quartiers semi-ruraux	2015-02-05	Quartiers semi-ruraux	15					2014-12-28										FALSE	FALSE	FALSE	FALSE	TRUE	FALSE	FALSE	FALSE	FALSE	FALSE	FALSE	FALSE	99	1	Autres diagnostics	2014-12-28	Traitement médical	FALSE	FALSE	FALSE	FALSE	FALSE	FALSE	FALSE	TRUE	FALSE	FALSE	FALSE	FALSE	FALSE	FALSE
HGR de Kinkolé	Quartiers semi-ruraux	2015-02-05	Quartiers excentriques et d'extension	20					2014-12-30										TRUE	FALSE	FALSE	FALSE	FALSE	FALSE	FALSE	FALSE	FALSE	FALSE	FALSE	FALSE	100	1	Complication d'avortement provoqué	2014-12-30	Traitement médico-chirurgical	FALSE	FALSE	FALSE	FALSE	FALSE	FALSE	TRUE	FALSE	FALSE	TRUE	FALSE	FALSE	FALSE	FALSE
HGR de Kinkolé	Quartiers semi-ruraux	2015-02-05	Quartiers semi-ruraux	23					2014-12-26										FALSE	FALSE	FALSE	FALSE	TRUE	TRUE	FALSE	FALSE	FALSE	FALSE	FALSE	FALSE	101	1	Autres diagnostics	2014-12-26	Traitement médical	FALSE	FALSE	FALSE	FALSE	FALSE	FALSE	FALSE	TRUE	FALSE	TRUE	FALSE	FALSE	FALSE	FALSE
HGR de Kinkolé	Quartiers semi-ruraux	2015-02-05	Quartiers semi-ruraux	18					2014-12-26										FALSE	FALSE	FALSE	FALSE	FALSE	FALSE	FALSE	FALSE	FALSE	FALSE	FALSE	FALSE	102	1	Autres diagnostics		Traitement médico-chirurgical	FALSE	FALSE	FALSE	FALSE	FALSE	FALSE	FALSE	FALSE	FALSE	FALSE	FALSE	FALSE	TRUE	FALSE
HGR de Kinkolé	Quartiers semi-ruraux	2015-02-05	Quartiers semi-ruraux	27					2014-12-26										TRUE	FALSE	FALSE	FALSE	FALSE	FALSE	FALSE	FALSE	FALSE	FALSE	FALSE	FALSE	103	1	Complication d'avortement provoqué	2014-12-26	Traitement médico-chirurgical	FALSE	FALSE	FALSE	FALSE	FALSE	FALSE	FALSE	FALSE	FALSE	FALSE	FALSE	FALSE	FALSE	FALSE
HGR de Kinkolé	Quartiers semi-ruraux	2015-02-05	Quartiers semi-ruraux	27					2014-12-25										TRUE	FALSE	FALSE	FALSE	FALSE	FALSE	FALSE	FALSE	FALSE	FALSE	FALSE	FALSE	104	1	Complication d'avortement provoqué	2014-12-25	Traitement médico-chirurgical	TRUE	TRUE	FALSE	FALSE	FALSE	FALSE	FALSE	FALSE	FALSE	TRUE	FALSE	TRUE	FALSE	FALSE
HGR de Kinkolé	Quartiers semi-ruraux	2015-02-05	Quartiers excentriques et d'extension						2014-12-24										FALSE	TRUE	FALSE	FALSE	FALSE	FALSE	FALSE	FALSE	FALSE	FALSE	FALSE	FALSE	105	1	Avortement spontané	2014-12-24	Traitement médico-chirurgical	FALSE	FALSE	FALSE	FALSE	FALSE	FALSE	FALSE	FALSE	FALSE	FALSE	FALSE	FALSE	FALSE	FALSE
HGR de Kinkolé	Quartiers semi-ruraux	2015-02-05	Quartiers semi-ruraux	29					2014-12-07										FALSE	FALSE	FALSE	FALSE	FALSE	FALSE	FALSE	FALSE	FALSE	FALSE	FALSE	FALSE	106	1	Autres diagnostics	2014-12-07	Traitement médico-chirurgical	FALSE	FALSE	FALSE	FALSE	FALSE	FALSE	FALSE	FALSE	FALSE	FALSE	FALSE	FALSE	FALSE	FALSE
HGR de Kinkolé	Quartiers semi-ruraux	2015-02-05	Quartiers semi-ruraux	19					2014-12-03										FALSE	FALSE	FALSE	FALSE	FALSE	FALSE	FALSE	FALSE	FALSE	FALSE	FALSE	FALSE	107	1	Autres diagnostics	2014-12-03	Traitement médico-chirurgical	FALSE	FALSE	FALSE	FALSE	FALSE	FALSE	FALSE	FALSE	FALSE	FALSE	FALSE	FALSE	FALSE	FALSE
HGR de Kinkolé	Quartiers semi-ruraux	2015-02-05	Quartiers semi-ruraux	18					2014-12-21										TRUE	FALSE	FALSE	FALSE	FALSE	FALSE	FALSE	FALSE	FALSE	FALSE	FALSE	FALSE	108	1	Complication d'avortement provoqué	2014-12-21	Traitement médico-chirurgical	TRUE	FALSE	FALSE	FALSE	FALSE	FALSE	FALSE	FALSE	FALSE	FALSE	FALSE	FALSE	FALSE	FALSE
HGR de Kinkolé	Quartiers semi-ruraux	2015-02-05	Quartiers semi-ruraux						2014-12-16										FALSE	TRUE	FALSE	FALSE	FALSE	FALSE	FALSE	FALSE	FALSE	FALSE	FALSE	FALSE	109	1	Avortement spontané	2014-12-16	Traitement médico-chirurgical	FALSE	FALSE	FALSE	FALSE	FALSE	FALSE	FALSE	FALSE	FALSE	FALSE	FALSE	FALSE	FALSE	FALSE
HGR de Kinkolé	Quartiers semi-ruraux	2015-02-05	Quartiers semi-ruraux	20					2014-12-17										FALSE	TRUE	FALSE	FALSE	FALSE	FALSE	FALSE	FALSE	FALSE	FALSE	FALSE	FALSE	110	1	Avortement spontané	2014-12-17	Traitement médico-chirurgical	FALSE	FALSE	FALSE	FALSE	FALSE	FALSE	FALSE	FALSE	FALSE	FALSE	FALSE	FALSE	FALSE	FALSE
HGR de Kinkolé	Quartiers semi-ruraux	2015-02-05	Quartiers semi-ruraux	31		Patiente venue d'elle même			2014-12-18										FALSE	FALSE	FALSE	FALSE	FALSE	FALSE	FALSE	FALSE	FALSE	FALSE	FALSE	FALSE	111	1	Autres diagnostics	2014-12-18		FALSE	FALSE	FALSE	FALSE	FALSE	FALSE	FALSE	FALSE	FALSE	FALSE	FALSE	FALSE	FALSE	FALSE
HGR de Kinkolé	Quartiers semi-ruraux	2015-02-05	Quartiers semi-ruraux	17					2014-12-15										FALSE	TRUE	FALSE	FALSE	FALSE	FALSE	FALSE	FALSE	FALSE	FALSE	FALSE	FALSE	112	1	Avortement spontané	2014-12-15	Traitement médico-chirurgical	FALSE	FALSE	FALSE	FALSE	FALSE	FALSE	FALSE	FALSE	FALSE	FALSE	FALSE	FALSE	FALSE	FALSE
HGR de Kinkolé	Quartiers semi-ruraux	2015-02-05	Quartiers semi-ruraux	30					2014-12-15										FALSE	TRUE	FALSE	FALSE	FALSE	FALSE	FALSE	FALSE	FALSE	FALSE	FALSE	FALSE	113	1	Avortement spontané	2014-12-15	Traitement médico-chirurgical	FALSE	FALSE	FALSE	FALSE	FALSE	FALSE	FALSE	FALSE	FALSE	FALSE	FALSE	FALSE	FALSE	FALSE
HGR de Kinkolé	Quartiers semi-ruraux	2015-02-05	Quartiers semi-ruraux	30					2014-12-14										FALSE	TRUE	FALSE	FALSE	FALSE	FALSE	FALSE	FALSE	FALSE	FALSE	FALSE	FALSE	114	1	Avortement spontané	2014-12-14	Traitement médico-chirurgical	FALSE	FALSE	FALSE	FALSE	FALSE	FALSE	FALSE	FALSE	FALSE	FALSE	FALSE	FALSE	FALSE	FALSE
HGR de Kinkolé	Quartiers semi-ruraux	2015-02-05	Quartiers semi-ruraux	41					2014-12-12										FALSE	FALSE	FALSE	FALSE	TRUE	TRUE	FALSE	FALSE	FALSE	FALSE	FALSE	FALSE	115	1	Autres diagnostics	2014-12-12	Traitement médical	TRUE	FALSE	FALSE	FALSE	FALSE	FALSE	FALSE	TRUE	FALSE	TRUE	FALSE	FALSE	FALSE	FALSE
HGR de Kinkolé	Quartiers semi-ruraux	2015-02-05	Quartiers semi-ruraux						2014-12-11										TRUE	FALSE	FALSE	FALSE	FALSE	FALSE	FALSE	FALSE	FALSE	FALSE	FALSE	FALSE	116	1	Complication d'avortement provoqué	2014-12-11	Traitement médical	FALSE	FALSE	FALSE	FALSE	TRUE	FALSE	FALSE	FALSE	FALSE	TRUE	FALSE	FALSE	FALSE	FALSE
HGR de Kinkolé	Quartiers semi-ruraux	2015-02-05	Quartiers semi-ruraux	44					2014-12-05										FALSE	TRUE	FALSE	FALSE	FALSE	FALSE	FALSE	FALSE	FALSE	FALSE	FALSE	FALSE	117	1	Avortement spontané	2014-12-05	Traitement médico-chirurgical	FALSE	FALSE	FALSE	FALSE	FALSE	FALSE	FALSE	FALSE	FALSE	FALSE	FALSE	FALSE	FALSE	FALSE
HGR de Kinkolé	Quartiers semi-ruraux	2015-02-05	Quartiers semi-ruraux	18					2014-12-06										FALSE	TRUE	FALSE	FALSE	FALSE	FALSE	FALSE	FALSE	FALSE	FALSE	FALSE	FALSE	118	1	Avortement spontané	2014-12-06	Traitement médico-chirurgical	FALSE	FALSE	FALSE	FALSE	FALSE	FALSE	FALSE	FALSE	FALSE	FALSE	FALSE	FALSE	FALSE	FALSE
HGR de Kinkolé	Quartiers semi-ruraux	2015-02-05	Quartiers semi-ruraux	17					2014-12-03										FALSE	FALSE	FALSE	FALSE	FALSE	FALSE	FALSE	FALSE	TRUE	FALSE	FALSE	FALSE	119	1	Autres diagnostics	2014-12-03	Traitement médico-chirurgical	FALSE	FALSE	FALSE	FALSE	FALSE	FALSE	FALSE	FALSE	FALSE	FALSE	FALSE	FALSE	FALSE	FALSE
HGR de Kinkolé	Quartiers semi-ruraux	2015-02-05	Quartiers semi-ruraux	34					2014-12-02										FALSE	FALSE	FALSE	FALSE	FALSE	TRUE	FALSE	FALSE	FALSE	FALSE	FALSE	FALSE	120	1	Autres diagnostics	2014-12-02	Traitement médical	FALSE	FALSE	FALSE	FALSE	FALSE	TRUE	FALSE	FALSE	FALSE	FALSE	FALSE	FALSE	FALSE	FALSE
HGR de Kinkolé	Quartiers semi-ruraux	2015-02-05	Quartiers semi-ruraux	41					2014-11-28										FALSE	FALSE	FALSE	FALSE	TRUE	FALSE	FALSE	FALSE	FALSE	FALSE	FALSE	FALSE	121	1	Autres diagnostics	2014-11-28	Traitement médical	FALSE	FALSE	FALSE	FALSE	FALSE	FALSE	FALSE	TRUE	FALSE	FALSE	FALSE	FALSE	FALSE	FALSE
HGR de Kinkolé	Quartiers semi-ruraux	2015-02-05	Quartiers semi-ruraux	25					2014-12-02										FALSE	FALSE	FALSE	FALSE	FALSE	TRUE	FALSE	FALSE	FALSE	FALSE	FALSE	FALSE	122	1	Autres diagnostics	2014-12-02	Traitement médical	TRUE	FALSE	FALSE	FALSE	FALSE	TRUE	FALSE	FALSE	FALSE	FALSE	FALSE	FALSE	FALSE	FALSE
HGR de Kinkolé	Quartiers semi-ruraux	2015-02-05	Quartiers semi-ruraux	42					2014-05-01										FALSE	TRUE	FALSE	FALSE	FALSE	FALSE	FALSE	FALSE	FALSE	FALSE	FALSE	FALSE	123	1	Avortement spontané	2014-05-01	Traitement médico-chirurgical	FALSE	FALSE	FALSE	FALSE	FALSE	FALSE	FALSE	FALSE	FALSE	FALSE	FALSE	FALSE	FALSE	FALSE
HGR de Kinkolé	Quartiers semi-ruraux	2015-02-05	Quartiers semi-ruraux	23					2014-05-05										FALSE	TRUE	FALSE	FALSE	FALSE	FALSE	FALSE	FALSE	FALSE	FALSE	FALSE	FALSE	124	1	Avortement spontané	2014-05-05	Traitement médico-chirurgical	FALSE	FALSE	FALSE	FALSE	FALSE	FALSE	FALSE	FALSE	FALSE	FALSE	FALSE	FALSE	FALSE	FALSE
HGR de Kinkolé	Quartiers semi-ruraux	2015-02-05	Quartiers excentriques et d'extension	40					2014-05-03										FALSE	FALSE	FALSE	FALSE	TRUE	FALSE	FALSE	FALSE	FALSE	FALSE	FALSE	FALSE	125	1	Autres diagnostics	2014-05-03	Traitement médical	FALSE	FALSE	FALSE	FALSE	FALSE	FALSE	FALSE	FALSE	FALSE	FALSE	FALSE	FALSE	FALSE	FALSE
HGR de Kinkolé	Quartiers semi-ruraux	2015-02-05	Quartiers semi-ruraux	26	Mariée	Patiente venue d'elle même			2014-12-10	2014-12-10 01:30:00		140	3	90	0		2		FALSE	FALSE	FALSE	FALSE	TRUE	FALSE	FALSE	FALSE	FALSE	FALSE	FALSE	FALSE	126	1	Autres diagnostics	2014-12-10	Traitement médical	FALSE	FALSE	FALSE	FALSE	FALSE	FALSE	FALSE	TRUE	FALSE	FALSE	FALSE	FALSE	FALSE	FALSE
HGR de Kinkolé	Quartiers semi-ruraux	2015-02-05	Quartiers semi-ruraux	15	Celibataire	Patiente référée	Quartiers semi-ruraux	2014-12-28	2014-12-28		36	130	1	80	0		0		FALSE	FALSE	FALSE	FALSE	TRUE	FALSE	FALSE	FALSE	FALSE	FALSE	FALSE	FALSE	127	1	Autres diagnostics	2014-12-28	Traitement médical	FALSE	FALSE	FALSE	FALSE	FALSE	FALSE	FALSE	TRUE	FALSE	FALSE	FALSE	FALSE	FALSE	FALSE
HGR de Kinkolé	Quartiers semi-ruraux	2015-02-05	Quartiers semi-ruraux	40		Patiente venue d'elle même			2014-12-28		36	120	7	70	5		1		FALSE	TRUE	FALSE	FALSE	FALSE	FALSE	FALSE	FALSE	FALSE	FALSE	FALSE	FALSE	128	1	Avortement spontané	2015-01-02	Traitement médico-chirurgical	TRUE	FALSE	FALSE	FALSE	FALSE	FALSE	TRUE	FALSE	FALSE	FALSE	FALSE	FALSE	FALSE	FALSE
HGR de Kinkolé	Quartiers semi-ruraux	2015-02-05	Quartiers résidentiels	17		Patiente référée	Quartiers semi-ruraux	2014-12-28	2014-12-28										FALSE	FALSE	FALSE	FALSE	FALSE	FALSE	FALSE	FALSE	TRUE	FALSE	FALSE	FALSE	129	1	Autres diagnostics	2014-12-28	Traitement médico-chirurgical	FALSE	FALSE	TRUE	FALSE	FALSE	FALSE	TRUE	FALSE	TRUE	FALSE	FALSE	FALSE	FALSE	FALSE
HGR de Kinkolé	Quartiers semi-ruraux	2015-02-05	Quartiers semi-ruraux	30	Mariée	Patiente venue d'elle même			2014-09-12	2014-09-12 21:50:00			6		3		0		TRUE	FALSE	FALSE	FALSE	FALSE	FALSE	FALSE	FALSE	FALSE	FALSE	FALSE	FALSE	130	1	Complication d'avortement provoqué	2014-09-12	Traitement médical	FALSE	FALSE	FALSE	FALSE	FALSE	FALSE	FALSE	FALSE	FALSE	TRUE	FALSE	FALSE	FALSE	FALSE
HGR de Kinkolé	Quartiers semi-ruraux	2015-02-05	Quartiers semi-ruraux	41	Mariée	Patiente venue d'elle même			2014-10-29			190	5	120	5		0		FALSE	FALSE	FALSE	FALSE	TRUE	FALSE	FALSE	FALSE	FALSE	FALSE	FALSE	FALSE	131	1	Autres diagnostics	2014-11-29	Traitement médical	FALSE	FALSE	FALSE	FALSE	FALSE	FALSE	FALSE	TRUE	FALSE	FALSE	FALSE	FALSE	FALSE	FALSE
HGR de Kinkolé	Quartiers semi-ruraux	2015-02-05	Quartiers semi-ruraux	42	Mariée	Patiente référée	Quartiers semi-ruraux	2014-10-26	2014-10-26			110	5	70	5		0	120	FALSE	FALSE	FALSE	FALSE	FALSE	FALSE	FALSE	FALSE	TRUE	FALSE	FALSE	FALSE	132	1	Autres diagnostics	2014-10-26	Traitement médico-chirurgical	FALSE	FALSE	FALSE	FALSE	FALSE	FALSE	FALSE	FALSE	FALSE	FALSE	FALSE	FALSE	FALSE	FALSE
HGR de Kinkolé	Quartiers semi-ruraux	2015-02-05	Quartiers semi-ruraux	18		Patiente venue d'elle même			2014-12-26				1		0		0		FALSE	FALSE	FALSE	FALSE	FALSE	FALSE	FALSE	FALSE	FALSE	FALSE	FALSE	FALSE	133	1	Autres diagnostics	2014-12-26	Traitement médico-chirurgical	FALSE	FALSE	FALSE	FALSE	FALSE	FALSE	FALSE	FALSE	FALSE	FALSE	FALSE	FALSE	TRUE	FALSE
HGR de Kinkolé	Quartiers semi-ruraux	2015-02-05	Quartiers semi-ruraux	27	Mariée	Patiente venue d'elle même			2014-10-09		36	120	2	78	1		1		FALSE	TRUE	FALSE	FALSE	FALSE	FALSE	FALSE	FALSE	FALSE	FALSE	FALSE	FALSE	134	1	Avortement spontané	2014-10-09	Traitement médical	FALSE	FALSE	TRUE	FALSE	FALSE	FALSE	FALSE	FALSE	FALSE	TRUE	FALSE	FALSE	FALSE	FALSE
HGR de Kinkolé	Quartiers semi-ruraux	2015-02-05	Quartiers excentriques et d'extension	20	Celibataire	Patiente venue d'elle même			2014-12-30		36	120	1	80	0		1		TRUE	FALSE	FALSE	FALSE	FALSE	FALSE	FALSE	FALSE	FALSE	FALSE	FALSE	FALSE	135	1	Complication d'avortement provoqué		Traitement médical	TRUE	FALSE	FALSE	FALSE	FALSE	FALSE	FALSE	FALSE	FALSE	TRUE	FALSE	TRUE	FALSE	FALSE
HGR de Kinkolé	Quartiers semi-ruraux	2015-02-05	Quartiers semi-ruraux	42		Patiente référée		2014-10-26	2014-10-26										FALSE	FALSE	FALSE	FALSE	FALSE	FALSE	FALSE	FALSE	FALSE	FALSE	FALSE	FALSE	136	1	Autres diagnostics	2014-10-26	Traitement médico-chirurgical	FALSE	FALSE	FALSE	FALSE	FALSE	FALSE	FALSE	FALSE	FALSE	FALSE	FALSE	FALSE	FALSE	FALSE
HGR de Kinkolé	Quartiers semi-ruraux	2015-02-05	Quartiers semi-ruraux	27					2014-10-26										FALSE	FALSE	FALSE	FALSE	FALSE	FALSE	FALSE	FALSE	FALSE	TRUE	FALSE	FALSE	137	1	Autres diagnostics	2014-10-26	Traitement médico-chirurgical	FALSE	FALSE	FALSE	FALSE	FALSE	FALSE	FALSE	FALSE	FALSE	FALSE	FALSE	FALSE	FALSE	FALSE
HGR de Kinkolé	Quartiers semi-ruraux	2015-02-05	Quartiers semi-ruraux	39					2014-10-13										TRUE	FALSE	FALSE	FALSE	FALSE	FALSE	FALSE	FALSE	FALSE	FALSE	FALSE	FALSE	138	1	Complication d'avortement provoqué	2014-10-13	Traitement médical	FALSE	FALSE	FALSE	FALSE	FALSE	FALSE	FALSE	FALSE	FALSE	FALSE	FALSE	FALSE	FALSE	FALSE
HGR de Kinkolé	Quartiers semi-ruraux	2015-02-05	Quartiers semi-ruraux	28					2014-10-21										FALSE	TRUE	FALSE	FALSE	FALSE	FALSE	FALSE	FALSE	FALSE	FALSE	FALSE	FALSE	139	1	Avortement spontané	2014-10-21	Traitement médico-chirurgical	FALSE	FALSE	FALSE	FALSE	FALSE	FALSE	FALSE	FALSE	FALSE	FALSE	FALSE	FALSE	FALSE	FALSE
HGR de Kinkolé	Quartiers semi-ruraux	2015-02-05	Quartiers des cités planifiées	35					2014-10-20										TRUE	FALSE	FALSE	FALSE	FALSE	FALSE	FALSE	FALSE	FALSE	FALSE	FALSE	FALSE	140	1	Complication d'avortement provoqué	2014-10-20	Traitement médico-chirurgical	FALSE	FALSE	FALSE	FALSE	FALSE	FALSE	FALSE	FALSE	FALSE	FALSE	FALSE	FALSE	FALSE	FALSE
HGR de Kinkolé	Quartiers semi-ruraux	2015-02-05	Quartiers semi-ruraux	37					2014-10-20										FALSE	TRUE	FALSE	FALSE	FALSE	FALSE	FALSE	FALSE	FALSE	FALSE	FALSE	FALSE	141	1	Avortement spontané	2014-10-20	Traitement médico-chirurgical	FALSE	FALSE	FALSE	FALSE	FALSE	FALSE	FALSE	FALSE	FALSE	FALSE	FALSE	FALSE	FALSE	FALSE
HGR de Kinkolé	Quartiers semi-ruraux	2015-02-02	Quartiers semi-ruraux	21	Mariée	Patiente référée	Quartiers semi-ruraux	2014-01-05	2014-01-05			150	6	100	5		0	82	FALSE	FALSE	FALSE	FALSE	FALSE	FALSE	FALSE	FALSE	FALSE	FALSE	FALSE	FALSE	142	1	Autres diagnostics	2014-01-05	Traitement médico-chirurgical	TRUE	FALSE	FALSE	FALSE	FALSE	FALSE	FALSE	FALSE	TRUE	FALSE	FALSE	FALSE	FALSE	FALSE
Maternité de Kintambo	Quartiers des anciennes cités	2015-02-02	Quartiers résidentiels	30		Patiente venue d'elle même			2014-11-08	2014-11-08 00:35:00			4		2		2		FALSE	FALSE	FALSE	TRUE	FALSE	FALSE	TRUE	FALSE	FALSE	FALSE	FALSE	FALSE	143	1	Autres diagnostics	2014-11-08	Traitement médico-chirurgical	TRUE	FALSE	FALSE	FALSE	FALSE	FALSE	FALSE	FALSE	FALSE	FALSE	FALSE	FALSE	FALSE	FALSE
Maternité de Kintambo	Quartiers des anciennes cités	2015-02-02	Quartiers semi-ruraux	25	DND	Patiente référée		2014-11-06	2014-11-06		39	110	6	50	5	60	1	156	TRUE	FALSE	FALSE	FALSE	FALSE	FALSE	FALSE	FALSE	FALSE	FALSE	FALSE	FALSE	144	1	Complication d'avortement provoqué	2014-11-06	Traitement médico-chirurgical	FALSE	FALSE	FALSE	FALSE	FALSE	FALSE	FALSE	FALSE	FALSE	TRUE	FALSE	FALSE	FALSE	FALSE
Maternité de Kintambo	Quartiers des anciennes cités	2015-02-04	Quartiers résidentiels	26	Mariée	Patiente venue d'elle même			2014-11-21	2014-11-21 22:25:00		120	1	70	0		0		FALSE	FALSE	FALSE	FALSE	FALSE	FALSE	FALSE	FALSE	TRUE	FALSE	FALSE	FALSE	145	1	Autres diagnostics	2014-11-22	Traitement médico-chirurgical	FALSE	FALSE	TRUE	FALSE	FALSE	FALSE	TRUE	FALSE	TRUE	FALSE	FALSE	FALSE	FALSE	FALSE
Maternité de Kintambo	Quartiers des anciennes cités	2015-02-04	Quartiers résidentiels	37	DND	Patiente venue d'elle même			2014-11-06			60	10	40	9		1		FALSE	FALSE	FALSE	FALSE	FALSE	FALSE	FALSE	FALSE	FALSE	FALSE	FALSE	TRUE	146	1	Autres diagnostics	2014-11-06	Traitement médico-chirurgical	FALSE	FALSE	FALSE	FALSE	FALSE	FALSE	TRUE	FALSE	FALSE	FALSE	FALSE	TRUE	FALSE	FALSE
Maternité de Kintambo	Quartiers des anciennes cités	2015-02-04	Quartiers des cités planifiées	35		Patiente venue d'elle même			2014-12-16	2014-12-16 14:55:00		100	6	60	1		5		FALSE	FALSE	FALSE	FALSE	FALSE	FALSE	FALSE	FALSE	FALSE	FALSE	TRUE	FALSE	147	1	Autres diagnostics	2014-12-16	Traitement médico-chirurgical	FALSE	FALSE	TRUE	FALSE	FALSE	FALSE	FALSE	FALSE	TRUE	FALSE	FALSE	FALSE	FALSE	FALSE
Maternité de Kintambo	Quartiers des anciennes cités	2015-02-04	Quartiers des cités planifiées	20	Mariée	Patiente venue d'elle même			2014-12-07	2014-12-07 17:05:00		110	2	60	1		0		FALSE	FALSE	FALSE	FALSE	FALSE	FALSE	FALSE	FALSE	FALSE	FALSE	FALSE	FALSE	148	1	Autres diagnostics	2014-12-07		FALSE	FALSE	TRUE	FALSE	FALSE	FALSE	TRUE	FALSE	TRUE	FALSE	FALSE	FALSE	TRUE	FALSE
Maternité de Kintambo	Quartiers des anciennes cités	2014-02-04	Quartiers résidentiels	32		Patiente référée	Quartiers résidentiels	2014-11-28	2014-11-28	2014-11-28 11:09:00			4		2		1		FALSE	FALSE	FALSE	FALSE	FALSE	FALSE	FALSE	FALSE	TRUE	FALSE	FALSE	FALSE	149	1	Autres diagnostics	2014-11-28	Traitement médico-chirurgical	FALSE	FALSE	TRUE	FALSE	FALSE	FALSE	TRUE	FALSE	FALSE	FALSE	FALSE	TRUE	FALSE	FALSE
Maternité de Kintambo	Quartiers des anciennes cités	2014-02-04	Quartiers résidentiels	32	Mariée	Patiente venue d'elle même			2014-11-20	2014-11-20 22:30:00		150	6	100	0		5		FALSE	FALSE	FALSE	FALSE	TRUE	FALSE	FALSE	FALSE	FALSE	FALSE	FALSE	FALSE	150	1	Autres diagnostics	2014-11-20	Traitement médico-chirurgical	TRUE	FALSE	FALSE	FALSE	FALSE	FALSE	TRUE	FALSE	FALSE	FALSE	FALSE	TRUE	FALSE	FALSE
Maternité de Kintambo	Quartiers des anciennes cités	2014-02-04	Quartiers des cités planifiées	36	DND	Patiente venue d'elle même			2014-12-19			140	3	100	1		1		FALSE	FALSE	FALSE	FALSE	TRUE	FALSE	FALSE	FALSE	FALSE	FALSE	FALSE	FALSE	151	1	Autres diagnostics	2014-12-20	Traitement médico-chirurgical	TRUE	FALSE	FALSE	FALSE	FALSE	FALSE	FALSE	TRUE	FALSE	TRUE	FALSE	FALSE	FALSE	FALSE
Maternité de Kintambo	Quartiers des anciennes cités	2014-02-04	Quartiers résidentiels	37	Mariée	Patiente venue d'elle même			2014-12-08	2014-12-08 08:30:00			3		0		2		FALSE	FALSE	FALSE	FALSE	FALSE	FALSE	FALSE	FALSE	FALSE	TRUE	FALSE	FALSE	152	1	Autres diagnostics	2014-12-08	Traitement médico-chirurgical	FALSE	FALSE	FALSE	FALSE	FALSE	FALSE	FALSE	FALSE	FALSE	TRUE	FALSE	FALSE	FALSE	FALSE
Maternité de Kintambo	Quartiers des anciennes cités	2014-02-04	Quartiers des anciennes cités	27		Patiente venue d'elle même			2014-10-04	2014-10-04 11:10:00	37.7		3		2		0	124	TRUE	FALSE	FALSE	FALSE	FALSE	FALSE	FALSE	FALSE	FALSE	FALSE	FALSE	FALSE	153	1	Complication d'avortement provoqué	2014-10-04	Traitement médico-chirurgical	FALSE	FALSE	TRUE	FALSE	FALSE	FALSE	TRUE	FALSE	TRUE	TRUE	FALSE	TRUE	FALSE	FALSE
Maternité de Kintambo	Quartiers des anciennes cités	2014-02-04	Quartiers des cités planifiées	30		Patiente référée	Quartiers des anciennes cités	2014-10-20	2014-10-26	2014-10-26 14:45:00		100	2	70	1		0		FALSE	FALSE	FALSE	TRUE	FALSE	FALSE	FALSE	FALSE	FALSE	FALSE	FALSE	FALSE	154	1	Autres diagnostics	2014-10-26	Traitement médico-chirurgical	FALSE	FALSE	FALSE	FALSE	TRUE	FALSE	TRUE	FALSE	TRUE	FALSE	FALSE	FALSE	FALSE	FALSE
Maternité de Kintambo	Quartiers des anciennes cités	2014-02-04	Quartiers résidentiels	22	Mariée	Patiente référée	Quartiers résidentiels	2014-12-04	2014-12-04	2014-12-04 13:00:00		110	1	60	0		0		FALSE	FALSE	FALSE	FALSE	FALSE	FALSE	FALSE	FALSE	FALSE	FALSE	FALSE	FALSE	155	1	Autres diagnostics	2014-12-04	Traitement médico-chirurgical	FALSE	FALSE	TRUE	FALSE	FALSE	FALSE	TRUE	FALSE	TRUE	FALSE	FALSE	FALSE	FALSE	FALSE
Maternité de Kintambo	Quartiers des anciennes cités	2014-02-04	Quartiers excentriques et d'extension	38	Mariée	Patiente venue d'elle même			2014-12-12	2014-12-12 10:25:00		140	8	90	6		1		FALSE	FALSE	FALSE	FALSE	TRUE	FALSE	FALSE	FALSE	FALSE	FALSE	FALSE	FALSE	156	1	Autres diagnostics	2014-12-12	Traitement médico-chirurgical	FALSE	FALSE	TRUE	FALSE	FALSE	FALSE	TRUE	FALSE	TRUE	FALSE	FALSE	FALSE	FALSE	FALSE
Maternité de Kintambo	Quartiers des anciennes cités	2014-02-05	Quartiers des cités planifiées	29	DND	Patiente venue d'elle même			2014-12-03	2014-12-03 18:25:00		140	1	90	0		0	80	FALSE	FALSE	FALSE	FALSE	TRUE	FALSE	TRUE	FALSE	FALSE	FALSE	FALSE	FALSE	157	1	Autres diagnostics	2014-12-03	Traitement médical	TRUE	FALSE	FALSE	FALSE	FALSE	FALSE	FALSE	TRUE	FALSE	FALSE	FALSE	FALSE	FALSE	FALSE
Maternité de Kintambo	Quartiers des anciennes cités	2014-02-05	Quartiers résidentiels	39		Patiente venue d'elle même			2014-11-29	2014-11-29 16:35:00		140	8	100	7		0		FALSE	FALSE	FALSE	FALSE	FALSE	FALSE	FALSE	FALSE	FALSE	TRUE	FALSE	FALSE	158	1	Autres diagnostics	2014-11-29	Traitement médico-chirurgical	FALSE	FALSE	TRUE	FALSE	FALSE	FALSE	TRUE	FALSE	FALSE	FALSE	FALSE	TRUE	FALSE	FALSE
Maternité de Kintambo	Quartiers des anciennes cités	2014-02-05	Quartiers semi-ruraux	30		Patiente venue d'elle même			2014-10-29			100	3	60	2		0		FALSE	FALSE	FALSE	TRUE	FALSE	FALSE	FALSE	FALSE	FALSE	FALSE	FALSE	FALSE	159	1	Autres diagnostics	2014-10-29	Traitement médico-chirurgical	FALSE	FALSE	TRUE	FALSE	FALSE	FALSE	TRUE	FALSE	TRUE	FALSE	FALSE	TRUE	FALSE	FALSE
Maternité de Kintambo	Quartiers des anciennes cités	2014-02-05	Quartiers résidentiels	15		Patiente venue d'elle même			2014-05-18				1		0		0		TRUE	FALSE	FALSE	FALSE	FALSE	FALSE	FALSE	FALSE	FALSE	FALSE	FALSE	FALSE	160	1	Complication d'avortement provoqué	2014-05-18	Traitement médical	TRUE	FALSE	FALSE	FALSE	FALSE	FALSE	FALSE	FALSE	FALSE	TRUE	FALSE	FALSE	FALSE	FALSE
Maternité de Kintambo	Quartiers des anciennes cités	2014-02-05	Quartiers des anciennes cités	23		Patiente venue d'elle même			2014-11-09	2014-11-09 23:00:00		150	2	100	1		0		FALSE	FALSE	FALSE	TRUE	FALSE	FALSE	FALSE	FALSE	FALSE	FALSE	FALSE	FALSE	161	1	Autres diagnostics	2014-11-10	Traitement médico-chirurgical	FALSE	FALSE	TRUE	FALSE	FALSE	FALSE	TRUE	FALSE	TRUE	FALSE	FALSE	FALSE	FALSE	FALSE
Maternité de Kintambo	Quartiers des anciennes cités	2014-02-05	Quartiers résidentiels	37		Patiente venue d'elle même			2014-11-06				10		9		1		FALSE	FALSE	FALSE	FALSE	FALSE	FALSE	FALSE	FALSE	FALSE	FALSE	FALSE	TRUE	162	1	Autres diagnostics		Traitement médico-chirurgical	FALSE	FALSE	TRUE	FALSE	FALSE	FALSE	TRUE	FALSE	TRUE	FALSE	FALSE	FALSE	FALSE	FALSE
Maternité de Kintambo	Quartiers des anciennes cités	2014-02-05	Quartiers des cités planifiées	20		Patiente venue d'elle même			2014-04-18		36.7	180	3	80	0		2		FALSE	FALSE	FALSE	FALSE	FALSE	FALSE	FALSE	FALSE	FALSE	FALSE	FALSE	FALSE	163	1	Autres diagnostics	2014-04-18	Traitement médico-chirurgical	FALSE	FALSE	TRUE	FALSE	FALSE	FALSE	TRUE	FALSE	TRUE	FALSE	FALSE	TRUE	FALSE	FALSE
Maternité de Kintambo	Quartiers des anciennes cités	2014-02-05		27	Mariée	Patiente venue d'elle même			2014-11-17	2014-11-17 01:30:00			1		0		0		FALSE	FALSE	FALSE	FALSE	FALSE	FALSE	FALSE	FALSE	TRUE	TRUE	FALSE	FALSE	164	1	Autres diagnostics	2014-11-17	Traitement médico-chirurgical	FALSE	FALSE	TRUE	FALSE	FALSE	FALSE	TRUE	FALSE	TRUE	FALSE	FALSE	TRUE	FALSE	FALSE
Maternité de Kintambo	Quartiers des anciennes cités	2014-02-05	Quartiers résidentiels	35	Mariée	Patiente référée	Quartiers des anciennes cités		2014-11-14			100	5	60	3		1		FALSE	FALSE	FALSE	TRUE	FALSE	FALSE	TRUE	FALSE	FALSE	FALSE	FALSE	FALSE	165	1	Autres diagnostics		Traitement médico-chirurgical	FALSE	FALSE	TRUE	FALSE	FALSE	FALSE	TRUE	FALSE	TRUE	FALSE	FALSE	FALSE	FALSE	FALSE
Maternité de Kintambo	Quartiers des anciennes cités	2014-02-05	Quartiers des anciennes cités	22		Patiente venue d'elle même			2014-12-08	2014-12-08		140	1	90	0		0		FALSE	FALSE	FALSE	FALSE	TRUE	FALSE	FALSE	FALSE	FALSE	FALSE	FALSE	FALSE	166	1	Autres diagnostics	2014-12-08	Traitement médico-chirurgical	FALSE	FALSE	TRUE	FALSE	FALSE	FALSE	TRUE	FALSE	TRUE	FALSE	FALSE	TRUE	FALSE	FALSE
Maternité de Kintambo	Quartiers des anciennes cités	2014-02-05	Quartiers résidentiels	27		Patiente référée	Quartiers résidentiels	2014-12-24	2014-12-24			120		60					FALSE	TRUE	FALSE	FALSE	FALSE	FALSE	FALSE	FALSE	FALSE	FALSE	FALSE	FALSE	167	1	Avortement spontané	2014-12-24	Traitement médical	FALSE	FALSE	FALSE	FALSE	FALSE	FALSE	TRUE	FALSE	FALSE	TRUE	FALSE	FALSE	FALSE	FALSE
Maternité de Kintambo	Quartiers des anciennes cités	2014-02-05	Quartiers résidentiels	32		Patiente venue d'elle même			2014-12-15	2014-12-15 13:25:00		120		80					FALSE	FALSE	FALSE	FALSE	TRUE	FALSE	FALSE	FALSE	FALSE	FALSE	FALSE	FALSE	168	1	Autres diagnostics	2014-12-15	Traitement médico-chirurgical	FALSE	FALSE	FALSE	FALSE	FALSE	FALSE	FALSE	FALSE	FALSE	TRUE	FALSE	TRUE	FALSE	FALSE
Maternité de Kintambo	Quartiers des anciennes cités	2014-02-05	Quartiers excentriques et d'extension	37		Patiente venue d'elle même			2014-11-29				4		1		2		FALSE	TRUE	FALSE	FALSE	FALSE	FALSE	FALSE	FALSE	FALSE	FALSE	FALSE	FALSE	169	1	Avortement spontané	2014-11-29	Traitement médical	FALSE	FALSE	TRUE	FALSE	FALSE	FALSE	FALSE	FALSE	FALSE	TRUE	FALSE	FALSE	FALSE	FALSE
Maternité de Kintambo	Quartiers des anciennes cités	2014-02-05		19		Patiente venue d'elle même			2014-11-09	2014-11-09 00:30:00		100	2	60	0		2		FALSE	FALSE	FALSE	FALSE	FALSE	FALSE	FALSE	FALSE	FALSE	FALSE	FALSE	FALSE	170	1	Autres diagnostics		Traitement médico-chirurgical	FALSE	FALSE	FALSE	FALSE	FALSE	FALSE	TRUE	FALSE	TRUE	TRUE	FALSE	FALSE	TRUE	FALSE
Maternité de Kintambo	Quartiers des anciennes cités	2014-02-05	Quartiers résidentiels	29	Mariée	Patiente venue d'elle même			2014-11-11			100	4	60	1		2		FALSE	FALSE	FALSE	TRUE	FALSE	FALSE	FALSE	FALSE	FALSE	FALSE	FALSE	FALSE	171	1	Autres diagnostics	2014-11-11	Traitement médico-chirurgical	FALSE	FALSE	TRUE	FALSE	FALSE	FALSE	TRUE	FALSE	TRUE	FALSE	FALSE	FALSE	FALSE	FALSE
Maternité de Kintambo	Quartiers des anciennes cités	2014-02-05	Quartiers des cités planifiées	22		Patiente venue d'elle même			2014-10-23	2014-10-23 16:50:00		110		70				80	FALSE	FALSE	FALSE	FALSE	FALSE	FALSE	FALSE	FALSE	FALSE	FALSE	FALSE	FALSE	172	1	Autres diagnostics	2014-10-23	Traitement médico-chirurgical	FALSE	FALSE	FALSE	FALSE	FALSE	FALSE	FALSE	FALSE	FALSE	TRUE	FALSE	FALSE	FALSE	FALSE
Maternité de Kintambo	Quartiers des anciennes cités	2014-02-05	Quartiers des cités planifiées	25	Mariée	Patiente venue d'elle même			2014-12-20	2014-12-20 00:10:00		140	1	90	1		0		FALSE	FALSE	FALSE	FALSE	FALSE	FALSE	FALSE	FALSE	TRUE	FALSE	FALSE	FALSE	173	1	Autres diagnostics	2014-12-20	Traitement médico-chirurgical	FALSE	FALSE	TRUE	FALSE	FALSE	FALSE	TRUE	FALSE	TRUE	TRUE	FALSE	FALSE	FALSE	FALSE
Maternité de Kintambo	Quartiers des anciennes cités	2014-02-05	Quartiers des cités planifiées	31		Patiente venue d'elle même			2014-10-15			90	3	70	2		1	88	TRUE	FALSE	FALSE	FALSE	FALSE	FALSE	FALSE	FALSE	FALSE	FALSE	FALSE	FALSE	174	1	Complication d'avortement provoqué	2014-10-15	Traitement médico-chirurgical	FALSE	FALSE	TRUE	FALSE	FALSE	FALSE	FALSE	FALSE	TRUE	FALSE	FALSE	FALSE	FALSE	FALSE
Maternité de Kintambo	Quartiers des anciennes cités	2014-02-05	Quartiers résidentiels	27		Patiente venue d'elle même			2014-10-08				2		0		1		FALSE	FALSE	FALSE	FALSE	FALSE	FALSE	TRUE	FALSE	FALSE	FALSE	FALSE	FALSE	175	1	Autres diagnostics	2014-10-08	Traitement médico-chirurgical	FALSE	FALSE	FALSE	FALSE	FALSE	FALSE	FALSE	FALSE	FALSE	TRUE	FALSE	FALSE	FALSE	FALSE
Maternité de Kintambo	Quartiers des anciennes cités	2014-02-05	Quartiers des cités planifiées	31		Patiente venue d'elle même			2014-10-05			160	8	90	1		7		FALSE	FALSE	FALSE	TRUE	FALSE	FALSE	FALSE	FALSE	FALSE	FALSE	FALSE	FALSE	176	1	Autres diagnostics	2014-10-05	Traitement médico-chirurgical	FALSE	FALSE	TRUE	FALSE	FALSE	FALSE	TRUE	FALSE	TRUE	FALSE	FALSE	FALSE	FALSE	FALSE
Maternité de Kintambo	Quartiers des anciennes cités	2014-02-05	Quartiers résidentiels	32		Patiente venue d'elle même			2014-10-15	2014-10-15 20:10:00			1		0		0		FALSE	FALSE	FALSE	FALSE	FALSE	FALSE	FALSE	FALSE	FALSE	TRUE	FALSE	FALSE	177	1	Autres diagnostics	2014-10-16	Traitement médico-chirurgical	FALSE	FALSE	TRUE	FALSE	FALSE	FALSE	TRUE	FALSE	FALSE	FALSE	FALSE	TRUE	FALSE	FALSE
Maternité de Kintambo	Quartiers des anciennes cités	2014-02-05	Quartiers des cités planifiées	34		Patiente référée	Quartiers des anciennes cités	2014-09-21	2014-09-21	2014-09-21 22:30:00	36.7	160	2	100	1		0		FALSE	FALSE	FALSE	FALSE	TRUE	FALSE	FALSE	FALSE	TRUE	FALSE	FALSE	FALSE	178	1	Autres diagnostics	2014-09-21	Traitement médico-chirurgical	TRUE	FALSE	FALSE	FALSE	FALSE	FALSE	TRUE	TRUE	TRUE	FALSE	FALSE	FALSE	FALSE	FALSE
Maternité de Kintambo	Quartiers des anciennes cités	2015-02-05	Quartiers excentriques et d'extension	41		Patiente venue d'elle même			2014-10-10			120		70				97	FALSE	FALSE	FALSE	FALSE	FALSE	FALSE	FALSE	FALSE	FALSE	FALSE	TRUE	FALSE	179	1	Autres diagnostics	2014-10-10	Traitement médico-chirurgical	FALSE	TRUE	TRUE	FALSE	FALSE	FALSE	FALSE	FALSE	TRUE	FALSE	FALSE	TRUE	FALSE	FALSE
HGR de Kinkolé	Quartiers semi-ruraux	2015-02-02	Quartiers semi-ruraux	42	Mariée	Patiente référée	Quartiers semi-ruraux	2014-03-30	2014-03-30	2014-03-30 08:00:00		130	5	80	3		1	78	TRUE	FALSE	FALSE	FALSE	FALSE	FALSE	FALSE	FALSE	FALSE	FALSE	FALSE	FALSE	180	1	Complication d'avortement provoqué	2014-03-30	Traitement médico-chirurgical	TRUE	FALSE	FALSE	FALSE	FALSE	FALSE	TRUE	FALSE	TRUE	TRUE	FALSE	FALSE	FALSE	FALSE
HGR de Kinkolé	Quartiers semi-ruraux	2015-02-02	Quartiers semi-ruraux	34		Patiente venue d'elle même			2014-01-20										FALSE	TRUE	FALSE	FALSE	FALSE	TRUE	FALSE	FALSE	FALSE	FALSE	FALSE	FALSE	181	1	Autres diagnostics	2014-01-20	Traitement médico-chirurgical	FALSE	FALSE	TRUE	FALSE	FALSE	FALSE	FALSE	FALSE	FALSE	TRUE	FALSE	FALSE	FALSE	FALSE
HGR de Kinkolé	Quartiers semi-ruraux	2015-02-02	Quartiers semi-ruraux		Celibataire	Patiente référée			2014-01-18										TRUE	FALSE	FALSE	FALSE	FALSE	FALSE	FALSE	FALSE	FALSE	FALSE	FALSE	FALSE	182	1	Complication d'avortement provoqué	2014-01-18	Traitement médico-chirurgical	FALSE	TRUE	FALSE	FALSE	FALSE	FALSE	FALSE	FALSE	FALSE	TRUE	FALSE	FALSE	FALSE	FALSE
HGR de Kinkolé	Quartiers semi-ruraux	2015-02-02	Quartiers semi-ruraux	27	Mariée	Patiente venue d'elle même			2014-01-23										FALSE	FALSE	FALSE	FALSE	FALSE	TRUE	FALSE	FALSE	FALSE	FALSE	FALSE	FALSE	183	1	Autres diagnostics	2014-01-23	Traitement médico-chirurgical	TRUE	FALSE	FALSE	FALSE	FALSE	TRUE	FALSE	FALSE	FALSE	TRUE	FALSE	FALSE	FALSE	FALSE
HGR de Kinkolé	Quartiers semi-ruraux	2015-02-02	Quartiers semi-ruraux	30					2014-01-04										FALSE	TRUE	FALSE	FALSE	FALSE	FALSE	FALSE	FALSE	FALSE	FALSE	FALSE	FALSE	184	1	Avortement spontané			FALSE	FALSE	FALSE	FALSE	FALSE	FALSE	FALSE	FALSE	FALSE	FALSE	FALSE	FALSE	FALSE	FALSE
HGR de Kinkolé	Quartiers semi-ruraux	2015-02-02	Quartiers semi-ruraux	28	Mariée	Patiente référée	Quartiers semi-ruraux	2014-03-09	2014-03-09			100	6	60	5		0		FALSE	FALSE	FALSE	FALSE	FALSE	FALSE	FALSE	FALSE	FALSE	FALSE	FALSE	FALSE	185	1	Autres diagnostics	2014-03-09	Traitement médico-chirurgical	FALSE	FALSE	TRUE	FALSE	FALSE	FALSE	FALSE	FALSE	TRUE	FALSE	FALSE	FALSE	TRUE	FALSE
HGR de Kinkolé	Quartiers semi-ruraux	2015-02-02	Quartiers semi-ruraux	19		Patiente venue d'elle même			2014-01-23										FALSE	TRUE	FALSE	FALSE	FALSE	FALSE	FALSE	FALSE	FALSE	FALSE	FALSE	FALSE	186	1	Avortement spontané		Traitement médico-chirurgical	FALSE	FALSE	FALSE	FALSE	FALSE	FALSE	FALSE	FALSE	FALSE	FALSE	FALSE	FALSE	FALSE	FALSE
HGR de Kinkolé	Quartiers semi-ruraux	2015-02-02	Quartiers semi-ruraux	40		Patiente référée	Quartiers semi-ruraux	2014-02-09	2014-02-09	2014-02-09 15:35:00		90		50					FALSE	FALSE	FALSE	FALSE	FALSE	FALSE	FALSE	FALSE	FALSE	FALSE	FALSE	FALSE	187	1	Autres diagnostics	2014-02-09	Traitement médical	FALSE	FALSE	TRUE	FALSE	FALSE	FALSE	TRUE	FALSE	FALSE	FALSE	TRUE	FALSE	FALSE	FALSE
HGR de Kinkolé	Quartiers semi-ruraux	2015-02-02	Quartiers semi-ruraux	18	Celibataire	Patiente venue d'elle même			2014-02-06			110	1	80	0		0		FALSE	FALSE	FALSE	FALSE	FALSE	FALSE	FALSE	FALSE	FALSE	FALSE	FALSE	FALSE	188	1	Autres diagnostics	2014-02-06	Traitement médico-chirurgical	FALSE	FALSE	FALSE	FALSE	FALSE	FALSE	FALSE	FALSE	FALSE	FALSE	FALSE	FALSE	TRUE	FALSE
HGR de Kinkolé	Quartiers semi-ruraux	2015-02-02	Quartiers semi-ruraux	22	Celibataire	Patiente venue d'elle même			2014-02-01										FALSE	TRUE	FALSE	FALSE	FALSE	FALSE	FALSE	FALSE	FALSE	FALSE	FALSE	FALSE	189	1	Avortement spontané	2014-02-01	Traitement médico-chirurgical	FALSE	FALSE	FALSE	FALSE	FALSE	FALSE	FALSE	FALSE	FALSE	FALSE	FALSE	FALSE	FALSE	FALSE
HGR de Kinkolé	Quartiers semi-ruraux	2015-02-02	Quartiers semi-ruraux	20		Patiente venue d'elle même			2014-02-08										FALSE	TRUE	FALSE	FALSE	FALSE	FALSE	FALSE	FALSE	FALSE	FALSE	FALSE	FALSE	190	1	Avortement spontané	2014-02-08	Traitement médico-chirurgical	FALSE	FALSE	FALSE	FALSE	FALSE	FALSE	FALSE	FALSE	FALSE	FALSE	FALSE	FALSE	FALSE	FALSE
HGR de Kinkolé	Quartiers semi-ruraux	2015-02-02	Quartiers semi-ruraux	25					2014-02-11										FALSE	FALSE	FALSE	FALSE	FALSE	FALSE	FALSE	FALSE	FALSE	FALSE	FALSE	TRUE	191	1	Autres diagnostics	2014-02-11	Traitement médical	FALSE	FALSE	TRUE	FALSE	FALSE	FALSE	FALSE	FALSE	FALSE	TRUE	FALSE	FALSE	FALSE	FALSE
HGR de Kinkolé	Quartiers semi-ruraux	2015-02-02	Quartiers semi-ruraux	18		Patiente venue d'elle même			2014-01-30										FALSE	TRUE	FALSE	FALSE	FALSE	FALSE	FALSE	FALSE	FALSE	FALSE	FALSE	FALSE	192	1	Avortement spontané	2014-01-30	Traitement médico-chirurgical	FALSE	FALSE	FALSE	FALSE	FALSE	FALSE	FALSE	FALSE	FALSE	FALSE	FALSE	FALSE	FALSE	FALSE
HGR de Kinkolé	Quartiers semi-ruraux	2015-02-02	Quartiers semi-ruraux	38					2014-02-17										TRUE	FALSE	FALSE	FALSE	FALSE	FALSE	FALSE	FALSE	FALSE	FALSE	FALSE	FALSE	193	1	Complication d'avortement provoqué	2014-02-17	Traitement médico-chirurgical	TRUE	FALSE	FALSE	FALSE	FALSE	FALSE	FALSE	FALSE	FALSE	TRUE	FALSE	FALSE	FALSE	FALSE
HGR de Kinkolé	Quartiers semi-ruraux	2015-02-02	Quartiers semi-ruraux	15					2014-02-18										TRUE	FALSE	FALSE	FALSE	FALSE	FALSE	FALSE	FALSE	FALSE	FALSE	FALSE	FALSE	194	1	Complication d'avortement provoqué	2014-02-18	Traitement médico-chirurgical	TRUE	FALSE	FALSE	TRUE	FALSE	FALSE	TRUE	FALSE	FALSE	FALSE	FALSE	FALSE	FALSE	FALSE
HGR de Kinkolé	Quartiers semi-ruraux	2015-02-02	Quartiers semi-ruraux						2014-02-20										TRUE	FALSE	FALSE	FALSE	FALSE	FALSE	FALSE	FALSE	FALSE	FALSE	FALSE	FALSE	195	1	Complication d'avortement provoqué	2014-02-20	Traitement médico-chirurgical	FALSE	FALSE	FALSE	FALSE	FALSE	FALSE	FALSE	FALSE	FALSE	FALSE	FALSE	FALSE	FALSE	FALSE
HGR de Kinkolé	Quartiers semi-ruraux	2015-02-02	Quartiers semi-ruraux	37		Patiente référée			2014-02-26										TRUE	FALSE	FALSE	FALSE	FALSE	FALSE	FALSE	FALSE	FALSE	FALSE	FALSE	FALSE	196	1	Complication d'avortement provoqué	2014-02-26	Traitement médical	FALSE	TRUE	TRUE	TRUE	FALSE	FALSE	FALSE	FALSE	FALSE	FALSE	FALSE	FALSE	FALSE	FALSE
HGR de Kinkolé	Quartiers semi-ruraux	2015-02-02	Quartiers semi-ruraux	25	Mariée	Patiente référée	Quartiers semi-ruraux	2014-03-03	2014-03-06	2014-03-06 02:50:00			3		2		0		FALSE	FALSE	FALSE	FALSE	FALSE	FALSE	FALSE	FALSE	FALSE	TRUE	FALSE	FALSE	197	1	Autres diagnostics	2014-03-08	Traitement médico-chirurgical	FALSE	FALSE	TRUE	FALSE	FALSE	FALSE	TRUE	FALSE	FALSE	FALSE	FALSE	FALSE	FALSE	FALSE
HGR de Kinkolé	Quartiers semi-ruraux	2015-02-02	Quartiers semi-ruraux	18		Patiente venue d'elle même			2014-03-13		36.3	130	1	100	0		0	128	FALSE	FALSE	FALSE	FALSE	FALSE	TRUE	FALSE	FALSE	FALSE	FALSE	FALSE	FALSE	198	1	Autres diagnostics	2014-02-18	Traitement médical	TRUE	FALSE	FALSE	FALSE	FALSE	TRUE	FALSE	FALSE	FALSE	TRUE	FALSE	FALSE	FALSE	FALSE
HGR de Kinkolé	Quartiers semi-ruraux	2015-02-02	Quartiers semi-ruraux	27		DND			2014-03-18			90	4	60	3		0		FALSE	FALSE	FALSE	FALSE	FALSE	FALSE	FALSE	FALSE	FALSE	FALSE	FALSE	FALSE	199	1	Autres diagnostics	2014-03-18	Traitement médico-chirurgical	FALSE	TRUE	TRUE	FALSE	FALSE	FALSE	TRUE	FALSE	FALSE	FALSE	FALSE	FALSE	FALSE	TRUE
HGR de Kinkolé	Quartiers semi-ruraux	2015-02-02	Quartiers semi-ruraux	21	Mariée	Patiente venue d'elle même			2014-03-21		38.5	110	4	70	2		1	132	FALSE	FALSE	FALSE	FALSE	FALSE	TRUE	FALSE	FALSE	FALSE	FALSE	FALSE	FALSE	200	1	Autres diagnostics	2014-03-22	Traitement médical	TRUE	FALSE	FALSE	FALSE	FALSE	TRUE	FALSE	FALSE	FALSE	TRUE	FALSE	FALSE	FALSE	FALSE
HGR de Kinkolé	Quartiers semi-ruraux	2015-02-02	Quartiers semi-ruraux	23	Mariée	Patiente venue d'elle même			2014-03-25	2014-03-25 17:20:00	39		1		0		0		FALSE	FALSE	FALSE	FALSE	FALSE	TRUE	FALSE	FALSE	FALSE	FALSE	FALSE	FALSE	201	1	Autres diagnostics	2014-03-26	Traitement médico-chirurgical	FALSE	FALSE	TRUE	FALSE	FALSE	FALSE	FALSE	FALSE	FALSE	TRUE	TRUE	FALSE	FALSE	FALSE
HGR de Kinkolé	Quartiers semi-ruraux	2015-02-02	Quartiers semi-ruraux	19	Mariée	Patiente référée		2014-03-16	2014-03-16										FALSE	FALSE	FALSE	FALSE	FALSE	FALSE	FALSE	FALSE	TRUE	FALSE	FALSE	FALSE	202	1	Autres diagnostics	2014-03-16	Traitement médico-chirurgical	FALSE	FALSE	TRUE	FALSE	FALSE	FALSE	TRUE	FALSE	TRUE	FALSE	FALSE	FALSE	FALSE	FALSE
HGR de Kinkolé	Quartiers semi-ruraux	2015-02-02	Quartiers semi-ruraux	27	Mariée	Patiente venue d'elle même			2014-03-11										FALSE	FALSE	FALSE	FALSE	FALSE	FALSE	FALSE	FALSE	TRUE	FALSE	FALSE	FALSE	203	1	Autres diagnostics	2014-03-11	Traitement médico-chirurgical	FALSE	TRUE	TRUE	TRUE	FALSE	FALSE	FALSE	FALSE	TRUE	FALSE	FALSE	FALSE	FALSE	FALSE
HGR de Kinkolé	Quartiers semi-ruraux	2015-02-02	Quartiers semi-ruraux	28	Mariée	Patiente venue d'elle même			2014-03-09			100	5	60	5		0	101	FALSE	FALSE	FALSE	FALSE	FALSE	FALSE	FALSE	FALSE	FALSE	FALSE	FALSE	FALSE	204	1	Autres diagnostics	2014-03-09	Traitement médico-chirurgical	FALSE	FALSE	TRUE	FALSE	FALSE	FALSE	FALSE	FALSE	TRUE	FALSE	FALSE	FALSE	TRUE	FALSE
HGR de Kinkolé	Quartiers semi-ruraux	2015-02-02	Quartiers semi-ruraux	23	Celibataire	DND			2014-03-03										TRUE	FALSE	FALSE	FALSE	FALSE	FALSE	FALSE	FALSE	FALSE	FALSE	FALSE	FALSE	205	1	Complication d'avortement provoqué	2014-03-03	Traitement médico-chirurgical	FALSE	FALSE	FALSE	FALSE	FALSE	FALSE	FALSE	FALSE	FALSE	FALSE	FALSE	FALSE	FALSE	FALSE
HGR de Kinkolé	Quartiers semi-ruraux	2015-02-02	Quartiers semi-ruraux						2014-03-03										FALSE	FALSE	FALSE	FALSE	TRUE	FALSE	FALSE	FALSE	FALSE	FALSE	FALSE	FALSE	206	1	Autres diagnostics	2014-03-03		FALSE	FALSE	FALSE	FALSE	FALSE	FALSE	FALSE	FALSE	FALSE	FALSE	FALSE	FALSE	FALSE	FALSE
HGR de Kinkolé	Quartiers semi-ruraux	2015-02-02	Quartiers semi-ruraux	21					2014-03-04										TRUE	FALSE	FALSE	FALSE	FALSE	FALSE	FALSE	FALSE	FALSE	FALSE	FALSE	FALSE	207	1	Complication d'avortement provoqué	2014-03-04	Traitement médico-chirurgical	FALSE	FALSE	FALSE	FALSE	FALSE	FALSE	FALSE	FALSE	FALSE	FALSE	FALSE	FALSE	FALSE	FALSE
HGR de Kinkolé	Quartiers semi-ruraux	2015-02-02	Quartiers semi-ruraux	21					2014-03-04										FALSE	TRUE	FALSE	FALSE	FALSE	FALSE	FALSE	FALSE	FALSE	FALSE	FALSE	FALSE	208	1	Avortement spontané	2014-03-04	Traitement médico-chirurgical	FALSE	FALSE	FALSE	FALSE	FALSE	FALSE	FALSE	FALSE	FALSE	FALSE	FALSE	FALSE	FALSE	FALSE
HGR de Kinkolé	Quartiers semi-ruraux	2015-02-02	Quartiers semi-ruraux	33					2014-03-10										FALSE	TRUE	FALSE	FALSE	FALSE	FALSE	FALSE	FALSE	FALSE	FALSE	FALSE	FALSE	209	1	Avortement spontané	2014-03-10	Traitement médico-chirurgical	FALSE	FALSE	FALSE	FALSE	FALSE	FALSE	FALSE	FALSE	FALSE	FALSE	FALSE	FALSE	FALSE	FALSE
HGR de Kinkolé	Quartiers semi-ruraux	2015-02-02	Quartiers semi-ruraux	42					2014-03-30										FALSE	FALSE	FALSE	FALSE	FALSE	FALSE	FALSE	FALSE	FALSE	FALSE	FALSE	FALSE	210	1	Autres diagnostics	2014-03-30	Traitement médico-chirurgical	FALSE	FALSE	TRUE	TRUE	FALSE	FALSE	TRUE	FALSE	FALSE	FALSE	FALSE	FALSE	TRUE	FALSE
HGR de Kinkolé	Quartiers semi-ruraux	2015-02-02	Quartiers semi-ruraux	19	Celibataire	Patiente référée	Quartiers semi-ruraux	2014-04-06	2014-04-07		37	90	1	60	1		0		FALSE	FALSE	FALSE	FALSE	FALSE	FALSE	FALSE	FALSE	FALSE	FALSE	FALSE	FALSE	211	1	Autres diagnostics	2014-04-07	Traitement médico-chirurgical	TRUE	TRUE	FALSE	TRUE	FALSE	FALSE	FALSE	FALSE	TRUE	FALSE	TRUE	FALSE	FALSE	FALSE
HGR de Kinkolé	Quartiers semi-ruraux	2015-02-02	Quartiers semi-ruraux	25	Mariée	Patiente venue d'elle même			2014-04-11		38.5	70	2	50	2		0	120	FALSE	TRUE	FALSE	FALSE	FALSE	FALSE	FALSE	FALSE	FALSE	FALSE	FALSE	FALSE	212	1	Avortement spontané	2014-04-12	Traitement médico-chirurgical	TRUE	FALSE	FALSE	TRUE	FALSE	FALSE	FALSE	FALSE	FALSE	FALSE	FALSE	TRUE	FALSE	FALSE
HGR de Kinkolé	Quartiers semi-ruraux	2015-02-02	Quartiers semi-ruraux	29					2014-04-08										FALSE	TRUE	FALSE	FALSE	FALSE	FALSE	FALSE	FALSE	FALSE	FALSE	FALSE	FALSE	213	1	Avortement spontané	2014-04-08	Traitement médico-chirurgical	FALSE	FALSE	FALSE	FALSE	FALSE	FALSE	FALSE	FALSE	FALSE	FALSE	FALSE	FALSE	FALSE	FALSE
HGR de Kinkolé	Quartiers semi-ruraux	2015-02-02	Quartiers semi-ruraux	37					2014-04-10										FALSE	FALSE	FALSE	FALSE	TRUE	FALSE	FALSE	FALSE	FALSE	FALSE	FALSE	FALSE	214	1	Autres diagnostics	2014-04-10	Traitement médical	FALSE	FALSE	FALSE	FALSE	FALSE	FALSE	FALSE	TRUE	FALSE	FALSE	FALSE	FALSE	FALSE	FALSE
HGR de Kinkolé	Quartiers semi-ruraux	2015-02-02	Quartiers semi-ruraux	25					2014-04-11										FALSE	TRUE	FALSE	FALSE	FALSE	FALSE	FALSE	FALSE	FALSE	FALSE	FALSE	FALSE	215	1	Avortement spontané	2014-04-11	Traitement médico-chirurgical	TRUE	TRUE	FALSE	FALSE	FALSE	FALSE	FALSE	FALSE	FALSE	FALSE	FALSE	FALSE	FALSE	FALSE
HGR de Kinkolé	Quartiers semi-ruraux	2015-02-02	Quartiers semi-ruraux	18					2014-02-02										FALSE	FALSE	FALSE	FALSE	FALSE	TRUE	FALSE	FALSE	FALSE	FALSE	FALSE	FALSE	216	1	Autres diagnostics	2014-02-02	Traitement médical	FALSE	FALSE	FALSE	FALSE	FALSE	TRUE	FALSE	FALSE	FALSE	FALSE	FALSE	FALSE	FALSE	FALSE
HGR de Kinkolé	Quartiers semi-ruraux	2015-02-03	Quartiers semi-ruraux	33	Mariée	Patiente référée	Quartiers semi-ruraux	2014-05-16	2014-05-16		36	100	7	60	6		0	115	FALSE	FALSE	FALSE	FALSE	FALSE	FALSE	FALSE	FALSE	FALSE	FALSE	FALSE	FALSE	217	1	Autres diagnostics	2014-05-16	Traitement médical	TRUE	FALSE	FALSE	FALSE	FALSE	FALSE	FALSE	FALSE	FALSE	TRUE	TRUE	FALSE	FALSE	FALSE
HGR de Kinkolé	Quartiers semi-ruraux	2015-02-03	Quartiers semi-ruraux	30	Mariée	Patiente venue d'elle même			2014-05-06										FALSE	FALSE	FALSE	FALSE	FALSE	FALSE	FALSE	FALSE	FALSE	FALSE	FALSE	FALSE	218	1	Autres diagnostics	2014-05-06	Traitement médical	FALSE	FALSE	FALSE	FALSE	FALSE	FALSE	FALSE	FALSE	FALSE	TRUE	TRUE	FALSE	FALSE	FALSE
HGR de Kinkolé	Quartiers semi-ruraux	2015-02-03	Quartiers semi-ruraux	29	Mariée	Patiente venue d'elle même			2014-07-13	2014-07-13 06:05:00	36.5	110		70				80	FALSE	FALSE	FALSE	FALSE	FALSE	FALSE	FALSE	FALSE	FALSE	TRUE	FALSE	FALSE	219	1	Autres diagnostics	2014-07-13	Traitement médico-chirurgical	TRUE	FALSE	FALSE	FALSE	FALSE	FALSE	TRUE	FALSE	TRUE	FALSE	FALSE	FALSE	FALSE	FALSE
HGR de Kinkolé	Quartiers semi-ruraux	2015-02-03	Quartiers semi-ruraux	30	Mariée	Patiente venue d'elle même			2014-07-06				4		3		0		TRUE	FALSE	FALSE	FALSE	FALSE	FALSE	FALSE	FALSE	FALSE	FALSE	FALSE	FALSE	220	1	Complication d'avortement provoqué	2014-07-07	Traitement médical	FALSE	FALSE	TRUE	TRUE	FALSE	FALSE	TRUE	FALSE	FALSE	FALSE	FALSE	FALSE	FALSE	FALSE
HGR de Kinkolé	Quartiers semi-ruraux	2015-02-03	Quartiers semi-ruraux	28	Mariée	Patiente référée			2014-07-21										TRUE	FALSE	FALSE	FALSE	FALSE	FALSE	FALSE	FALSE	FALSE	FALSE	FALSE	FALSE	221	1	Complication d'avortement provoqué	2014-07-21	Traitement médico-chirurgical	FALSE	FALSE	FALSE	FALSE	FALSE	FALSE	TRUE	FALSE	FALSE	FALSE	FALSE	FALSE	FALSE	FALSE
HGR de Kinkolé	Quartiers semi-ruraux	2015-02-03	Quartiers semi-ruraux	28	Mariée	Patiente référée		2014-07-26	2014-07-27			100		70					FALSE	FALSE	FALSE	FALSE	FALSE	FALSE	FALSE	FALSE	FALSE	FALSE	FALSE	TRUE	222	1	Autres diagnostics	2014-07-27	Traitement médico-chirurgical	FALSE	FALSE	TRUE	FALSE	FALSE	FALSE	FALSE	FALSE	FALSE	TRUE	FALSE	FALSE	FALSE	FALSE
HGR de Kinkolé	Quartiers semi-ruraux	2015-02-03	Quartiers semi-ruraux	36		Patiente venue d'elle même			2014-07-19	2014-07-19 20:15:00		110		80					FALSE	FALSE	FALSE	FALSE	FALSE	FALSE	FALSE	FALSE	FALSE	FALSE	FALSE	FALSE	223	1	Autres diagnostics	2014-07-19	Traitement médico-chirurgical	TRUE	FALSE	FALSE	FALSE	FALSE	FALSE	FALSE	FALSE	FALSE	TRUE	FALSE	TRUE	FALSE	TRUE
HGR de Kinkolé	Quartiers semi-ruraux	2015-02-03		28	Mariée	Patiente référée	Quartiers semi-ruraux	2014-08-13	2014-08-13				6		6		0		FALSE	FALSE	FALSE	FALSE	FALSE	FALSE	FALSE	FALSE	FALSE	FALSE	FALSE	FALSE	224	1	Autres diagnostics		Traitement médico-chirurgical	FALSE	FALSE	FALSE	FALSE	FALSE	FALSE	FALSE	FALSE	FALSE	FALSE	FALSE	FALSE	FALSE	FALSE
HGR de Kinkolé	Quartiers semi-ruraux	2015-02-03	Quartiers semi-ruraux	22	Mariée	Patiente référée		2014-09-01	2014-09-01	2014-09-01 06:30:00		90	3	60	2		0		FALSE	FALSE	FALSE	FALSE	FALSE	FALSE	FALSE	FALSE	FALSE	FALSE	FALSE	FALSE	225	1	Autres diagnostics	2014-09-01	Traitement médico-chirurgical	FALSE	FALSE	TRUE	FALSE	FALSE	FALSE	TRUE	FALSE	FALSE	TRUE	FALSE	FALSE	FALSE	FALSE
HGR de Kinkolé	Quartiers semi-ruraux	2015-02-03	Quartiers semi-ruraux	36					2014-07-19										FALSE	FALSE	FALSE	FALSE	FALSE	FALSE	FALSE	FALSE	FALSE	FALSE	FALSE	FALSE	226	1	Autres diagnostics	2014-07-19	Traitement médico-chirurgical	FALSE	FALSE	FALSE	FALSE	FALSE	FALSE	FALSE	FALSE	FALSE	FALSE	FALSE	FALSE	FALSE	TRUE
Maternité de Kintambo	Quartiers des cités planifiées	2015-02-18	Quartiers résidentiels	39		Patiente référée	Quartiers résidentiels	2014-05-05	2014-05-05	2014-05-05 11:00:00	36.1	120	9	80	5		3		FALSE	FALSE	FALSE	FALSE	TRUE	FALSE	FALSE	FALSE	FALSE	FALSE	FALSE	FALSE	227	1	Autres diagnostics	2014-05-06	Traitement médico-chirurgical	FALSE	FALSE	TRUE	FALSE	FALSE	FALSE	TRUE	FALSE	TRUE	FALSE	FALSE	FALSE	FALSE	FALSE
Maternité de Kintambo	Quartiers des cités planifiées	2015-02-18	Quartiers des cités planifiées	29		Patiente référée			2014-05-08				3		0		2		FALSE	FALSE	FALSE	FALSE	FALSE	FALSE	FALSE	FALSE	FALSE	FALSE	FALSE	FALSE	228	1	Autres diagnostics	2014-05-08	Traitement médico-chirurgical	TRUE	FALSE	FALSE	FALSE	FALSE	FALSE	TRUE	FALSE	FALSE	FALSE	FALSE	TRUE	FALSE	FALSE
Maternité de Kintambo	Quartiers des cités planifiées	2015-02-18	Quartiers résidentiels	34	Mariée	Patiente référée			2014-05-03	2014-05-03 18:00:00	37	80	1	50	0		0		FALSE	FALSE	FALSE	FALSE	FALSE	FALSE	FALSE	FALSE	FALSE	FALSE	FALSE	FALSE	229	1	Autres diagnostics	2014-05-05	Traitement médico-chirurgical	FALSE	FALSE	TRUE	FALSE	FALSE	FALSE	TRUE	FALSE	FALSE	FALSE	FALSE	TRUE	FALSE	FALSE
Maternité de Kintambo	Quartiers des cités planifiées	2015-02-18	Quartiers résidentiels	38	Mariée	Patiente référée	Quartiers résidentiels	2014-05-30	2014-05-30	2014-05-30 01:30:00		110	3	70	2		0		FALSE	FALSE	FALSE	FALSE	FALSE	FALSE	FALSE	FALSE	TRUE	FALSE	FALSE	FALSE	230	1	Autres diagnostics	2014-05-31	Traitement médico-chirurgical	FALSE	FALSE	TRUE	FALSE	FALSE	FALSE	TRUE	FALSE	TRUE	FALSE	FALSE	FALSE	FALSE	FALSE
Maternité de Kintambo	Quartiers des cités planifiées	2015-02-18	Quartiers semi-ruraux	40	Celibataire	Patiente venue d'elle même			2014-06-14			110		70					FALSE	FALSE	FALSE	FALSE	FALSE	FALSE	FALSE	FALSE	FALSE	FALSE	FALSE	TRUE	231	1	Autres diagnostics	2014-06-14	Traitement médico-chirurgical	FALSE	FALSE	TRUE	FALSE	FALSE	FALSE	FALSE	FALSE	TRUE	FALSE	FALSE	FALSE	FALSE	FALSE
Maternité de Kintambo	Quartiers des cités planifiées	2015-02-18	Quartiers excentriques et d'extension	40		Patiente venue d'elle même			2014-05-28	2014-05-28 13:30:00		130	4	110	3		0		FALSE	FALSE	FALSE	TRUE	FALSE	FALSE	FALSE	FALSE	FALSE	FALSE	FALSE	FALSE	232	1	Autres diagnostics		Traitement médico-chirurgical	FALSE	FALSE	TRUE	FALSE	FALSE	FALSE	TRUE	FALSE	TRUE	FALSE	FALSE	FALSE	FALSE	FALSE
Maternité de Kintambo	Quartiers des cités planifiées	2015-02-18	Quartiers résidentiels	43	Mariée	Patiente référée	Quartiers résidentiels		2014-05-15			130	11	60	10		0		FALSE	FALSE	FALSE	FALSE	FALSE	FALSE	FALSE	FALSE	FALSE	TRUE	FALSE	FALSE	233	1	Autres diagnostics	2014-05-15	Traitement médico-chirurgical	FALSE	FALSE	FALSE	FALSE	TRUE	FALSE	TRUE	FALSE	TRUE	FALSE	FALSE	TRUE	FALSE	FALSE
Maternité de Kintambo	Quartiers des cités planifiées	2015-02-18	Quartiers résidentiels	41	DND	Patiente référée	Quartiers résidentiels	2014-05-06	2014-05-06	2014-05-06 00:30:00			8		7		0		FALSE	FALSE	FALSE	TRUE	FALSE	FALSE	FALSE	FALSE	FALSE	FALSE	FALSE	FALSE	234	1	Autres diagnostics	2014-05-08	Traitement médico-chirurgical	FALSE	FALSE	FALSE	FALSE	FALSE	FALSE	TRUE	FALSE	FALSE	TRUE	FALSE	TRUE	FALSE	FALSE
Maternité de Kintambo	Quartiers des cités planifiées	2015-02-18	Quartiers résidentiels	37	Mariée	Patiente venue d'elle même			2014-06-06			130		80					FALSE	FALSE	FALSE	TRUE	FALSE	FALSE	FALSE	FALSE	FALSE	FALSE	FALSE	FALSE	235	1	Autres diagnostics	2014-06-06	Traitement médico-chirurgical	FALSE	FALSE	TRUE	FALSE	FALSE	FALSE	TRUE	FALSE	TRUE	FALSE	FALSE	FALSE	FALSE	FALSE
Maternité de Kintambo	Quartiers des cités planifiées	2015-02-18	Quartiers des cités planifiées			Patiente venue d'elle même			2014-02-10	2014-02-10 10:15:00			3		1		1		TRUE	FALSE	FALSE	FALSE	FALSE	FALSE	FALSE	FALSE	FALSE	FALSE	FALSE	FALSE	236	1	Complication d'avortement provoqué	2014-02-10	Traitement médical	FALSE	FALSE	TRUE	TRUE	FALSE	FALSE	TRUE	FALSE	FALSE	FALSE	FALSE	FALSE	FALSE	FALSE
Maternité de Kintambo	Quartiers des cités planifiées	2015-02-18	Quartiers des cités planifiées	36	Mariée	Patiente venue d'elle même			2014-06-09			170	1	100	0		0		FALSE	FALSE	FALSE	FALSE	TRUE	FALSE	FALSE	FALSE	FALSE	FALSE	FALSE	FALSE	237	1	Autres diagnostics	2014-06-09	Traitement médico-chirurgical	FALSE	FALSE	TRUE	FALSE	FALSE	FALSE	TRUE	FALSE	TRUE	FALSE	FALSE	FALSE	FALSE	FALSE
Maternité de Kintambo	Quartiers des cités planifiées	2015-02-17	Quartiers des cités planifiées	30	Mariée	Patiente venue d'elle même			2014-03-03				1		1		0		FALSE	FALSE	FALSE	FALSE	FALSE	FALSE	FALSE	FALSE	TRUE	FALSE	FALSE	FALSE	238	1	Autres diagnostics	2014-03-05	Traitement médico-chirurgical	FALSE	FALSE	TRUE	FALSE	FALSE	FALSE	TRUE	FALSE	TRUE	FALSE	FALSE	FALSE	FALSE	FALSE
Maternité de Kintambo	Quartiers des cités planifiées	2015-02-17	Quartiers résidentiels	37		Patiente venue d'elle même			2014-04-17			100		70					FALSE	FALSE	FALSE	FALSE	FALSE	FALSE	FALSE	FALSE	FALSE	FALSE	TRUE	FALSE	239	1	Autres diagnostics	2014-04-17	Traitement médico-chirurgical	FALSE	FALSE	TRUE	FALSE	FALSE	FALSE	TRUE	FALSE	TRUE	FALSE	FALSE	TRUE	FALSE	FALSE
Maternité de Kintambo	Quartiers des cités planifiées	2015-02-17	Quartiers résidentiels	42	DND	Patiente référée	Quartiers semi-ruraux		2014-09-16	2014-09-16 15:20:00		100	3	60	2		1		FALSE	FALSE	FALSE	FALSE	FALSE	FALSE	FALSE	FALSE	FALSE	FALSE	FALSE	FALSE	240	1	Autres diagnostics			FALSE	FALSE	TRUE	FALSE	FALSE	FALSE	TRUE	FALSE	TRUE	FALSE	FALSE	TRUE	FALSE	FALSE
Maternité de Kintambo	Quartiers des cités planifiées	2015-02-17	Quartiers des cités planifiées	31	Mariée	Patiente référée			2014-03-22	2013-03-22 23:00:00		110	3	70	2		0		FALSE	FALSE	FALSE	FALSE	FALSE	FALSE	FALSE	FALSE	FALSE	FALSE	FALSE	FALSE	241	1	Autres diagnostics	2014-03-23	Traitement médico-chirurgical	FALSE	FALSE	TRUE	FALSE	FALSE	FALSE	TRUE	FALSE	TRUE	FALSE	FALSE	TRUE	FALSE	FALSE
Maternité de Kintambo	Quartiers des cités planifiées	2015-02-17	Quartiers des cités planifiées	29		Patiente référée			2014-01-07	2014-01-07 09:35:00		90	3	50	2		0	88	FALSE	FALSE	FALSE	FALSE	FALSE	FALSE	FALSE	FALSE	FALSE	FALSE	FALSE	FALSE	242	1	Autres diagnostics	2014-01-07	Traitement médico-chirurgical	FALSE	FALSE	TRUE	FALSE	FALSE	FALSE	TRUE	FALSE	TRUE	FALSE	FALSE	TRUE	FALSE	TRUE
Maternité de Kintambo	Quartiers des cités planifiées	2015-02-17	Quartiers résidentiels	40	Mariée	Patiente venue d'elle même			2014-03-18			160	5	110	3		1		FALSE	FALSE	FALSE	FALSE	TRUE	FALSE	FALSE	FALSE	FALSE	FALSE	FALSE	FALSE	243	1	Autres diagnostics	2014-03-18	Traitement médico-chirurgical	FALSE	FALSE	TRUE	FALSE	FALSE	FALSE	TRUE	FALSE	FALSE	FALSE	FALSE	FALSE	FALSE	FALSE
Maternité de Kintambo	Quartiers des cités planifiées	2015-02-17	Quartiers résidentiels	25	Mariée	Patiente venue d'elle même			2014-03-19			140	1	100	0		0		FALSE	FALSE	FALSE	FALSE	TRUE	FALSE	FALSE	FALSE	FALSE	FALSE	FALSE	FALSE	244	1	Autres diagnostics	2014-03-19	Traitement médico-chirurgical	FALSE	FALSE	TRUE	FALSE	FALSE	FALSE	TRUE	FALSE	TRUE	FALSE	FALSE	FALSE	FALSE	FALSE
Maternité de Kintambo	Quartiers des cités planifiées	2015-02-17	Quartiers des cités planifiées	22		Patiente venue d'elle même			2014-03-24	2014-03-24 10:40:00		120	1	80	0	22	0		FALSE	FALSE	FALSE	FALSE	FALSE	FALSE	FALSE	FALSE	FALSE	FALSE	FALSE	FALSE	245	1	Autres diagnostics	2014-03-24	Traitement médico-chirurgical	FALSE	FALSE	TRUE	FALSE	FALSE	FALSE	TRUE	TRUE	TRUE	FALSE	FALSE	TRUE	FALSE	FALSE
Maternité de Kintambo	Quartiers des cités planifiées	2015-02-17	Quartiers des cités planifiées	25		Patiente venue d'elle même			2014-04-30	2014-04-30 13:45:00		120	2	80	1		0		FALSE	FALSE	FALSE	TRUE	FALSE	FALSE	FALSE	FALSE	FALSE	FALSE	FALSE	FALSE	246	1	Autres diagnostics	2014-04-30	Traitement médico-chirurgical	FALSE	FALSE	TRUE	FALSE	FALSE	FALSE	TRUE	FALSE	TRUE	FALSE	FALSE	FALSE	FALSE	FALSE
Maternité de Kintambo	Quartiers des cités planifiées	2015-02-17	Quartiers résidentiels	31	Mariée	Patiente venue d'elle même			2014-05-09		36	90	5	70	2		2		FALSE	FALSE	FALSE	TRUE	FALSE	FALSE	FALSE	FALSE	FALSE	FALSE	FALSE	FALSE	247	1	Autres diagnostics	2014-05-10	Traitement médico-chirurgical	FALSE	FALSE	TRUE	FALSE	FALSE	FALSE	TRUE	FALSE	TRUE	FALSE	FALSE	TRUE	FALSE	FALSE
Maternité de Kintambo	Quartiers des cités planifiées	2015-02-17	Quartiers des cités planifiées	37		Patiente référée	Quartiers des cités planifiées	2014-04-20	2014-04-20	2014-04-20 03:40:00	36	100	2	70	1		0		FALSE	FALSE	FALSE	FALSE	FALSE	FALSE	FALSE	FALSE	TRUE	FALSE	FALSE	FALSE	248	1	Autres diagnostics	2014-04-20	Traitement médico-chirurgical	FALSE	FALSE	TRUE	FALSE	FALSE	FALSE	TRUE	FALSE	TRUE	FALSE	FALSE	TRUE	FALSE	FALSE
Maternité de Kintambo	Quartiers des cités planifiées	2015-02-17	Quartiers résidentiels	19	Mariée	Patiente venue d'elle même			2014-03-15			150	1	60	0		0		FALSE	FALSE	FALSE	FALSE	TRUE	FALSE	FALSE	FALSE	FALSE	FALSE	FALSE	FALSE	249	1	Autres diagnostics	2014-03-15	Traitement médico-chirurgical	FALSE	FALSE	TRUE	FALSE	FALSE	FALSE	TRUE	TRUE	TRUE	FALSE	FALSE	TRUE	FALSE	FALSE
Maternité de Kintambo	Quartiers des cités planifiées	2015-02-17	Quartiers résidentiels	30		Patiente référée		2014-03-21	2014-03-21	2014-03-21 11:39:00	36	120		70					FALSE	FALSE	FALSE	FALSE	FALSE	FALSE	FALSE	FALSE	TRUE	FALSE	FALSE	FALSE	250	1	Autres diagnostics	2014-03-21	Traitement médico-chirurgical	FALSE	FALSE	TRUE	FALSE	FALSE	FALSE	TRUE	FALSE	FALSE	FALSE	FALSE	TRUE	FALSE	FALSE
Maternité de Kintambo	Quartiers des cités planifiées	2015-02-17	Quartiers résidentiels	43		Patiente venue d'elle même			2014-04-18										FALSE	FALSE	FALSE	FALSE	FALSE	FALSE	FALSE	FALSE	FALSE	FALSE	FALSE	TRUE	251	1	Autres diagnostics	2014-04-18	Traitement médico-chirurgical	FALSE	FALSE	TRUE	FALSE	FALSE	FALSE	TRUE	FALSE	TRUE	FALSE	FALSE	FALSE	FALSE	FALSE
Maternité de Kintambo	Quartiers des cités planifiées	2015-02-17	Quartiers résidentiels	30		Patiente venue d'elle même			2014-03-19			120	4	70	3		0		FALSE	FALSE	FALSE	TRUE	FALSE	FALSE	FALSE	FALSE	FALSE	FALSE	FALSE	FALSE	252	1	Autres diagnostics		Traitement médico-chirurgical	FALSE	FALSE	TRUE	FALSE	FALSE	FALSE	TRUE	FALSE	TRUE	FALSE	FALSE	FALSE	FALSE	FALSE
Maternité de Kintambo	Quartiers des cités planifiées	2015-02-17	Quartiers des cités planifiées	24		Patiente venue d'elle même			2014-03-18	2014-03-18 08:45:00	36	120	2	70	0		1		FALSE	FALSE	FALSE	FALSE	FALSE	FALSE	FALSE	FALSE	FALSE	FALSE	FALSE	FALSE	253	1	Autres diagnostics	2014-04-07	Traitement médico-chirurgical	FALSE	FALSE	TRUE	FALSE	FALSE	FALSE	TRUE	FALSE	TRUE	FALSE	FALSE	FALSE	FALSE	FALSE
Clinique de la Mongala	Quartiers résidentiels	2015-03-12	Quartiers excentriques et d'extension		DND				2014-02-23										TRUE	FALSE	FALSE	FALSE	FALSE	FALSE	FALSE	FALSE	FALSE	FALSE	FALSE	FALSE	254	1	Complication d'avortement provoqué	2014-02-23	Traitement médico-chirurgical	FALSE	FALSE	TRUE	FALSE	FALSE	FALSE	FALSE	FALSE	FALSE	FALSE	FALSE	TRUE	FALSE	FALSE
Clinique de la Mongala	Quartiers résidentiels	2015-03-12	Quartiers résidentiels	27					2014-02-05										TRUE	FALSE	FALSE	FALSE	FALSE	FALSE	FALSE	FALSE	FALSE	FALSE	FALSE	FALSE	255	1	Complication d'avortement provoqué	2014-02-05	Traitement médico-chirurgical	FALSE	FALSE	TRUE	FALSE	FALSE	FALSE	FALSE	FALSE	FALSE	FALSE	FALSE	TRUE	FALSE	FALSE
Clinique de la Mongala	Quartiers résidentiels	2015-03-12	Quartiers des cités planifiées			Patiente venue d'elle même			2014-02-04										FALSE	FALSE	FALSE	FALSE	FALSE	FALSE	FALSE	FALSE	FALSE	FALSE	FALSE	TRUE	256	1	Autres diagnostics	2014-02-04	Traitement médico-chirurgical	FALSE	FALSE	FALSE	FALSE	FALSE	FALSE	FALSE	FALSE	FALSE	FALSE	FALSE	FALSE	FALSE	FALSE
Clinique de la Mongala	Quartiers résidentiels	2015-03-12	Quartiers résidentiels	27		Patiente venue d'elle même			2014-01-24										FALSE	TRUE	FALSE	FALSE	FALSE	FALSE	FALSE	FALSE	FALSE	FALSE	FALSE	FALSE	257	1	Avortement spontané		Traitement médico-chirurgical	FALSE	FALSE	FALSE	FALSE	FALSE	FALSE	FALSE	FALSE	FALSE	FALSE	FALSE	FALSE	FALSE	FALSE
Clinique de la Mongala	Quartiers résidentiels	2015-03-12	Quartiers des cités planifiées	32		Patiente venue d'elle même			2014-01-24										FALSE	TRUE	FALSE	FALSE	FALSE	FALSE	FALSE	FALSE	FALSE	FALSE	FALSE	FALSE	258	1	Avortement spontané		Traitement médico-chirurgical	FALSE	FALSE	TRUE	FALSE	FALSE	FALSE	FALSE	FALSE	FALSE	FALSE	FALSE	TRUE	FALSE	FALSE
Clinique de la Mongala	Quartiers résidentiels	2015-03-12		28		Patiente venue d'elle même			2014-01-15										FALSE	TRUE	FALSE	FALSE	FALSE	FALSE	FALSE	FALSE	FALSE	FALSE	FALSE	FALSE	259	1	Avortement spontané			FALSE	FALSE	FALSE	FALSE	FALSE	FALSE	FALSE	FALSE	FALSE	FALSE	FALSE	FALSE	FALSE	FALSE
Clinique de la Mongala	Quartiers résidentiels	2015-03-12		25		Patiente venue d'elle même			2014-01-06										FALSE	TRUE	FALSE	FALSE	FALSE	FALSE	FALSE	FALSE	FALSE	FALSE	FALSE	FALSE	260	1	Avortement spontané	2014-01-06	Traitement médico-chirurgical	FALSE	FALSE	FALSE	FALSE	FALSE	FALSE	FALSE	FALSE	FALSE	FALSE	FALSE	FALSE	FALSE	FALSE
Clinique de la Mongala	Quartiers résidentiels	2015-03-12		32		Patiente venue d'elle même			2014-03-03										FALSE	TRUE	FALSE	FALSE	FALSE	FALSE	FALSE	FALSE	FALSE	FALSE	FALSE	FALSE	261	1	Avortement spontané	2014-03-03	Traitement médico-chirurgical	FALSE	FALSE	TRUE	FALSE	FALSE	FALSE	FALSE	FALSE	FALSE	FALSE	FALSE	TRUE	FALSE	FALSE
Clinique de la Mongala	Quartiers résidentiels	2015-03-12	Quartiers des cités planifiées	41		Patiente venue d'elle même			2014-01-03										FALSE	TRUE	FALSE	FALSE	FALSE	FALSE	FALSE	FALSE	FALSE	FALSE	FALSE	FALSE	262	1	Avortement spontané	2014-03-03	Traitement médico-chirurgical	FALSE	FALSE	TRUE	FALSE	FALSE	FALSE	FALSE	FALSE	FALSE	FALSE	FALSE	TRUE	FALSE	FALSE
Clinique de la Mongala	Quartiers résidentiels	2015-03-12	Quartiers résidentiels	31		Patiente venue d'elle même			2014-01-02										FALSE	TRUE	FALSE	FALSE	FALSE	FALSE	FALSE	FALSE	FALSE	FALSE	FALSE	FALSE	263	1	Avortement spontané			FALSE	FALSE	FALSE	FALSE	FALSE	FALSE	FALSE	FALSE	FALSE	FALSE	FALSE	FALSE	FALSE	FALSE
Clinique de la Mongala	Quartiers résidentiels	2015-03-09	Quartiers résidentiels	30		Patiente venue d'elle même			2014-08-30										FALSE	FALSE	FALSE	FALSE	FALSE	FALSE	FALSE	FALSE	TRUE	FALSE	FALSE	FALSE	264	1	Autres diagnostics	2014-08-30	Traitement médico-chirurgical	FALSE	FALSE	TRUE	FALSE	FALSE	FALSE	FALSE	FALSE	FALSE	FALSE	FALSE	TRUE	FALSE	FALSE
Clinique de la Mongala	Quartiers résidentiels	2015-03-09	Quartiers des anciennes cités	30		Patiente venue d'elle même			2014-09-02										FALSE	FALSE	FALSE	TRUE	FALSE	FALSE	FALSE	FALSE	FALSE	TRUE	FALSE	FALSE	265	1	Autres diagnostics	2014-09-02	Traitement médico-chirurgical	FALSE	FALSE	TRUE	FALSE	FALSE	FALSE	FALSE	FALSE	FALSE	FALSE	FALSE	TRUE	FALSE	FALSE
Clinique de la Mongala	Quartiers résidentiels	2015-03-09	Quartiers des anciennes cités	28		Patiente venue d'elle même			2014-09-05										FALSE	FALSE	FALSE	FALSE	FALSE	FALSE	FALSE	FALSE	FALSE	FALSE	FALSE	FALSE	266	1	Autres diagnostics	2014-09-05	Traitement médico-chirurgical	FALSE	FALSE	TRUE	FALSE	FALSE	FALSE	FALSE	FALSE	FALSE	FALSE	FALSE	TRUE	FALSE	FALSE
Clinique de la Mongala	Quartiers résidentiels	2015-03-09	Quartiers des anciennes cités	26		Patiente venue d'elle même			2014-08-23										FALSE	FALSE	FALSE	FALSE	FALSE	FALSE	FALSE	FALSE	TRUE	FALSE	FALSE	FALSE	267	1	Autres diagnostics	2014-08-23	Traitement médico-chirurgical	FALSE	FALSE	TRUE	FALSE	FALSE	FALSE	FALSE	FALSE	FALSE	FALSE	FALSE	TRUE	FALSE	FALSE
Clinique de la Mongala	Quartiers résidentiels	2015-03-09	Quartiers résidentiels	27		Patiente venue d'elle même			2014-08-26										FALSE	FALSE	FALSE	FALSE	FALSE	FALSE	FALSE	FALSE	TRUE	FALSE	FALSE	FALSE	268	1	Autres diagnostics	2014-08-26	Traitement médico-chirurgical	FALSE	FALSE	TRUE	FALSE	FALSE	FALSE	FALSE	FALSE	FALSE	FALSE	FALSE	FALSE	FALSE	FALSE
Clinique de la Mongala	Quartiers résidentiels	2015-03-09	Quartiers des anciennes cités	27		Patiente venue d'elle même			2014-08-26										FALSE	FALSE	FALSE	FALSE	FALSE	FALSE	FALSE	FALSE	TRUE	FALSE	FALSE	FALSE	269	1	Autres diagnostics	2014-08-26	Traitement médico-chirurgical	FALSE	FALSE	TRUE	FALSE	FALSE	FALSE	FALSE	FALSE	FALSE	FALSE	FALSE	TRUE	FALSE	FALSE
Clinique de la Mongala	Quartiers résidentiels	2015-03-09	Quartiers semi-ruraux	26		Patiente venue d'elle même			2014-08-21										FALSE	FALSE	FALSE	FALSE	FALSE	FALSE	FALSE	FALSE	TRUE	FALSE	FALSE	FALSE	270	1	Autres diagnostics	2014-08-21	Traitement médico-chirurgical	FALSE	FALSE	TRUE	FALSE	FALSE	FALSE	FALSE	FALSE	FALSE	FALSE	FALSE	TRUE	FALSE	FALSE
Clinique de la Mongala	Quartiers résidentiels	2015-03-09	Quartiers des anciennes cités	28		Patiente venue d'elle même			2014-08-22										FALSE	FALSE	FALSE	FALSE	FALSE	FALSE	FALSE	FALSE	TRUE	FALSE	FALSE	FALSE	271	1	Autres diagnostics	2014-08-22	Traitement médico-chirurgical	FALSE	FALSE	TRUE	FALSE	FALSE	FALSE	FALSE	FALSE	FALSE	FALSE	FALSE	TRUE	FALSE	FALSE
Clinique de la Mongala	Quartiers résidentiels	2015-03-09	Quartiers excentriques et d'extension	39		Patiente venue d'elle même			2014-08-19										FALSE	FALSE	FALSE	FALSE	FALSE	FALSE	FALSE	FALSE	TRUE	FALSE	FALSE	FALSE	272	1	Autres diagnostics	2014-08-19	Traitement médico-chirurgical	FALSE	FALSE	FALSE	FALSE	FALSE	FALSE	FALSE	FALSE	FALSE	FALSE	FALSE	FALSE	FALSE	FALSE
Clinique de la Mongala	Quartiers résidentiels	2015-03-09	Quartiers des anciennes cités	26		Patiente venue d'elle même			2014-08-19										FALSE	FALSE	FALSE	FALSE	FALSE	FALSE	FALSE	FALSE	TRUE	FALSE	FALSE	FALSE	273	1	Autres diagnostics	2014-08-19	Traitement médico-chirurgical	FALSE	FALSE	TRUE	FALSE	FALSE	FALSE	FALSE	FALSE	FALSE	FALSE	FALSE	TRUE	FALSE	FALSE
Clinique de la Mongala	Quartiers résidentiels	2015-03-09	Quartiers résidentiels	32		Patiente venue d'elle même			2014-08-17										FALSE	FALSE	FALSE	FALSE	FALSE	FALSE	FALSE	FALSE	TRUE	FALSE	FALSE	FALSE	274	1	Autres diagnostics	2014-08-17	Traitement médico-chirurgical	FALSE	FALSE	TRUE	FALSE	FALSE	FALSE	FALSE	FALSE	FALSE	FALSE	FALSE	TRUE	FALSE	FALSE
Clinique de la Mongala	Quartiers résidentiels	2015-03-09		35		Patiente venue d'elle même			2014-08-07										FALSE	FALSE	FALSE	FALSE	FALSE	FALSE	FALSE	FALSE	TRUE	FALSE	FALSE	FALSE	275	1	Autres diagnostics	2014-08-07	Traitement médico-chirurgical	FALSE	FALSE	TRUE	FALSE	FALSE	FALSE	FALSE	FALSE	FALSE	FALSE	FALSE	TRUE	FALSE	FALSE
Clinique de la Mongala	Quartiers résidentiels	2015-03-09	Quartiers des cités planifiées	36		Patiente venue d'elle même			2014-08-06										FALSE	FALSE	FALSE	FALSE	TRUE	FALSE	FALSE	FALSE	FALSE	FALSE	FALSE	FALSE	276	1	Autres diagnostics	2014-08-06		FALSE	FALSE	FALSE	FALSE	FALSE	FALSE	FALSE	FALSE	FALSE	FALSE	FALSE	FALSE	FALSE	FALSE
Clinique de la Mongala	Quartiers résidentiels	2015-03-09	Quartiers excentriques et d'extension	33		Patiente venue d'elle même			2014-08-06										FALSE	FALSE	FALSE	TRUE	FALSE	FALSE	FALSE	FALSE	FALSE	TRUE	FALSE	FALSE	277	1	Autres diagnostics	2014-08-06	Traitement médico-chirurgical	FALSE	FALSE	TRUE	FALSE	FALSE	FALSE	FALSE	FALSE	FALSE	FALSE	FALSE	TRUE	FALSE	FALSE
Clinique de la Mongala	Quartiers résidentiels	2015-03-09	Quartiers excentriques et d'extension	36		Patiente venue d'elle même			2014-08-05										FALSE	FALSE	FALSE	FALSE	FALSE	FALSE	FALSE	FALSE	FALSE	FALSE	FALSE	FALSE	278	1	Autres diagnostics		Traitement médico-chirurgical	FALSE	FALSE	TRUE	FALSE	FALSE	FALSE	FALSE	FALSE	FALSE	FALSE	FALSE	TRUE	FALSE	FALSE
Clinique de la Mongala	Quartiers résidentiels	2015-03-09	Quartiers des cités planifiées	31		Patiente venue d'elle même			2014-08-02										FALSE	FALSE	FALSE	TRUE	FALSE	FALSE	FALSE	FALSE	FALSE	TRUE	FALSE	FALSE	279	1	Autres diagnostics	2014-08-02	Traitement médico-chirurgical	FALSE	FALSE	TRUE	FALSE	FALSE	FALSE	FALSE	FALSE	FALSE	FALSE	FALSE	TRUE	FALSE	FALSE
Clinique de la Mongala	Quartiers résidentiels	2015-03-09	Quartiers résidentiels	26		Patiente venue d'elle même			2014-07-07										FALSE	FALSE	FALSE	FALSE	FALSE	FALSE	FALSE	FALSE	FALSE	TRUE	FALSE	FALSE	280	1	Autres diagnostics	2014-07-07	Traitement médico-chirurgical	FALSE	FALSE	FALSE	FALSE	FALSE	FALSE	FALSE	FALSE	FALSE	FALSE	FALSE	FALSE	FALSE	FALSE
Clinique de la Mongala	Quartiers résidentiels	2015-03-09	Quartiers semi-ruraux	25		Patiente venue d'elle même			2014-07-07										FALSE	FALSE	FALSE	FALSE	FALSE	FALSE	FALSE	FALSE	FALSE	TRUE	FALSE	FALSE	281	1	Autres diagnostics	2014-07-07	Traitement médico-chirurgical	FALSE	FALSE	TRUE	FALSE	FALSE	FALSE	FALSE	FALSE	FALSE	FALSE	FALSE	TRUE	FALSE	FALSE
Clinique de la Mongala	Quartiers résidentiels	2015-03-09	Quartiers résidentiels	30		Patiente venue d'elle même			2014-07-11										FALSE	FALSE	FALSE	FALSE	FALSE	FALSE	FALSE	FALSE	FALSE	FALSE	FALSE	FALSE	282	1	Autres diagnostics	2014-07-11	Traitement médico-chirurgical	FALSE	FALSE	TRUE	FALSE	FALSE	FALSE	FALSE	FALSE	FALSE	FALSE	FALSE	TRUE	FALSE	FALSE
Clinique de la Mongala	Quartiers résidentiels	2015-03-09	Quartiers semi-ruraux	29		Patiente venue d'elle même			2014-07-12										FALSE	FALSE	FALSE	FALSE	FALSE	FALSE	FALSE	FALSE	FALSE	FALSE	FALSE	FALSE	283	1	Autres diagnostics	2014-07-12	Traitement médico-chirurgical	FALSE	FALSE	TRUE	FALSE	FALSE	FALSE	FALSE	FALSE	FALSE	FALSE	FALSE	TRUE	FALSE	TRUE
Clinique de la Mongala	Quartiers résidentiels	2015-03-09	Quartiers des anciennes cités	27		Patiente venue d'elle même			2014-06-18										FALSE	FALSE	FALSE	TRUE	FALSE	FALSE	FALSE	FALSE	TRUE	FALSE	FALSE	FALSE	284	1	Autres diagnostics	2014-06-18	Traitement médico-chirurgical	FALSE	FALSE	TRUE	FALSE	FALSE	FALSE	FALSE	FALSE	FALSE	FALSE	FALSE	TRUE	FALSE	FALSE
Clinique de la Mongala	Quartiers résidentiels	2015-03-09	Quartiers résidentiels	21		Patiente venue d'elle même			2014-06-19										FALSE	FALSE	FALSE	FALSE	FALSE	FALSE	FALSE	FALSE	FALSE	TRUE	FALSE	FALSE	285	1	Autres diagnostics	2014-06-19	Traitement médico-chirurgical	FALSE	FALSE	TRUE	FALSE	FALSE	FALSE	FALSE	FALSE	FALSE	FALSE	FALSE	TRUE	FALSE	FALSE
Clinique de la Mongala	Quartiers résidentiels	2015-03-09	Quartiers semi-ruraux	31		Patiente venue d'elle même			2014-06-09										FALSE	TRUE	FALSE	FALSE	FALSE	FALSE	FALSE	FALSE	TRUE	FALSE	FALSE	FALSE	286	1	Autres diagnostics	2014-06-09	Traitement médico-chirurgical	FALSE	FALSE	TRUE	FALSE	FALSE	FALSE	FALSE	FALSE	FALSE	FALSE	FALSE	TRUE	FALSE	FALSE
Clinique de la Mongala	Quartiers résidentiels	2015-03-09	Quartiers résidentiels	27		Patiente venue d'elle même			2014-06-04										FALSE	FALSE	FALSE	FALSE	FALSE	FALSE	FALSE	FALSE	FALSE	FALSE	FALSE	FALSE	287	1	Autres diagnostics	2014-06-04	Traitement médico-chirurgical	FALSE	FALSE	TRUE	FALSE	FALSE	FALSE	FALSE	FALSE	FALSE	FALSE	FALSE	TRUE	FALSE	FALSE
Clinique de la Mongala	Quartiers résidentiels	2015-03-09	Quartiers des anciennes cités	37		Patiente venue d'elle même			2014-06-02										FALSE	FALSE	FALSE	TRUE	FALSE	FALSE	FALSE	FALSE	FALSE	FALSE	FALSE	FALSE	288	1	Autres diagnostics	2014-06-02	Traitement médico-chirurgical	FALSE	FALSE	TRUE	FALSE	FALSE	FALSE	FALSE	FALSE	FALSE	FALSE	FALSE	TRUE	FALSE	FALSE
Clinique de la Mongala	Quartiers résidentiels	2015-03-09	Quartiers résidentiels	33		Patiente venue d'elle même			2014-07-22										FALSE	FALSE	FALSE	FALSE	FALSE	FALSE	FALSE	FALSE	TRUE	FALSE	FALSE	FALSE	289	1	Autres diagnostics	2014-07-22	Traitement médico-chirurgical	FALSE	FALSE	TRUE	FALSE	FALSE	FALSE	FALSE	FALSE	TRUE	FALSE	FALSE	TRUE	FALSE	FALSE
Clinique de la Mongala	Quartiers résidentiels	2015-03-09	Quartiers résidentiels	35					2014-07-22										FALSE	FALSE	FALSE	FALSE	FALSE	FALSE	FALSE	FALSE	TRUE	FALSE	FALSE	FALSE	290	1	Autres diagnostics	2014-07-22	Traitement médico-chirurgical	FALSE	FALSE	TRUE	FALSE	FALSE	FALSE	FALSE	FALSE	TRUE	FALSE	FALSE	TRUE	FALSE	FALSE
Clinique de la Mongala	Quartiers résidentiels	2015-03-09	Quartiers des anciennes cités	21		Patiente venue d'elle même			2014-07-17										FALSE	FALSE	FALSE	FALSE	FALSE	FALSE	FALSE	FALSE	TRUE	FALSE	FALSE	FALSE	291	1	Autres diagnostics	2014-07-17	Traitement médico-chirurgical	FALSE	FALSE	TRUE	FALSE	FALSE	FALSE	FALSE	FALSE	FALSE	FALSE	FALSE	TRUE	FALSE	FALSE
Clinique de la Mongala	Quartiers résidentiels	2015-03-09	Quartiers excentriques et d'extension	37		Patiente venue d'elle même			2014-07-13										FALSE	FALSE	FALSE	FALSE	FALSE	FALSE	FALSE	FALSE	TRUE	FALSE	FALSE	FALSE	292	1	Autres diagnostics		Traitement médico-chirurgical	FALSE	FALSE	TRUE	FALSE	FALSE	FALSE	FALSE	FALSE	FALSE	FALSE	FALSE	TRUE	FALSE	FALSE
Clinique de la Mongala	Quartiers résidentiels	2015-03-09	Quartiers des cités planifiées	26		Patiente venue d'elle même			2014-05-15										FALSE	FALSE	FALSE	FALSE	FALSE	FALSE	FALSE	FALSE	TRUE	FALSE	FALSE	FALSE	293	1	Autres diagnostics	2014-05-15	Traitement médico-chirurgical	FALSE	FALSE	TRUE	FALSE	FALSE	FALSE	FALSE	FALSE	FALSE	FALSE	FALSE	TRUE	FALSE	FALSE
Clinique de la Mongala	Quartiers résidentiels	2015-03-09	Quartiers résidentiels	36		Patiente venue d'elle même			2014-05-22										FALSE	FALSE	FALSE	FALSE	FALSE	FALSE	FALSE	FALSE	TRUE	FALSE	FALSE	FALSE	294	1	Autres diagnostics	2014-05-22	Traitement médico-chirurgical	FALSE	FALSE	TRUE	FALSE	FALSE	FALSE	FALSE	FALSE	FALSE	FALSE	FALSE	TRUE	FALSE	FALSE
Clinique de la Mongala	Quartiers résidentiels	2015-03-09	Quartiers des cités planifiées	25		Patiente venue d'elle même			2014-05-11										FALSE	FALSE	FALSE	FALSE	FALSE	FALSE	FALSE	FALSE	TRUE	FALSE	FALSE	FALSE	295	1	Autres diagnostics	2014-05-11	Traitement médico-chirurgical	FALSE	FALSE	TRUE	FALSE	FALSE	FALSE	FALSE	FALSE	FALSE	FALSE	FALSE	TRUE	FALSE	FALSE
Clinique de la Mongala	Quartiers résidentiels	2015-03-09		36		Patiente venue d'elle même			2014-05-22										FALSE	FALSE	FALSE	TRUE	FALSE	FALSE	FALSE	FALSE	FALSE	FALSE	FALSE	FALSE	296	1	Autres diagnostics		Traitement médico-chirurgical	FALSE	FALSE	TRUE	FALSE	FALSE	FALSE	FALSE	FALSE	FALSE	FALSE	FALSE	TRUE	FALSE	FALSE
Clinique de la Mongala	Quartiers résidentiels	2015-03-09	Quartiers des anciennes cités	33		Patiente venue d'elle même			2014-05-07										FALSE	FALSE	FALSE	TRUE	TRUE	FALSE	FALSE	FALSE	TRUE	FALSE	FALSE	FALSE	297	1	Autres diagnostics	2014-05-07	Traitement médico-chirurgical	FALSE	FALSE	TRUE	FALSE	FALSE	FALSE	FALSE	FALSE	FALSE	FALSE	FALSE	TRUE	FALSE	FALSE
Clinique de la Mongala	Quartiers résidentiels	2015-03-09	Quartiers excentriques et d'extension	38		Patiente venue d'elle même			2014-05-06										FALSE	FALSE	FALSE	FALSE	FALSE	FALSE	FALSE	FALSE	FALSE	FALSE	FALSE	FALSE	298	1	Autres diagnostics	2014-05-06	Traitement médico-chirurgical	FALSE	FALSE	TRUE	FALSE	FALSE	FALSE	FALSE	FALSE	FALSE	FALSE	FALSE	TRUE	FALSE	FALSE
Clinique de la Mongala	Quartiers résidentiels	2015-03-09	Quartiers semi-ruraux	30		Patiente venue d'elle même			2014-04-22										FALSE	FALSE	FALSE	FALSE	FALSE	FALSE	FALSE	FALSE	FALSE	FALSE	FALSE	FALSE	299	1	Autres diagnostics	2014-04-22	Traitement médico-chirurgical	FALSE	FALSE	TRUE	FALSE	FALSE	FALSE	FALSE	FALSE	FALSE	FALSE	FALSE	TRUE	FALSE	FALSE
Clinique de la Mongala	Quartiers résidentiels	2015-03-09	Quartiers des anciennes cités	34		Patiente venue d'elle même			2014-04-16										FALSE	FALSE	FALSE	FALSE	FALSE	FALSE	FALSE	FALSE	FALSE	FALSE	FALSE	FALSE	300	1	Autres diagnostics	2014-04-16	Traitement médico-chirurgical	FALSE	FALSE	TRUE	FALSE	FALSE	FALSE	FALSE	FALSE	TRUE	FALSE	FALSE	TRUE	TRUE	FALSE
Clinique de la Mongala	Quartiers résidentiels	2015-03-09	Quartiers des anciennes cités	21		Patiente venue d'elle même			2014-04-12										FALSE	FALSE	FALSE	FALSE	FALSE	FALSE	FALSE	FALSE	TRUE	FALSE	FALSE	FALSE	301	1	Autres diagnostics	2014-04-12	Traitement médico-chirurgical	FALSE	FALSE	TRUE	FALSE	FALSE	FALSE	FALSE	FALSE	FALSE	FALSE	FALSE	TRUE	FALSE	FALSE
Clinique de la Mongala	Quartiers résidentiels	2015-03-09	Quartiers des anciennes cités	46		Patiente venue d'elle même			2014-04-04										FALSE	FALSE	FALSE	FALSE	FALSE	FALSE	FALSE	FALSE	TRUE	FALSE	FALSE	FALSE	302	1	Autres diagnostics	2014-04-04	Traitement médico-chirurgical	FALSE	FALSE	TRUE	FALSE	FALSE	FALSE	FALSE	FALSE	FALSE	FALSE	FALSE	TRUE	FALSE	FALSE
Clinique de la Mongala	Quartiers résidentiels	2015-03-09	Quartiers des anciennes cités	27		Patiente venue d'elle même			2014-03-27										FALSE	FALSE	FALSE	FALSE	FALSE	FALSE	FALSE	FALSE	TRUE	FALSE	FALSE	FALSE	303	1	Autres diagnostics	2014-03-27	Traitement médico-chirurgical	FALSE	FALSE	TRUE	FALSE	FALSE	FALSE	FALSE	FALSE	FALSE	FALSE	FALSE	TRUE	FALSE	FALSE
Clinique de la Mongala	Quartiers résidentiels	2015-03-09	Quartiers semi-ruraux	28		Patiente venue d'elle même			2014-03-25										FALSE	FALSE	FALSE	TRUE	FALSE	FALSE	FALSE	FALSE	FALSE	TRUE	FALSE	FALSE	304	1	Autres diagnostics	2014-03-05	Traitement médico-chirurgical	FALSE	FALSE	TRUE	FALSE	FALSE	FALSE	FALSE	FALSE	FALSE	FALSE	FALSE	TRUE	FALSE	FALSE
Clinique de la Mongala	Quartiers résidentiels	2015-03-09	Quartiers des anciennes cités	33		Patiente venue d'elle même			2014-03-24										FALSE	FALSE	FALSE	FALSE	TRUE	FALSE	FALSE	FALSE	TRUE	FALSE	FALSE	FALSE	305	1	Autres diagnostics	2014-03-24	Traitement médico-chirurgical	FALSE	FALSE	FALSE	FALSE	FALSE	FALSE	FALSE	FALSE	FALSE	FALSE	FALSE	FALSE	FALSE	FALSE
Clinique de la Mongala	Quartiers résidentiels	2015-03-09	Quartiers excentriques et d'extension	39		Patiente venue d'elle même			2014-03-25										FALSE	FALSE	FALSE	FALSE	FALSE	FALSE	FALSE	FALSE	TRUE	FALSE	FALSE	FALSE	306	1	Autres diagnostics	2014-03-25	Traitement médico-chirurgical	FALSE	FALSE	TRUE	FALSE	FALSE	FALSE	FALSE	FALSE	FALSE	FALSE	FALSE	TRUE	FALSE	FALSE
Clinique de la Mongala	Quartiers résidentiels	2015-03-09	Quartiers des anciennes cités	31		Patiente venue d'elle même			2014-03-24										FALSE	FALSE	FALSE	FALSE	FALSE	FALSE	FALSE	FALSE	FALSE	FALSE	FALSE	FALSE	307	1	Autres diagnostics	2014-03-24	Traitement médico-chirurgical	FALSE	FALSE	TRUE	FALSE	FALSE	FALSE	FALSE	FALSE	FALSE	FALSE	FALSE	FALSE	FALSE	FALSE
Clinique de la Mongala	Quartiers résidentiels	2015-03-09	Quartiers résidentiels	29		Patiente venue d'elle même			2014-03-04										FALSE	FALSE	FALSE	FALSE	FALSE	FALSE	FALSE	FALSE	FALSE	FALSE	FALSE	FALSE	308	1	Autres diagnostics	2014-03-04	Traitement médico-chirurgical	FALSE	FALSE	TRUE	FALSE	FALSE	FALSE	FALSE	FALSE	FALSE	FALSE	FALSE	TRUE	FALSE	FALSE
Clinique de la Mongala	Quartiers résidentiels	2015-03-09	Quartiers des anciennes cités	26		Patiente venue d'elle même			2014-03-06										FALSE	FALSE	FALSE	TRUE	FALSE	FALSE	FALSE	FALSE	FALSE	TRUE	FALSE	FALSE	309	1	Autres diagnostics	2014-03-06	Traitement médico-chirurgical	FALSE	FALSE	TRUE	FALSE	FALSE	FALSE	FALSE	FALSE	FALSE	FALSE	FALSE	TRUE	FALSE	FALSE
Clinique de la Mongala	Quartiers résidentiels	2015-03-09	Quartiers des anciennes cités	31		Patiente venue d'elle même			2014-03-03										FALSE	FALSE	FALSE	TRUE	FALSE	FALSE	FALSE	FALSE	FALSE	FALSE	FALSE	FALSE	310	1	Autres diagnostics	2014-03-03	Traitement médico-chirurgical	FALSE	FALSE	TRUE	FALSE	FALSE	FALSE	FALSE	FALSE	FALSE	FALSE	FALSE	TRUE	FALSE	FALSE
Clinique de la Mongala	Quartiers résidentiels	2015-03-09	Quartiers des anciennes cités	26		Patiente venue d'elle même			2014-02-28										FALSE	FALSE	FALSE	FALSE	FALSE	FALSE	FALSE	FALSE	FALSE	FALSE	FALSE	TRUE	311	1	Autres diagnostics		Traitement médico-chirurgical	FALSE	FALSE	TRUE	FALSE	FALSE	FALSE	FALSE	FALSE	FALSE	FALSE	FALSE	TRUE	FALSE	FALSE
Clinique de la Mongala	Quartiers résidentiels	2015-03-09	Quartiers des cités planifiées	48		Patiente venue d'elle même			2014-02-23			140		80					FALSE	FALSE	FALSE	FALSE	FALSE	FALSE	FALSE	FALSE	TRUE	FALSE	FALSE	FALSE	312	1	Autres diagnostics	2014-02-23		FALSE	FALSE	FALSE	FALSE	FALSE	FALSE	FALSE	TRUE	FALSE	TRUE	FALSE	FALSE	FALSE	FALSE
Clinique de la Mongala	Quartiers résidentiels	2015-03-09	Quartiers des cités planifiées	32	Mariée	Patiente venue d'elle même			2014-02-02			120	1	70	0		0		FALSE	FALSE	FALSE	FALSE	FALSE	FALSE	FALSE	FALSE	FALSE	TRUE	FALSE	FALSE	313	1	Autres diagnostics		Traitement médico-chirurgical	FALSE	FALSE	TRUE	FALSE	FALSE	FALSE	FALSE	FALSE	FALSE	TRUE	FALSE	TRUE	FALSE	FALSE
Clinique de la Mongala	Quartiers résidentiels	2015-03-09	Quartiers excentriques et d'extension	30		Patiente venue d'elle même			2014-02-13			100		60					FALSE	FALSE	FALSE	FALSE	FALSE	FALSE	FALSE	FALSE	TRUE	FALSE	FALSE	FALSE	314	1	Autres diagnostics	2014-02-13	Traitement médico-chirurgical	FALSE	FALSE	TRUE	FALSE	FALSE	FALSE	FALSE	FALSE	FALSE	TRUE	FALSE	TRUE	FALSE	FALSE
Clinique de la Mongala	Quartiers résidentiels	2015-03-09	Quartiers semi-ruraux	31		Patiente venue d'elle même			2014-02-10			100		60					FALSE	FALSE	FALSE	FALSE	FALSE	FALSE	FALSE	FALSE	TRUE	FALSE	FALSE	FALSE	315	1	Autres diagnostics	2014-02-10	Traitement médico-chirurgical	FALSE	FALSE	TRUE	TRUE	FALSE	FALSE	FALSE	FALSE	FALSE	FALSE	FALSE	TRUE	FALSE	FALSE
Clinique de la Mongala	Quartiers résidentiels	2015-03-09	Quartiers des anciennes cités	27	Mariée	Patiente venue d'elle même			2014-02-28			90		60					FALSE	FALSE	FALSE	TRUE	FALSE	FALSE	FALSE	FALSE	FALSE	FALSE	FALSE	FALSE	316	1	Autres diagnostics	2014-02-28	Traitement médico-chirurgical	FALSE	FALSE	TRUE	FALSE	FALSE	FALSE	TRUE	FALSE	FALSE	FALSE	FALSE	TRUE	FALSE	FALSE
Clinique de la Mongala	Quartiers résidentiels	2015-03-09	Quartiers résidentiels	38	Mariée	Patiente venue d'elle même			2014-02-05			100	8	60	7		1		FALSE	FALSE	FALSE	FALSE	FALSE	FALSE	FALSE	FALSE	FALSE	FALSE	FALSE	TRUE	317	1	Autres diagnostics	2014-02-05	Traitement médico-chirurgical	FALSE	FALSE	FALSE	FALSE	FALSE	FALSE	FALSE	FALSE	FALSE	FALSE	FALSE	FALSE	FALSE	FALSE
Clinique de la Mongala	Quartiers résidentiels	2015-03-09		42		Patiente venue d'elle même			2014-01-14			90	3	60	3	32	0		FALSE	FALSE	FALSE	FALSE	FALSE	FALSE	FALSE	FALSE	FALSE	FALSE	FALSE	FALSE	318	1	Autres diagnostics		Traitement médico-chirurgical	FALSE	FALSE	TRUE	FALSE	FALSE	FALSE	FALSE	FALSE	FALSE	TRUE	FALSE	FALSE	FALSE	FALSE
Clinique de la Mongala	Quartiers résidentiels	2015-03-09	Quartiers semi-ruraux	30		Patiente venue d'elle même			2014-01-21			80	3	60	2		0		FALSE	FALSE	FALSE	FALSE	FALSE	FALSE	FALSE	FALSE	TRUE	FALSE	FALSE	FALSE	319	1	Autres diagnostics	2014-01-21	Traitement médico-chirurgical	FALSE	FALSE	FALSE	FALSE	FALSE	FALSE	FALSE	FALSE	FALSE	TRUE	FALSE	FALSE	FALSE	FALSE
Clinique de la Mongala	Quartiers résidentiels	2015-03-09	Quartiers des cités planifiées	36		Patiente venue d'elle même			2014-01-08			90		60					FALSE	FALSE	FALSE	FALSE	FALSE	FALSE	FALSE	FALSE	FALSE	FALSE	FALSE	FALSE	320	1	Autres diagnostics	2014-01-08	Traitement médico-chirurgical	FALSE	FALSE	FALSE	TRUE	FALSE	FALSE	FALSE	FALSE	FALSE	TRUE	FALSE	FALSE	FALSE	FALSE
Clinique de la Mongala	Quartiers résidentiels	2015-03-09	Quartiers des anciennes cités	42		Patiente venue d'elle même			2014-01-13				3		3		0		FALSE	FALSE	FALSE	FALSE	FALSE	FALSE	FALSE	FALSE	FALSE	FALSE	FALSE	FALSE	321	1	Autres diagnostics	2014-01-13	Traitement médico-chirurgical	FALSE	FALSE	TRUE	FALSE	FALSE	FALSE	FALSE	FALSE	FALSE	FALSE	FALSE	TRUE	FALSE	FALSE
Clinique de la Mongala	Quartiers résidentiels	2015-03-09	Quartiers résidentiels	27		Patiente venue d'elle même			2014-01-10										FALSE	FALSE	FALSE	FALSE	FALSE	FALSE	FALSE	FALSE	FALSE	FALSE	FALSE	FALSE	322	1	Autres diagnostics	2014-01-10	Traitement médico-chirurgical	FALSE	FALSE	TRUE	FALSE	FALSE	FALSE	FALSE	FALSE	FALSE	TRUE	FALSE	FALSE	FALSE	FALSE
Clinique de la Mongala	Quartiers résidentiels	2015-03-09	Quartiers résidentiels	29		Patiente venue d'elle même			2014-09-21										FALSE	FALSE	FALSE	FALSE	FALSE	FALSE	FALSE	FALSE	TRUE	FALSE	FALSE	FALSE	323	1	Autres diagnostics	2014-09-21	Traitement médico-chirurgical	FALSE	FALSE	TRUE	FALSE	FALSE	FALSE	FALSE	FALSE	TRUE	FALSE	FALSE	TRUE	FALSE	FALSE
Clinique de la Mongala	Quartiers résidentiels	2015-03-09	Quartiers semi-ruraux	32		Patiente venue d'elle même			2014-09-16										FALSE	FALSE	FALSE	FALSE	FALSE	FALSE	FALSE	FALSE	FALSE	FALSE	FALSE	FALSE	324	1	Autres diagnostics	2014-09-16	Traitement médico-chirurgical	FALSE	FALSE	TRUE	FALSE	FALSE	FALSE	FALSE	FALSE	FALSE	FALSE	FALSE	TRUE	FALSE	FALSE
Clinique de la Mongala	Quartiers résidentiels	2015-03-09	Quartiers excentriques et d'extension	27		Patiente venue d'elle même			2014-09-10										FALSE	FALSE	FALSE	FALSE	FALSE	FALSE	FALSE	FALSE	FALSE	FALSE	FALSE	FALSE	325	1	Autres diagnostics	2014-09-10	Traitement médico-chirurgical	FALSE	FALSE	TRUE	FALSE	FALSE	FALSE	FALSE	FALSE	FALSE	TRUE	FALSE	TRUE	FALSE	FALSE
Clinique de la Mongala	Quartiers résidentiels	2015-03-10	Quartiers semi-ruraux	47		Patiente venue d'elle même			2014-02-23										FALSE	FALSE	FALSE	FALSE	FALSE	FALSE	FALSE	FALSE	FALSE	FALSE	FALSE	FALSE	326	1	Autres diagnostics	2014-02-23	Traitement médico-chirurgical	FALSE	FALSE	TRUE	FALSE	FALSE	FALSE	FALSE	FALSE	FALSE	FALSE	FALSE	TRUE	FALSE	FALSE
Clinique de la Mongala	Quartiers résidentiels	2015-03-06	Quartiers des cités planifiées	34		Patiente venue d'elle même			2014-03-17										FALSE	FALSE	FALSE	FALSE	FALSE	FALSE	FALSE	FALSE	FALSE	FALSE	FALSE	TRUE	327	1	Autres diagnostics	2014-03-17	Traitement médico-chirurgical	FALSE	FALSE	TRUE	FALSE	FALSE	FALSE	FALSE	FALSE	FALSE	FALSE	FALSE	TRUE	FALSE	FALSE
Clinique de la Mongala	Quartiers résidentiels	2015-03-10	Quartiers des cités planifiées	19		Patiente venue d'elle même			2014-03-26										FALSE	FALSE	FALSE	FALSE	FALSE	FALSE	FALSE	FALSE	FALSE	FALSE	FALSE	TRUE	328	1	Autres diagnostics	2014-03-26	Traitement médico-chirurgical	FALSE	FALSE	TRUE	FALSE	FALSE	FALSE	FALSE	FALSE	FALSE	FALSE	FALSE	TRUE	FALSE	FALSE
Clinique de la Mongala	Quartiers résidentiels	2015-03-10	Quartiers excentriques et d'extension	48		Patiente venue d'elle même			2014-06-01										FALSE	FALSE	FALSE	FALSE	FALSE	FALSE	FALSE	FALSE	FALSE	FALSE	TRUE	FALSE	329	1	Autres diagnostics	2014-06-01	Traitement médico-chirurgical	FALSE	FALSE	TRUE	FALSE	FALSE	FALSE	FALSE	FALSE	FALSE	TRUE	FALSE	TRUE	FALSE	FALSE
Clinique de la Mongala	Quartiers résidentiels	2015-03-10	Quartiers résidentiels	41		Patiente venue d'elle même			2014-06-09										FALSE	FALSE	FALSE	FALSE	FALSE	FALSE	FALSE	FALSE	FALSE	FALSE	FALSE	TRUE	330	1	Autres diagnostics	2014-06-09	Traitement médico-chirurgical	FALSE	FALSE	TRUE	FALSE	FALSE	FALSE	FALSE	FALSE	FALSE	FALSE	FALSE	TRUE	FALSE	FALSE
Clinique de la Mongala	Quartiers résidentiels	2015-03-10	Quartiers résidentiels	45		Patiente venue d'elle même			2014-06-08										FALSE	FALSE	FALSE	FALSE	FALSE	FALSE	FALSE	FALSE	FALSE	FALSE	TRUE	FALSE	331	1	Autres diagnostics	2014-06-08	Traitement médico-chirurgical	FALSE	FALSE	TRUE	FALSE	FALSE	FALSE	FALSE	FALSE	FALSE	FALSE	FALSE	TRUE	FALSE	FALSE
Clinique de la Mongala	Quartiers résidentiels	2015-03-10		39		Patiente venue d'elle même			2014-07-03										FALSE	FALSE	FALSE	FALSE	FALSE	FALSE	FALSE	FALSE	FALSE	FALSE	TRUE	FALSE	332	1	Autres diagnostics	2014-07-03	Traitement médico-chirurgical	FALSE	FALSE	TRUE	FALSE	FALSE	FALSE	FALSE	FALSE	FALSE	FALSE	FALSE	TRUE	FALSE	FALSE
Clinique de la Mongala	Quartiers résidentiels	2015-03-10	Quartiers semi-ruraux	40		Patiente venue d'elle même			2014-08-19										FALSE	FALSE	FALSE	FALSE	FALSE	FALSE	FALSE	FALSE	FALSE	FALSE	FALSE	TRUE	333	1	Autres diagnostics	2014-08-19	Traitement médico-chirurgical	FALSE	FALSE	TRUE	FALSE	FALSE	FALSE	FALSE	FALSE	FALSE	FALSE	FALSE	TRUE	FALSE	FALSE
Clinique de la Mongala	Quartiers résidentiels	2015-03-10	Quartiers semi-ruraux	37		Patiente venue d'elle même			2014-08-25										FALSE	FALSE	FALSE	FALSE	FALSE	FALSE	FALSE	FALSE	FALSE	FALSE	FALSE	FALSE	334	1	Autres diagnostics	2014-08-25	Traitement médico-chirurgical	FALSE	FALSE	TRUE	FALSE	FALSE	FALSE	FALSE	FALSE	FALSE	TRUE	FALSE	TRUE	FALSE	FALSE
Clinique de la Mongala	Quartiers résidentiels	2015-03-10	Quartiers semi-ruraux	28		Patiente venue d'elle même			2014-08-28										FALSE	FALSE	FALSE	FALSE	FALSE	FALSE	FALSE	FALSE	FALSE	FALSE	TRUE	FALSE	335	1	Autres diagnostics	2014-08-28	Traitement médico-chirurgical	FALSE	FALSE	TRUE	FALSE	FALSE	FALSE	FALSE	FALSE	TRUE	FALSE	FALSE	TRUE	FALSE	FALSE
Clinique de la Mongala	Quartiers résidentiels	2015-03-10	Quartiers excentriques et d'extension	38		Patiente venue d'elle même			2014-09-21										FALSE	FALSE	FALSE	FALSE	FALSE	FALSE	FALSE	FALSE	FALSE	FALSE	FALSE	TRUE	336	1	Autres diagnostics	2014-09-21	Traitement médico-chirurgical	FALSE	FALSE	TRUE	FALSE	FALSE	FALSE	FALSE	FALSE	TRUE	FALSE	FALSE	TRUE	FALSE	FALSE
Clinique de la Mongala	Quartiers résidentiels	2015-03-10	Quartiers des cités planifiées	30		Patiente venue d'elle même			2014-11-26										FALSE	FALSE	FALSE	FALSE	FALSE	FALSE	FALSE	FALSE	FALSE	FALSE	TRUE	FALSE	337	1	Autres diagnostics	2014-11-26	Traitement médico-chirurgical	FALSE	FALSE	TRUE	FALSE	FALSE	FALSE	FALSE	FALSE	FALSE	FALSE	FALSE	TRUE	FALSE	FALSE
Clinique de la Mongala	Quartiers résidentiels	2015-03-10	Quartiers excentriques et d'extension	44		Patiente venue d'elle même			2014-12-26										FALSE	FALSE	FALSE	FALSE	FALSE	FALSE	FALSE	FALSE	FALSE	FALSE	FALSE	TRUE	338	1	Autres diagnostics	2014-12-26	Traitement médico-chirurgical	FALSE	FALSE	TRUE	FALSE	FALSE	FALSE	FALSE	FALSE	FALSE	FALSE	FALSE	TRUE	FALSE	FALSE
Clinique de la Mongala	Quartiers résidentiels	2015-03-10	Quartiers des cités planifiées	26		Patiente venue d'elle même			2014-12-14										FALSE	FALSE	FALSE	FALSE	FALSE	FALSE	FALSE	FALSE	TRUE	FALSE	FALSE	FALSE	339	1	Autres diagnostics	2014-12-14	Traitement médico-chirurgical	FALSE	FALSE	TRUE	FALSE	FALSE	FALSE	FALSE	FALSE	FALSE	FALSE	FALSE	TRUE	FALSE	FALSE
Clinique de la Mongala	Quartiers résidentiels	2015-03-10	Quartiers des cités planifiées	28		Patiente venue d'elle même			2014-12-24										FALSE	FALSE	FALSE	FALSE	FALSE	FALSE	FALSE	FALSE	TRUE	FALSE	FALSE	FALSE	340	1	Autres diagnostics	2014-12-24	Traitement médico-chirurgical	FALSE	FALSE	TRUE	FALSE	FALSE	FALSE	FALSE	FALSE	FALSE	FALSE	FALSE	TRUE	FALSE	FALSE
Clinique de la Mongala	Quartiers résidentiels	2015-03-10	Quartiers résidentiels	39		Patiente venue d'elle même			2014-12-24										FALSE	FALSE	FALSE	TRUE	FALSE	FALSE	FALSE	FALSE	FALSE	FALSE	FALSE	FALSE	341	1	Autres diagnostics	2014-12-24	Traitement médico-chirurgical	FALSE	FALSE	TRUE	FALSE	FALSE	FALSE	FALSE	FALSE	FALSE	FALSE	FALSE	TRUE	FALSE	FALSE
Clinique de la Mongala	Quartiers résidentiels	2015-03-10	Quartiers semi-ruraux	27		Patiente venue d'elle même			2014-12-29										FALSE	FALSE	FALSE	FALSE	FALSE	FALSE	FALSE	FALSE	TRUE	FALSE	FALSE	FALSE	342	1	Autres diagnostics	2014-12-29	Traitement médico-chirurgical	FALSE	FALSE	TRUE	FALSE	FALSE	FALSE	FALSE	FALSE	FALSE	FALSE	FALSE	TRUE	FALSE	FALSE
Clinique de la Mongala	Quartiers résidentiels	2015-03-10	Quartiers des cités planifiées	32		Patiente venue d'elle même			2014-12-30										FALSE	FALSE	FALSE	FALSE	FALSE	FALSE	FALSE	FALSE	TRUE	FALSE	FALSE	FALSE	343	1	Autres diagnostics	2014-12-30	Traitement médico-chirurgical	FALSE	FALSE	TRUE	FALSE	FALSE	FALSE	FALSE	FALSE	FALSE	FALSE	FALSE	TRUE	FALSE	FALSE
Clinique de la Mongala	Quartiers résidentiels	2015-03-10	Quartiers des anciennes cités	32		Patiente venue d'elle même			2014-12-30										FALSE	FALSE	FALSE	FALSE	FALSE	FALSE	FALSE	FALSE	FALSE	FALSE	FALSE	FALSE	344	1	Autres diagnostics	2014-12-30	Traitement médico-chirurgical	FALSE	FALSE	TRUE	FALSE	FALSE	FALSE	FALSE	FALSE	FALSE	FALSE	FALSE	TRUE	FALSE	FALSE
Clinique de la Mongala	Quartiers résidentiels	2015-03-10	Quartiers des cités planifiées	25		Patiente venue d'elle même			2014-11-07										FALSE	FALSE	FALSE	FALSE	FALSE	FALSE	FALSE	FALSE	TRUE	FALSE	TRUE	FALSE	345	1	Autres diagnostics	2014-11-07	Traitement médico-chirurgical	FALSE	FALSE	TRUE	FALSE	FALSE	FALSE	FALSE	FALSE	FALSE	FALSE	FALSE	TRUE	FALSE	FALSE
Clinique de la Mongala	Quartiers résidentiels	2015-03-10	Quartiers excentriques et d'extension	29		Patiente venue d'elle même			2014-11-10										FALSE	FALSE	FALSE	FALSE	FALSE	FALSE	FALSE	FALSE	FALSE	FALSE	FALSE	FALSE	346	1	Autres diagnostics	2014-11-10	Traitement médico-chirurgical	FALSE	FALSE	TRUE	FALSE	FALSE	FALSE	FALSE	FALSE	FALSE	FALSE	FALSE	TRUE	TRUE	FALSE
Clinique de la Mongala	Quartiers résidentiels	2015-03-10	Quartiers excentriques et d'extension	27		Patiente venue d'elle même			2014-11-10										FALSE	FALSE	FALSE	FALSE	FALSE	FALSE	FALSE	FALSE	FALSE	TRUE	FALSE	FALSE	347	1	Autres diagnostics		Traitement médico-chirurgical	FALSE	FALSE	TRUE	FALSE	FALSE	FALSE	FALSE	FALSE	FALSE	FALSE	FALSE	TRUE	FALSE	FALSE
Clinique de la Mongala	Quartiers résidentiels	2015-03-10	Quartiers des anciennes cités	37		Patiente venue d'elle même			2014-11-14										FALSE	FALSE	FALSE	FALSE	FALSE	FALSE	FALSE	FALSE	FALSE	FALSE	FALSE	TRUE	348	1	Autres diagnostics	2014-11-14	Traitement médico-chirurgical	FALSE	FALSE	TRUE	FALSE	FALSE	FALSE	FALSE	FALSE	FALSE	FALSE	FALSE	TRUE	FALSE	FALSE
Clinique de la Mongala	Quartiers résidentiels	2015-03-10	Quartiers excentriques et d'extension	41		Patiente venue d'elle même			2014-11-25										FALSE	FALSE	FALSE	FALSE	FALSE	FALSE	FALSE	FALSE	TRUE	FALSE	FALSE	FALSE	349	1	Autres diagnostics	2014-11-25	Traitement médico-chirurgical	FALSE	FALSE	TRUE	FALSE	FALSE	FALSE	FALSE	FALSE	FALSE	FALSE	FALSE	TRUE	FALSE	FALSE
Clinique de la Mongala	Quartiers résidentiels	2015-03-10	Quartiers des anciennes cités	26		Patiente venue d'elle même			2014-10-01										FALSE	FALSE	FALSE	FALSE	FALSE	FALSE	FALSE	FALSE	TRUE	TRUE	FALSE	FALSE	350	1	Autres diagnostics	2014-10-01	Traitement médico-chirurgical	FALSE	FALSE	TRUE	FALSE	FALSE	FALSE	FALSE	FALSE	FALSE	FALSE	FALSE	TRUE	FALSE	FALSE
Clinique de la Mongala	Quartiers résidentiels	2015-03-10	Quartiers résidentiels	29		Patiente venue d'elle même			2014-10-01										FALSE	FALSE	FALSE	TRUE	FALSE	FALSE	FALSE	FALSE	FALSE	FALSE	FALSE	FALSE	351	1	Autres diagnostics	2014-10-01	Traitement médico-chirurgical	TRUE	FALSE	FALSE	FALSE	FALSE	FALSE	FALSE	FALSE	FALSE	FALSE	FALSE	TRUE	FALSE	FALSE
Clinique de la Mongala	Quartiers résidentiels	2015-03-10	Quartiers des anciennes cités	27		Patiente venue d'elle même			2014-10-06										FALSE	FALSE	FALSE	FALSE	FALSE	FALSE	FALSE	FALSE	TRUE	FALSE	FALSE	FALSE	352	1	Autres diagnostics	2014-10-06	Traitement médico-chirurgical	TRUE	FALSE	FALSE	FALSE	FALSE	FALSE	FALSE	FALSE	FALSE	FALSE	FALSE	TRUE	FALSE	FALSE
Clinique de la Mongala	Quartiers résidentiels	2015-03-10	Quartiers résidentiels	26		Patiente venue d'elle même			2014-10-07										FALSE	FALSE	FALSE	FALSE	FALSE	FALSE	FALSE	FALSE	TRUE	FALSE	FALSE	FALSE	353	1	Autres diagnostics	2014-10-07	Traitement médico-chirurgical	FALSE	FALSE	TRUE	FALSE	FALSE	FALSE	FALSE	FALSE	FALSE	FALSE	FALSE	TRUE	FALSE	FALSE
Clinique de la Mongala	Quartiers résidentiels	2015-03-10	Quartiers des anciennes cités	29		Patiente venue d'elle même			2014-10-08										FALSE	FALSE	FALSE	FALSE	FALSE	FALSE	FALSE	FALSE	TRUE	FALSE	FALSE	FALSE	354	1	Autres diagnostics	2014-10-08	Traitement médico-chirurgical	FALSE	FALSE	TRUE	FALSE	FALSE	FALSE	FALSE	FALSE	FALSE	FALSE	FALSE	TRUE	FALSE	FALSE
Clinique de la Mongala	Quartiers résidentiels	2015-03-10	Quartiers des cités planifiées	32		Patiente venue d'elle même			2014-10-15										FALSE	FALSE	FALSE	FALSE	FALSE	FALSE	FALSE	FALSE	TRUE	FALSE	FALSE	FALSE	355	1	Autres diagnostics	2014-10-15	Traitement médico-chirurgical	FALSE	FALSE	FALSE	FALSE	FALSE	FALSE	FALSE	FALSE	FALSE	FALSE	FALSE	FALSE	FALSE	FALSE
Clinique de la Mongala	Quartiers résidentiels	2015-03-10	Quartiers résidentiels	31		Patiente venue d'elle même			2014-10-15										FALSE	FALSE	FALSE	FALSE	FALSE	FALSE	FALSE	FALSE	FALSE	FALSE	FALSE	FALSE	356	1	Autres diagnostics	2014-10-15	Traitement médico-chirurgical	FALSE	FALSE	TRUE	FALSE	FALSE	FALSE	FALSE	FALSE	FALSE	FALSE	FALSE	TRUE	FALSE	FALSE
Clinique de la Mongala	Quartiers résidentiels	2015-03-10	Quartiers résidentiels	30		Patiente venue d'elle même			2014-06-21										FALSE	FALSE	FALSE	FALSE	FALSE	FALSE	FALSE	FALSE	FALSE	FALSE	FALSE	FALSE	357	1	Autres diagnostics	2014-06-21	Traitement médico-chirurgical	FALSE	FALSE	TRUE	FALSE	FALSE	FALSE	FALSE	FALSE	FALSE	TRUE	FALSE	TRUE	FALSE	FALSE
Clinique de la Mongala	Quartiers résidentiels	2015-03-10	Quartiers des anciennes cités	29		Patiente venue d'elle même			2014-10-24										FALSE	FALSE	FALSE	FALSE	FALSE	FALSE	FALSE	FALSE	FALSE	FALSE	FALSE	FALSE	358	1	Autres diagnostics	2014-10-24	Traitement médico-chirurgical	FALSE	FALSE	TRUE	FALSE	FALSE	FALSE	FALSE	FALSE	FALSE	FALSE	FALSE	TRUE	TRUE	FALSE
Clinique de la Mongala	Quartiers résidentiels	2015-03-10	Quartiers semi-ruraux	27		Patiente venue d'elle même			2014-10-29										FALSE	FALSE	FALSE	FALSE	FALSE	FALSE	FALSE	FALSE	TRUE	FALSE	FALSE	FALSE	359	1	Autres diagnostics	2014-10-29	Traitement médico-chirurgical	FALSE	FALSE	TRUE	FALSE	FALSE	FALSE	FALSE	FALSE	FALSE	FALSE	FALSE	TRUE	FALSE	FALSE
Maternité de Kintambo	Quartiers des anciennes cités	2015-02-16	Quartiers des anciennes cités	26		Patiente venue d'elle même			2014-02-06				2		0		1		FALSE	FALSE	FALSE	FALSE	FALSE	FALSE	FALSE	FALSE	TRUE	FALSE	FALSE	FALSE	360	1	Autres diagnostics	2014-02-07	Traitement médico-chirurgical	FALSE	FALSE	TRUE	FALSE	FALSE	FALSE	TRUE	FALSE	TRUE	FALSE	FALSE	TRUE	FALSE	FALSE
Maternité de Kintambo	Quartiers des anciennes cités	2015-02-16	Quartiers résidentiels	32		Patiente venue d'elle même			2014-01-27		36.1	100	3	50	2		0		FALSE	FALSE	FALSE	TRUE	FALSE	FALSE	FALSE	FALSE	FALSE	FALSE	FALSE	FALSE	361	1	Autres diagnostics	2014-01-27	Traitement médico-chirurgical	FALSE	FALSE	TRUE	FALSE	FALSE	FALSE	TRUE	FALSE	TRUE	FALSE	FALSE	FALSE	FALSE	FALSE
Maternité de Kintambo	Quartiers des anciennes cités	2015-02-16	Quartiers résidentiels	36		Patiente venue d'elle même			2014-01-21			110	5	70	2		2		FALSE	FALSE	FALSE	FALSE	FALSE	FALSE	FALSE	FALSE	FALSE	FALSE	FALSE	FALSE	362	1	Autres diagnostics	2014-01-27	Traitement médico-chirurgical	FALSE	FALSE	TRUE	FALSE	FALSE	FALSE	TRUE	FALSE	TRUE	FALSE	FALSE	FALSE	FALSE	FALSE
Maternité de Kintambo	Quartiers des anciennes cités	2015-02-16	Quartiers des anciennes cités	19		Patiente venue d'elle même			2014-01-24				2		1		0		FALSE	FALSE	FALSE	FALSE	FALSE	FALSE	FALSE	FALSE	FALSE	FALSE	FALSE	FALSE	363	1	Autres diagnostics	2014-01-24	Traitement médico-chirurgical	FALSE	FALSE	TRUE	FALSE	FALSE	FALSE	TRUE	FALSE	TRUE	FALSE	FALSE	FALSE	FALSE	FALSE
Maternité de Kintambo	Quartiers des anciennes cités	2015-02-16	Quartiers des cités planifiées	32		Patiente venue d'elle même			2014-02-07				2		0		1		FALSE	FALSE	FALSE	FALSE	FALSE	FALSE	FALSE	FALSE	FALSE	FALSE	TRUE	FALSE	364	1	Autres diagnostics	2014-02-27	Traitement médico-chirurgical	TRUE	FALSE	FALSE	FALSE	FALSE	FALSE	FALSE	FALSE	FALSE	TRUE	FALSE	FALSE	FALSE	FALSE
Maternité de Kintambo	Quartiers des anciennes cités	2015-02-16	Quartiers résidentiels	36		Patiente référée	Quartiers résidentiels		2014-01-30	2014-01-30 16:00:00			3		2		0		FALSE	FALSE	FALSE	FALSE	FALSE	FALSE	FALSE	FALSE	FALSE	FALSE	FALSE	FALSE	365	1	Autres diagnostics	2014-01-30	Traitement médico-chirurgical	FALSE	FALSE	TRUE	FALSE	FALSE	FALSE	TRUE	FALSE	TRUE	FALSE	FALSE	TRUE	FALSE	FALSE
Maternité de Kintambo	Quartiers des anciennes cités	2015-02-16	Quartiers résidentiels	37		Patiente venue d'elle même			2014-02-17	2014-02-17 07:35:00			7		5		2		TRUE	FALSE	FALSE	FALSE	FALSE	FALSE	FALSE	FALSE	FALSE	FALSE	FALSE	FALSE	366	1	Complication d'avortement provoqué	2014-02-17	Traitement médico-chirurgical	FALSE	FALSE	TRUE	TRUE	FALSE	FALSE	TRUE	FALSE	TRUE	FALSE	FALSE	FALSE	FALSE	FALSE
Maternité de Kintambo	Quartiers des anciennes cités	2015-02-16	Quartiers excentriques et d'extension	32	Mariée	Patiente venue d'elle même			2014-02-06			90	5	60	4		0		FALSE	FALSE	FALSE	TRUE	FALSE	FALSE	FALSE	FALSE	FALSE	FALSE	FALSE	FALSE	367	1	Autres diagnostics	2014-02-06	Traitement médico-chirurgical	FALSE	FALSE	TRUE	FALSE	FALSE	FALSE	TRUE	FALSE	TRUE	TRUE	FALSE	TRUE	FALSE	FALSE
Maternité de Kintambo	Quartiers des anciennes cités	2015-02-16	Quartiers résidentiels	32		Patiente venue d'elle même			2014-01-27		35.8	120	2	60	2		0		FALSE	FALSE	FALSE	FALSE	FALSE	FALSE	TRUE	FALSE	FALSE	FALSE	FALSE	FALSE	368	1	Autres diagnostics	2014-01-27	Traitement médico-chirurgical	FALSE	FALSE	TRUE	FALSE	FALSE	FALSE	TRUE	FALSE	FALSE	FALSE	FALSE	TRUE	FALSE	FALSE
Maternité de Kintambo	Quartiers des anciennes cités	2015-02-16	Quartiers résidentiels	24		Patiente venue d'elle même			2014-02-03		36	120	1	80	0		0		FALSE	FALSE	FALSE	FALSE	FALSE	FALSE	FALSE	FALSE	FALSE	FALSE	FALSE	FALSE	369	1	Autres diagnostics	2014-02-03	Traitement médico-chirurgical	FALSE	FALSE	TRUE	FALSE	FALSE	FALSE	TRUE	FALSE	TRUE	FALSE	FALSE	FALSE	FALSE	FALSE
Maternité de Kintambo	Quartiers des anciennes cités	2015-02-16	Quartiers des anciennes cités	28	Mariée	Patiente venue d'elle même			2014-01-27				2		1		0		FALSE	FALSE	FALSE	TRUE	FALSE	FALSE	FALSE	FALSE	FALSE	FALSE	FALSE	FALSE	370	1	Autres diagnostics	2014-01-25	Traitement médico-chirurgical	FALSE	FALSE	TRUE	FALSE	FALSE	FALSE	TRUE	FALSE	TRUE	FALSE	FALSE	FALSE	FALSE	FALSE
Maternité de Kintambo	Quartiers des anciennes cités	2015-02-16	Quartiers des cités planifiées	22		Patiente référée	Quartiers des anciennes cités		2014-01-11	2014-01-11 09:00:00		130	2	70	1		0		FALSE	FALSE	FALSE	TRUE	FALSE	FALSE	FALSE	FALSE	FALSE	FALSE	FALSE	FALSE	371	1	Autres diagnostics	2014-01-11	Traitement médico-chirurgical	FALSE	FALSE	TRUE	FALSE	FALSE	FALSE	TRUE	FALSE	TRUE	FALSE	FALSE	FALSE	FALSE	FALSE
Maternité de Kintambo	Quartiers des anciennes cités	2015-02-16	Quartiers excentriques et d'extension	36		Patiente venue d'elle même			2014-02-06			120	2	80	0		1		FALSE	FALSE	FALSE	FALSE	FALSE	FALSE	FALSE	FALSE	FALSE	FALSE	FALSE	FALSE	372	1	Autres diagnostics	2014-02-06	Traitement médico-chirurgical	TRUE	FALSE	FALSE	FALSE	FALSE	FALSE	TRUE	FALSE	FALSE	FALSE	FALSE	TRUE	FALSE	FALSE
Maternité de Kintambo	Quartiers des anciennes cités	2015-02-13	Quartiers des anciennes cités	25	Mariée	Patiente venue d'elle même			2014-07-07	2014-07-07 09:35:00	36.4	100	4	70	1		2		FALSE	FALSE	FALSE	TRUE	FALSE	FALSE	FALSE	FALSE	FALSE	FALSE	FALSE	FALSE	373	1	Autres diagnostics	2014-07-07	Traitement médico-chirurgical	FALSE	FALSE	TRUE	FALSE	FALSE	FALSE	TRUE	FALSE	FALSE	FALSE	FALSE	TRUE	FALSE	FALSE
Maternité de Kintambo	Quartiers des anciennes cités	2015-02-13	Quartiers des cités planifiées	36		Patiente venue d'elle même			2014-08-03			90	2	60	2	24	0	72	FALSE	FALSE	FALSE	TRUE	FALSE	FALSE	FALSE	FALSE	FALSE	FALSE	FALSE	FALSE	374	1	Autres diagnostics	2014-08-03	Traitement médico-chirurgical	FALSE	FALSE	TRUE	FALSE	FALSE	FALSE	TRUE	FALSE	TRUE	FALSE	FALSE	TRUE	FALSE	FALSE
Maternité de Kintambo	Quartiers des anciennes cités	2015-02-13	Quartiers résidentiels	25		Patiente référée	Quartiers résidentiels	2014-07-29	2014-07-29		36	120	1	70	0		0		FALSE	FALSE	FALSE	FALSE	FALSE	FALSE	FALSE	FALSE	FALSE	FALSE	FALSE	FALSE	375	1	Autres diagnostics	2014-07-29	Traitement médico-chirurgical	FALSE	FALSE	TRUE	FALSE	FALSE	FALSE	TRUE	FALSE	TRUE	FALSE	FALSE	TRUE	FALSE	FALSE
Maternité de Kintambo	Quartiers des anciennes cités	2015-02-13	Quartiers semi-ruraux	24		Patiente venue d'elle même			2014-07-28			120	1	80	0		0		FALSE	FALSE	FALSE	FALSE	FALSE	FALSE	FALSE	FALSE	TRUE	FALSE	FALSE	FALSE	376	1	Autres diagnostics	2014-07-28	Traitement médico-chirurgical	FALSE	FALSE	TRUE	FALSE	FALSE	FALSE	TRUE	FALSE	TRUE	FALSE	FALSE	FALSE	FALSE	FALSE
Maternité de Kintambo	Quartiers des anciennes cités	2015-02-13	Quartiers des anciennes cités	30		Patiente venue d'elle même			2014-07-22		37	110	5	60	2		2		FALSE	FALSE	FALSE	FALSE	FALSE	FALSE	FALSE	FALSE	FALSE	FALSE	FALSE	FALSE	377	1	Autres diagnostics	2014-07-22	Traitement médico-chirurgical	TRUE	FALSE	FALSE	FALSE	FALSE	FALSE	TRUE	FALSE	TRUE	FALSE	FALSE	TRUE	FALSE	FALSE
Maternité de Kintambo	Quartiers des anciennes cités	2015-02-13	Quartiers résidentiels	23		Patiente référée			2014-07-24	2014-07-24 16:41:00		110	1	70	0	20	0	84	FALSE	FALSE	FALSE	FALSE	FALSE	FALSE	FALSE	FALSE	FALSE	FALSE	FALSE	FALSE	378	1	Autres diagnostics	2014-07-24	Traitement médico-chirurgical	FALSE	FALSE	TRUE	FALSE	FALSE	FALSE	TRUE	FALSE	TRUE	FALSE	FALSE	TRUE	FALSE	FALSE
Maternité de Kintambo	Quartiers des anciennes cités	2015-02-13	Quartiers des cités planifiées	20		Patiente référée	Quartiers des cités planifiées	2014-05-11	2014-05-11										FALSE	FALSE	FALSE	FALSE	FALSE	FALSE	FALSE	FALSE	FALSE	FALSE	FALSE	FALSE	379	1	Autres diagnostics	2014-05-12	Traitement médico-chirurgical	FALSE	FALSE	TRUE	FALSE	FALSE	FALSE	TRUE	FALSE	TRUE	FALSE	FALSE	FALSE	FALSE	FALSE
Maternité de Kintambo	Quartiers des anciennes cités	2015-02-13	Quartiers résidentiels	35		Patiente venue d'elle même			2014-08-13	2014-08-13 21:00:00		110	3	80	0		2		FALSE	FALSE	FALSE	FALSE	FALSE	FALSE	FALSE	FALSE	TRUE	FALSE	FALSE	FALSE	380	1	Autres diagnostics	2014-08-14	Traitement médico-chirurgical	FALSE	FALSE	TRUE	FALSE	FALSE	FALSE	TRUE	FALSE	TRUE	TRUE	FALSE	TRUE	FALSE	FALSE
Maternité de Kintambo	Quartiers des anciennes cités	2015-02-13	Quartiers des cités planifiées	21		Patiente venue d'elle même			2014-08-14			120	1	90	0	20	0	80	FALSE	FALSE	FALSE	FALSE	FALSE	FALSE	FALSE	FALSE	FALSE	FALSE	FALSE	FALSE	381	1	Autres diagnostics	2014-08-14	Traitement médico-chirurgical	FALSE	FALSE	TRUE	FALSE	FALSE	FALSE	TRUE	FALSE	TRUE	FALSE	FALSE	FALSE	FALSE	FALSE
Maternité de Kintambo	Quartiers des anciennes cités	2015-02-13	Quartiers des anciennes cités	20		Patiente venue d'elle même			2014-08-28	2014-08-28 20:50:00		110		70					TRUE	FALSE	FALSE	FALSE	FALSE	FALSE	FALSE	FALSE	FALSE	FALSE	FALSE	FALSE	382	1	Complication d'avortement provoqué	2014-08-28	Traitement médical	FALSE	FALSE	TRUE	TRUE	FALSE	FALSE	TRUE	FALSE	FALSE	FALSE	FALSE	FALSE	FALSE	FALSE
Maternité de Kintambo	Quartiers des anciennes cités	2015-02-13	Quartiers résidentiels	42	Mariée	Patiente venue d'elle même			2014-06-18			120		80					FALSE	FALSE	FALSE	FALSE	FALSE	FALSE	FALSE	FALSE	FALSE	FALSE	FALSE	TRUE	383	1	Autres diagnostics	2014-06-18	Traitement médico-chirurgical	TRUE	FALSE	FALSE	FALSE	FALSE	FALSE	TRUE	FALSE	TRUE	FALSE	FALSE	FALSE	FALSE	FALSE
Maternité de Kintambo	Quartiers des anciennes cités	2015-02-13	Quartiers des cités planifiées	36		Patiente venue d'elle même			2014-07-21	2014-07-21 07:30:00		110		70					FALSE	FALSE	FALSE	FALSE	FALSE	FALSE	FALSE	FALSE	FALSE	FALSE	TRUE	FALSE	384	1	Autres diagnostics		Traitement médico-chirurgical	FALSE	FALSE	TRUE	FALSE	FALSE	FALSE	TRUE	FALSE	TRUE	FALSE	FALSE	FALSE	FALSE	FALSE
Maternité de Kintambo	Quartiers des anciennes cités	2015-02-13	Quartiers des anciennes cités	17		Patiente venue d'elle même			2014-07-15			100	3	60	1		1		FALSE	TRUE	FALSE	FALSE	FALSE	FALSE	FALSE	FALSE	FALSE	FALSE	FALSE	FALSE	385	1	Avortement spontané	2014-07-15	Traitement médical	TRUE	FALSE	FALSE	FALSE	FALSE	FALSE	TRUE	FALSE	FALSE	FALSE	FALSE	FALSE	FALSE	FALSE
Maternité de Kintambo	Quartiers des anciennes cités	2015-02-13	Quartiers des anciennes cités	27	Mariée	Patiente venue d'elle même			2014-07-28			100	4	80	1		2		FALSE	FALSE	FALSE	TRUE	FALSE	FALSE	FALSE	FALSE	FALSE	FALSE	FALSE	FALSE	386	1	Autres diagnostics	2014-07-30	Traitement médico-chirurgical	FALSE	FALSE	TRUE	FALSE	FALSE	FALSE	TRUE	FALSE	TRUE	FALSE	FALSE	FALSE	FALSE	FALSE
Maternité de Kintambo	Quartiers des anciennes cités	2015-02-13	Quartiers des cités planifiées	35		Patiente venue d'elle même			2014-07-29	2014-07-29 08:45:00			2		0		1		FALSE	FALSE	FALSE	FALSE	FALSE	FALSE	FALSE	FALSE	FALSE	FALSE	FALSE	TRUE	387	1	Autres diagnostics	2014-07-29	Traitement médico-chirurgical	FALSE	FALSE	TRUE	FALSE	FALSE	FALSE	TRUE	FALSE	TRUE	FALSE	FALSE	TRUE	FALSE	FALSE
Maternité de Kintambo	Quartiers des anciennes cités	2015-02-13	Quartiers des cités planifiées	27	Mariée	Patiente venue d'elle même			2014-07-27	2014-07-27 02:20:00		110	4	60	3		0		FALSE	FALSE	FALSE	FALSE	FALSE	FALSE	FALSE	FALSE	TRUE	FALSE	FALSE	FALSE	388	1	Autres diagnostics	2014-07-27	Traitement médico-chirurgical	FALSE	FALSE	TRUE	FALSE	FALSE	FALSE	TRUE	FALSE	TRUE	FALSE	FALSE	TRUE	FALSE	FALSE
Maternité de Kintambo	Quartiers des anciennes cités	2015-02-12	Quartiers des cités planifiées	24		Patiente référée	Quartiers résidentiels		2014-07-22	2014-07-22 23:10:00		150	1	100	0	24	0	88	FALSE	FALSE	FALSE	FALSE	TRUE	FALSE	FALSE	FALSE	FALSE	FALSE	FALSE	FALSE	389	1	Autres diagnostics	2014-07-23	Traitement médico-chirurgical	FALSE	FALSE	TRUE	FALSE	FALSE	FALSE	TRUE	FALSE	TRUE	FALSE	FALSE	TRUE	FALSE	FALSE
Maternité de Kintambo	Quartiers des anciennes cités	2015-02-12	Quartiers résidentiels	40		Patiente référée		2014-07-11	2014-07-11	2014-07-11 20:40:00		180	5	100	4		0		FALSE	FALSE	FALSE	FALSE	FALSE	FALSE	FALSE	FALSE	TRUE	FALSE	FALSE	FALSE	390	1	Autres diagnostics	2014-07-11	Traitement médico-chirurgical	FALSE	TRUE	TRUE	FALSE	FALSE	FALSE	TRUE	TRUE	TRUE	FALSE	FALSE	TRUE	TRUE	FALSE
Maternité de Kintambo	Quartiers des anciennes cités	2015-02-12	Quartiers des cités planifiées	33		Patiente venue d'elle même			2014-07-02		36	160	2	100	1		0		FALSE	FALSE	FALSE	FALSE	TRUE	FALSE	FALSE	FALSE	FALSE	FALSE	FALSE	FALSE	391	1	Autres diagnostics		Traitement médico-chirurgical	FALSE	FALSE	TRUE	FALSE	FALSE	FALSE	TRUE	TRUE	TRUE	FALSE	FALSE	FALSE	FALSE	FALSE
Maternité de Kintambo	Quartiers des anciennes cités	2015-02-12	Quartiers des cités planifiées	24	Mariée	Patiente venue d'elle même			2014-08-12	2014-08-12 07:30:00			2		0		1		FALSE	FALSE	FALSE	FALSE	FALSE	FALSE	FALSE	FALSE	TRUE	FALSE	FALSE	FALSE	392	1	Autres diagnostics	2014-08-12	Traitement médico-chirurgical	TRUE	FALSE	FALSE	FALSE	FALSE	FALSE	TRUE	FALSE	TRUE	FALSE	FALSE	FALSE	FALSE	FALSE
Maternité de Kintambo	Quartiers des anciennes cités	2015-02-12	Quartiers résidentiels	34		Patiente venue d'elle même			2014-08-11	2014-08-11 00:25:00		90	6	60	2	20	2	60	FALSE	FALSE	FALSE	FALSE	FALSE	FALSE	FALSE	FALSE	FALSE	FALSE	FALSE	TRUE	393	1	Autres diagnostics	2014-08-12	Traitement médico-chirurgical	FALSE	FALSE	TRUE	FALSE	FALSE	FALSE	TRUE	FALSE	FALSE	FALSE	FALSE	TRUE	FALSE	FALSE
Maternité de Kintambo	Quartiers des anciennes cités	2015-02-12	Quartiers résidentiels	36		Patiente venue d'elle même			2014-07-29	2014-07-29 09:15:00			4		3		0		FALSE	FALSE	FALSE	FALSE	FALSE	FALSE	FALSE	FALSE	FALSE	FALSE	FALSE	FALSE	394	1	Autres diagnostics	2014-07-30	Traitement médico-chirurgical	FALSE	FALSE	TRUE	FALSE	FALSE	FALSE	TRUE	FALSE	FALSE	FALSE	FALSE	TRUE	FALSE	FALSE
Maternité de Kintambo	Quartiers des anciennes cités	2015-02-12	Quartiers résidentiels	42		Patiente venue d'elle même			2014-08-01			100	3	50	3		0		FALSE	FALSE	FALSE	FALSE	FALSE	FALSE	FALSE	FALSE	FALSE	FALSE	TRUE	FALSE	395	1	Autres diagnostics	2014-08-01	Traitement médico-chirurgical	FALSE	FALSE	TRUE	FALSE	FALSE	FALSE	FALSE	FALSE	TRUE	FALSE	FALSE	FALSE	FALSE	FALSE
Maternité de Kintambo	Quartiers des anciennes cités	2015-02-11			Mariée	Patiente venue d'elle même			2014-08-29			90	4	60	3		0		FALSE	FALSE	FALSE	TRUE	FALSE	FALSE	FALSE	FALSE	FALSE	FALSE	FALSE	FALSE	396	1	Autres diagnostics	2014-08-29	Traitement médico-chirurgical	FALSE	FALSE	TRUE	FALSE	FALSE	FALSE	TRUE	FALSE	TRUE	FALSE	FALSE	FALSE	FALSE	FALSE
Maternité de Kintambo	Quartiers des anciennes cités	2015-02-11	Quartiers des anciennes cités	18		Patiente venue d'elle même			2014-08-22	2014-08-22 14:50:00		120	1	80	0		0		FALSE	FALSE	FALSE	FALSE	FALSE	FALSE	FALSE	FALSE	FALSE	FALSE	FALSE	FALSE	397	1	Autres diagnostics	2014-08-23	Traitement médico-chirurgical	FALSE	FALSE	TRUE	FALSE	FALSE	FALSE	FALSE	FALSE	TRUE	FALSE	FALSE	FALSE	FALSE	FALSE
Maternité de Kintambo	Quartiers des anciennes cités	2015-02-11	Quartiers semi-ruraux	40	Mariée	Patiente référée		2014-08-30	2014-08-30	2014-08-30 15:20:00		100	11	60	10		0		FALSE	FALSE	FALSE	FALSE	FALSE	FALSE	FALSE	FALSE	TRUE	FALSE	FALSE	FALSE	398	1	Autres diagnostics	2014-08-30	Traitement médico-chirurgical	TRUE	FALSE	FALSE	FALSE	FALSE	FALSE	TRUE	FALSE	TRUE	FALSE	FALSE	FALSE	FALSE	FALSE
Maternité de Kintambo	Quartiers des anciennes cités	2015-02-11	Quartiers excentriques et d'extension	27		Patiente référée		2014-08-01	2014-08-01	2014-08-01 17:00:00			1		0		0		FALSE	FALSE	FALSE	FALSE	FALSE	FALSE	TRUE	FALSE	FALSE	FALSE	FALSE	FALSE	399	1	Autres diagnostics	2014-08-01	Traitement médico-chirurgical	FALSE	FALSE	TRUE	FALSE	FALSE	FALSE	TRUE	FALSE	TRUE	FALSE	FALSE	TRUE	FALSE	FALSE
Maternité de Kintambo	Quartiers des anciennes cités	2015-02-11		21		Patiente référée	Quartiers résidentiels		2014-08-15	2014-08-15 13:00:00		110	1	70	0		0		FALSE	FALSE	FALSE	FALSE	FALSE	FALSE	FALSE	FALSE	FALSE	FALSE	FALSE	FALSE	400	1	Autres diagnostics	2014-08-15	Traitement médico-chirurgical	FALSE	FALSE	TRUE	FALSE	FALSE	FALSE	TRUE	FALSE	TRUE	FALSE	FALSE	FALSE	FALSE	FALSE
Maternité de Kintambo	Quartiers des anciennes cités	2015-02-11	Quartiers résidentiels	21		Patiente référée	Quartiers résidentiels		2014-08-01			150	2	110	0		2		FALSE	FALSE	FALSE	FALSE	TRUE	FALSE	FALSE	FALSE	FALSE	FALSE	FALSE	FALSE	401	1	Autres diagnostics	2014-08-01	Traitement médico-chirurgical	FALSE	FALSE	TRUE	FALSE	FALSE	FALSE	TRUE	TRUE	FALSE	TRUE	FALSE	FALSE	FALSE	FALSE
Maternité de Kintambo	Quartiers des anciennes cités	2015-02-11	Quartiers des anciennes cités	30		Patiente venue d'elle même			2014-09-07			110	2	80	1		0		FALSE	FALSE	FALSE	FALSE	FALSE	FALSE	FALSE	FALSE	FALSE	TRUE	FALSE	FALSE	402	1	Autres diagnostics	2014-09-07	Traitement médico-chirurgical	FALSE	FALSE	TRUE	FALSE	FALSE	FALSE	TRUE	FALSE	TRUE	FALSE	FALSE	TRUE	FALSE	FALSE
Maternité de Kintambo	Quartiers des anciennes cités	2015-02-11		27		Patiente référée	Quartiers résidentiels	2014-08-25	2014-08-25	2014-08-25 13:15:00		180	4	100	0		3		FALSE	FALSE	FALSE	FALSE	TRUE	FALSE	FALSE	FALSE	FALSE	FALSE	FALSE	FALSE	403	1	Autres diagnostics	2014-08-25	Traitement médico-chirurgical	TRUE	FALSE	FALSE	FALSE	FALSE	FALSE	FALSE	TRUE	FALSE	TRUE	FALSE	TRUE	FALSE	FALSE
Maternité de Kintambo	Quartiers des anciennes cités	2015-02-11	Quartiers résidentiels	27		Patiente venue d'elle même			2014-09-05			100	3	60	2		0		FALSE	FALSE	FALSE	FALSE	FALSE	FALSE	FALSE	FALSE	FALSE	FALSE	FALSE	FALSE	404	1	Autres diagnostics	2014-09-05	Traitement médico-chirurgical	TRUE	FALSE	FALSE	FALSE	FALSE	FALSE	TRUE	FALSE	TRUE	FALSE	FALSE	TRUE	FALSE	FALSE
Maternité de Kintambo	Quartiers des anciennes cités	2015-02-12	Quartiers des cités planifiées	24		Patiente venue d'elle même			2014-07-18	2014-07-18 20:15:00		90	3	60	2		0		FALSE	FALSE	FALSE	FALSE	FALSE	FALSE	FALSE	FALSE	FALSE	FALSE	FALSE	FALSE	405	1	Autres diagnostics	2014-07-18	Traitement médico-chirurgical	FALSE	FALSE	TRUE	FALSE	FALSE	FALSE	TRUE	FALSE	TRUE	FALSE	FALSE	FALSE	FALSE	FALSE
Maternité de Kintambo	Quartiers des anciennes cités	2015-02-12	Quartiers résidentiels	41		Patiente venue d'elle même			2014-09-22	2014-09-22 10:40:00		110	2	60	1		0		FALSE	FALSE	FALSE	FALSE	FALSE	FALSE	FALSE	FALSE	FALSE	FALSE	FALSE	FALSE	406	1	Autres diagnostics	2014-09-22	Traitement médico-chirurgical	FALSE	FALSE	TRUE	FALSE	FALSE	FALSE	TRUE	FALSE	TRUE	FALSE	FALSE	TRUE	FALSE	FALSE
Maternité de Kintambo	Quartiers des anciennes cités	2015-02-12	Quartiers résidentiels	26		Patiente venue d'elle même			2014-09-19			120	2	80	1	24	0	92	FALSE	FALSE	FALSE	FALSE	FALSE	FALSE	FALSE	FALSE	FALSE	FALSE	FALSE	FALSE	407	1	Autres diagnostics		Traitement médico-chirurgical	FALSE	FALSE	TRUE	FALSE	FALSE	FALSE	TRUE	FALSE	TRUE	FALSE	FALSE	TRUE	FALSE	FALSE
Maternité de Kintambo	Quartiers des anciennes cités	2015-02-12	Quartiers des anciennes cités	33	Mariée	Patiente venue d'elle même			2014-09-13				6		5		0		FALSE	FALSE	FALSE	FALSE	FALSE	FALSE	FALSE	FALSE	FALSE	FALSE	FALSE	FALSE	408	1	Autres diagnostics	2014-09-14	Traitement médico-chirurgical	FALSE	FALSE	TRUE	FALSE	FALSE	FALSE	TRUE	FALSE	TRUE	FALSE	FALSE	FALSE	FALSE	TRUE
Maternité de Kintambo	Quartiers des anciennes cités	2015-02-12	Quartiers des anciennes cités			Patiente venue d'elle même			2014-06-27			110	1	80	1		0		FALSE	FALSE	FALSE	FALSE	FALSE	FALSE	FALSE	FALSE	FALSE	FALSE	FALSE	FALSE	409	1	Autres diagnostics	2014-06-27	Traitement médico-chirurgical	FALSE	FALSE	TRUE	FALSE	FALSE	FALSE	TRUE	FALSE	TRUE	FALSE	FALSE	FALSE	FALSE	FALSE
Maternité de Kintambo	Quartiers des anciennes cités	2015-02-12	Quartiers résidentiels	29		Patiente venue d'elle même			2014-09-08				4		2		1		FALSE	FALSE	FALSE	TRUE	FALSE	FALSE	FALSE	FALSE	FALSE	FALSE	FALSE	FALSE	410	1	Autres diagnostics	2014-09-08	Traitement médico-chirurgical	FALSE	FALSE	TRUE	FALSE	FALSE	FALSE	TRUE	FALSE	TRUE	FALSE	FALSE	FALSE	FALSE	FALSE
Maternité de Kintambo	Quartiers des anciennes cités	2015-02-24	Quartiers excentriques et d'extension	36		Patiente venue d'elle même			2014-05-26				2		1		0		FALSE	FALSE	FALSE	TRUE	FALSE	FALSE	FALSE	FALSE	FALSE	FALSE	FALSE	FALSE	411	1	Autres diagnostics	2014-05-26	Traitement médico-chirurgical	FALSE	FALSE	TRUE	FALSE	FALSE	FALSE	TRUE	FALSE	FALSE	TRUE	FALSE	TRUE	FALSE	FALSE
Maternité de Kintambo	Quartiers des anciennes cités	2015-02-24	Quartiers des anciennes cités	37		Patiente venue d'elle même			2014-01-18	2014-01-18 19:00:00		80	5	50	4	40	0	112	TRUE	FALSE	FALSE	FALSE	FALSE	FALSE	FALSE	FALSE	FALSE	FALSE	FALSE	FALSE	412	1	Complication d'avortement provoqué		Traitement médical	FALSE	FALSE	FALSE	FALSE	FALSE	FALSE	TRUE	FALSE	FALSE	FALSE	FALSE	FALSE	FALSE	FALSE
Maternité de Kintambo	Quartiers des anciennes cités	2015-02-24	Quartiers semi-ruraux	19		Patiente référée	Quartiers semi-ruraux		2014-01-04	2014-01-04 17:30:00		70		40		35		132	TRUE	FALSE	FALSE	FALSE	FALSE	FALSE	FALSE	FALSE	FALSE	FALSE	FALSE	FALSE	413	1	Complication d'avortement provoqué		Traitement médico-chirurgical	TRUE	FALSE	FALSE	TRUE	FALSE	FALSE	FALSE	FALSE	FALSE	TRUE	FALSE	FALSE	FALSE	FALSE
Maternité de Kintambo	Quartiers des anciennes cités	2015-02-24	Quartiers excentriques et d'extension	25		Patiente référée	Quartiers excentriques et d'extension	2014-02-07	2014-02-08	2014-02-08 06:25:00		120	4	80	1		2		FALSE	FALSE	FALSE	FALSE	FALSE	FALSE	FALSE	FALSE	FALSE	FALSE	FALSE	FALSE	414	1	Autres diagnostics	2014-02-08	Traitement médico-chirurgical	FALSE	FALSE	TRUE	FALSE	FALSE	FALSE	TRUE	FALSE	TRUE	TRUE	FALSE	TRUE	FALSE	FALSE
Maternité de Kintambo	Quartiers des anciennes cités	2015-02-24	Quartiers des anciennes cités	21		Patiente venue d'elle même			2014-03-26				2		0		1		FALSE	FALSE	FALSE	FALSE	FALSE	FALSE	FALSE	FALSE	FALSE	FALSE	FALSE	FALSE	415	1	Autres diagnostics	2014-03-26	Traitement médico-chirurgical	FALSE	FALSE	FALSE	FALSE	FALSE	FALSE	FALSE	FALSE	FALSE	FALSE	FALSE	FALSE	FALSE	FALSE
Maternité de Kintambo	Quartiers des anciennes cités	2015-02-24	Quartiers résidentiels			Patiente venue d'elle même			2014-02-09	2014-02-09 16:30:00		130	5	70	3		1		FALSE	FALSE	FALSE	FALSE	FALSE	FALSE	FALSE	FALSE	FALSE	TRUE	FALSE	FALSE	416	1	Autres diagnostics	2014-02-09	Traitement médico-chirurgical	FALSE	FALSE	FALSE	FALSE	FALSE	FALSE	TRUE	FALSE	FALSE	FALSE	FALSE	FALSE	FALSE	FALSE
Maternité de Kintambo	Quartiers des anciennes cités	2015-02-24	Quartiers semi-ruraux	18		Patiente référée		2014-05-21	2014-05-21			80		60				124	FALSE	FALSE	FALSE	FALSE	FALSE	FALSE	FALSE	FALSE	FALSE	FALSE	FALSE	FALSE	417	1	Autres diagnostics	2014-05-21	Traitement médical	TRUE	TRUE	FALSE	TRUE	FALSE	FALSE	TRUE	FALSE	FALSE	TRUE	TRUE	FALSE	FALSE	FALSE
Maternité de Kintambo	Quartiers des anciennes cités	2015-02-24	Quartiers résidentiels	38		Patiente référée	Quartiers résidentiels	2014-05-09	2014-05-09	2014-05-09 04:45:00									FALSE	FALSE	FALSE	FALSE	FALSE	FALSE	FALSE	FALSE	FALSE	FALSE	FALSE	FALSE	418	1	Autres diagnostics			FALSE	FALSE	FALSE	FALSE	FALSE	FALSE	FALSE	FALSE	FALSE	FALSE	TRUE	FALSE	FALSE	FALSE
Maternité de Kintambo	Quartiers des anciennes cités	2015-02-24	Quartiers résidentiels	38		Patiente référée		2014-10-20	2014-10-20	2014-10-20 00:30:00		60	2	40	1	32	0	122	TRUE	FALSE	FALSE	FALSE	FALSE	FALSE	FALSE	FALSE	FALSE	FALSE	FALSE	FALSE	419	1	Complication d'avortement provoqué	2014-10-20	Traitement médical	FALSE	FALSE	TRUE	FALSE	FALSE	FALSE	TRUE	FALSE	FALSE	TRUE	FALSE	FALSE	FALSE	FALSE
Maternité de Kintambo	Quartiers des anciennes cités	2015-02-24	Quartiers résidentiels	30		Patiente venue d'elle même			2014-09-08			110	4	60	2	16	1	80	FALSE	FALSE	FALSE	TRUE	FALSE	FALSE	FALSE	FALSE	FALSE	FALSE	FALSE	FALSE	420	1	Autres diagnostics	2014-09-08	Traitement médico-chirurgical	FALSE	FALSE	TRUE	FALSE	FALSE	FALSE	TRUE	FALSE	TRUE	FALSE	FALSE	FALSE	FALSE	FALSE
Maternité de Kintambo	Quartiers des anciennes cités	2015-02-23	Quartiers résidentiels	28		Patiente venue d'elle même			2014-04-28				1		0		0		FALSE	FALSE	FALSE	FALSE	FALSE	FALSE	FALSE	FALSE	FALSE	FALSE	FALSE	FALSE	421	1	Autres diagnostics	2014-04-28	Traitement médico-chirurgical	FALSE	FALSE	TRUE	FALSE	FALSE	FALSE	TRUE	FALSE	FALSE	FALSE	FALSE	TRUE	FALSE	FALSE
Maternité de Kintambo	Quartiers des anciennes cités	2015-02-23	Quartiers des cités planifiées	31		Patiente venue d'elle même			2014-01-13	2014-01-13 09:00:00			2		0		1		FALSE	FALSE	FALSE	FALSE	FALSE	FALSE	FALSE	FALSE	FALSE	FALSE	FALSE	FALSE	422	1	Autres diagnostics		Traitement médico-chirurgical	TRUE	FALSE	FALSE	FALSE	FALSE	FALSE	TRUE	FALSE	TRUE	TRUE	FALSE	FALSE	FALSE	FALSE
Maternité de Kintambo	Quartiers des anciennes cités	2015-02-23	Quartiers des cités planifiées	41		Patiente venue d'elle même			2014-01-09		36.2	170	11	100	0		10		FALSE	FALSE	FALSE	FALSE	TRUE	FALSE	FALSE	FALSE	FALSE	FALSE	FALSE	TRUE	423	1	Autres diagnostics	2014-01-09	Traitement médico-chirurgical	FALSE	FALSE	TRUE	FALSE	FALSE	FALSE	TRUE	FALSE	TRUE	FALSE	FALSE	FALSE	FALSE	FALSE
Maternité de Kintambo	Quartiers des anciennes cités	2015-02-23	Quartiers des anciennes cités	27		Patiente référée	Quartiers résidentiels	2014-08-25	2014-08-25	2014-08-25 13:20:00		170	4	100	0		3		FALSE	FALSE	FALSE	FALSE	TRUE	FALSE	FALSE	FALSE	FALSE	FALSE	FALSE	FALSE	424	1	Autres diagnostics	2014-08-25	Traitement médico-chirurgical	FALSE	FALSE	TRUE	FALSE	FALSE	FALSE	FALSE	FALSE	TRUE	FALSE	FALSE	TRUE	FALSE	FALSE
Maternité de Kintambo	Quartiers des anciennes cités	2015-02-23	Quartiers des anciennes cités	30		Patiente venue d'elle même			2014-09-23	2014-09-23 06:57:00			2		1		0		TRUE	FALSE	FALSE	FALSE	FALSE	FALSE	FALSE	FALSE	FALSE	FALSE	FALSE	FALSE	425	1	Complication d'avortement provoqué	2014-09-23	Traitement médical	TRUE	FALSE	FALSE	FALSE	FALSE	FALSE	TRUE	FALSE	TRUE	FALSE	FALSE	FALSE	FALSE	FALSE
Maternité de Kintambo	Quartiers des anciennes cités	2015-02-24	Quartiers semi-ruraux	25	Celibataire	Patiente référée	Quartiers semi-ruraux		2014-10-31			90	1	70	0	56	0	128	FALSE	FALSE	FALSE	FALSE	FALSE	FALSE	TRUE	FALSE	FALSE	FALSE	FALSE	FALSE	426	1	Autres diagnostics		Traitement médical	FALSE	FALSE	FALSE	FALSE	FALSE	FALSE	FALSE	FALSE	FALSE	TRUE	FALSE	FALSE	FALSE	FALSE
Maternité de Kintambo	Quartiers des anciennes cités	2015-02-24	Quartiers résidentiels	25		Patiente venue d'elle même			2014-01-18	2014-01-18 23:00:00									TRUE	FALSE	FALSE	FALSE	FALSE	FALSE	FALSE	FALSE	FALSE	FALSE	FALSE	FALSE	427	1	Complication d'avortement provoqué		Traitement médical	FALSE	FALSE	TRUE	FALSE	FALSE	FALSE	FALSE	FALSE	FALSE	TRUE	FALSE	TRUE	FALSE	FALSE
Maternité de Kintambo	Quartiers des anciennes cités	2015-02-10	Quartiers des anciennes cités	23		Patiente référée		2013-12-29	2014-01-01		36	120	1	80	0		0		FALSE	FALSE	FALSE	FALSE	FALSE	TRUE	TRUE	FALSE	FALSE	FALSE	FALSE	FALSE	428	1	Autres diagnostics	2014-01-02	Traitement médical	TRUE	FALSE	FALSE	FALSE	FALSE	FALSE	FALSE	FALSE	FALSE	TRUE	FALSE	FALSE	FALSE	FALSE
Maternité de Kintambo	Quartiers des anciennes cités	2015-02-10	Quartiers des cités planifiées	22		Patiente référée	Quartiers des cités planifiées	2014-01-15	2014-01-15				1		0		0		FALSE	FALSE	FALSE	FALSE	FALSE	FALSE	FALSE	FALSE	TRUE	FALSE	FALSE	FALSE	429	1	Autres diagnostics	2014-01-15	Traitement médico-chirurgical	FALSE	FALSE	FALSE	FALSE	TRUE	FALSE	TRUE	FALSE	TRUE	FALSE	FALSE	FALSE	FALSE	FALSE
Maternité de Kintambo	Quartiers des anciennes cités	2015-02-10	Quartiers des anciennes cités	30		Patiente venue d'elle même			2014-01-02			90	2	50	1		0		TRUE	FALSE	FALSE	FALSE	FALSE	FALSE	FALSE	FALSE	FALSE	FALSE	FALSE	FALSE	430	1	Complication d'avortement provoqué	2014-01-02	Traitement médico-chirurgical	FALSE	FALSE	FALSE	FALSE	FALSE	FALSE	TRUE	FALSE	TRUE	FALSE	FALSE	FALSE	FALSE	FALSE
Maternité de Kintambo	Quartiers des anciennes cités	2015-02-10	Quartiers des anciennes cités	14		Patiente venue d'elle même			2014-01-28										FALSE	FALSE	FALSE	FALSE	FALSE	FALSE	FALSE	FALSE	FALSE	FALSE	FALSE	TRUE	431	1	Autres diagnostics		Traitement médical	FALSE	TRUE	TRUE	TRUE	FALSE	FALSE	FALSE	FALSE	FALSE	TRUE	FALSE	FALSE	FALSE	FALSE
Maternité de Kintambo	Quartiers des anciennes cités	2015-02-10	Quartiers résidentiels	31					2014-12-31		36.3		2		0		1		FALSE	FALSE	FALSE	FALSE	FALSE	FALSE	FALSE	FALSE	FALSE	FALSE	FALSE	FALSE	432	1	Autres diagnostics	2015-01-03	Traitement médico-chirurgical	FALSE	FALSE	TRUE	FALSE	FALSE	FALSE	TRUE	FALSE	TRUE	FALSE	FALSE	FALSE	FALSE	FALSE
Maternité de Kintambo	Quartiers des anciennes cités	2015-02-10	Quartiers excentriques et d'extension	27		Patiente venue d'elle même			2014-01-03		36.2	130	2	80	0		1		FALSE	FALSE	FALSE	FALSE	TRUE	FALSE	FALSE	FALSE	FALSE	FALSE	FALSE	FALSE	433	1	Autres diagnostics	2014-01-03	Traitement médico-chirurgical	FALSE	FALSE	FALSE	FALSE	TRUE	FALSE	TRUE	FALSE	TRUE	FALSE	FALSE	TRUE	FALSE	FALSE
Maternité de Kintambo	Quartiers des anciennes cités	2015-02-09	Quartiers résidentiels	39		Patiente venue d'elle même			2014-07-21			110	6	70	5		0		FALSE	FALSE	FALSE	TRUE	FALSE	FALSE	FALSE	FALSE	FALSE	TRUE	FALSE	FALSE	434	1	Autres diagnostics	2014-07-21	Traitement médico-chirurgical	FALSE	FALSE	TRUE	TRUE	FALSE	FALSE	TRUE	FALSE	FALSE	FALSE	FALSE	TRUE	FALSE	FALSE
Maternité de Kintambo	Quartiers des anciennes cités	2015-02-09	Quartiers résidentiels	36	Mariée	Patiente référée	Quartiers des anciennes cités	2014-06-23	2014-06-23			120	2	60	1		0		FALSE	FALSE	FALSE	FALSE	FALSE	FALSE	FALSE	FALSE	FALSE	FALSE	FALSE	FALSE	435	1	Autres diagnostics		Traitement médico-chirurgical	FALSE	FALSE	TRUE	FALSE	FALSE	FALSE	TRUE	FALSE	TRUE	FALSE	FALSE	TRUE	FALSE	TRUE
Maternité de Kintambo	Quartiers des anciennes cités	2015-02-09	Quartiers des anciennes cités	23	Mariée	Patiente venue d'elle même			2014-06-22	2014-06-22 06:30:00		130	1	80	0		0		FALSE	FALSE	FALSE	FALSE	TRUE	FALSE	FALSE	FALSE	FALSE	FALSE	FALSE	FALSE	436	1	Autres diagnostics	2014-06-22	Traitement médico-chirurgical	FALSE	FALSE	FALSE	FALSE	TRUE	FALSE	TRUE	FALSE	TRUE	FALSE	FALSE	FALSE	FALSE	FALSE
Maternité de Kintambo	Quartiers des anciennes cités	2015-02-09	Quartiers des anciennes cités	26		Patiente référée		2014-07-01	2014-07-01				3		1		1		FALSE	FALSE	FALSE	FALSE	FALSE	FALSE	FALSE	FALSE	FALSE	TRUE	FALSE	FALSE	437	1	Autres diagnostics	2014-07-02	Traitement médico-chirurgical	FALSE	FALSE	TRUE	FALSE	FALSE	FALSE	FALSE	FALSE	FALSE	FALSE	FALSE	FALSE	FALSE	FALSE
Maternité de Kintambo	Quartiers des anciennes cités	2015-02-09	Quartiers résidentiels	43		Patiente venue d'elle même			2014-06-14				3		2		0		FALSE	FALSE	FALSE	FALSE	FALSE	FALSE	FALSE	FALSE	FALSE	FALSE	FALSE	TRUE	438	1	Autres diagnostics	2014-06-14	Traitement médico-chirurgical	FALSE	FALSE	FALSE	FALSE	TRUE	FALSE	TRUE	FALSE	TRUE	FALSE	FALSE	TRUE	FALSE	FALSE
Maternité de Kintambo	Quartiers des anciennes cités	2015-02-09	Quartiers des cités planifiées	24		Patiente venue d'elle même			2014-06-15				1		0		0		FALSE	FALSE	FALSE	FALSE	FALSE	FALSE	FALSE	FALSE	FALSE	FALSE	FALSE	FALSE	439	1	Autres diagnostics	2014-06-15	Traitement médico-chirurgical	TRUE	TRUE	FALSE	FALSE	FALSE	FALSE	TRUE	FALSE	TRUE	FALSE	FALSE	TRUE	FALSE	FALSE
Maternité de Kintambo	Quartiers des anciennes cités	2015-02-09	Quartiers des anciennes cités	25	Mariée	Patiente référée	Quartiers résidentiels	2014-07-18	2014-07-18				1		0		0		FALSE	FALSE	FALSE	FALSE	FALSE	FALSE	FALSE	FALSE	FALSE	FALSE	FALSE	FALSE	440	1	Autres diagnostics	2014-07-18	Traitement médico-chirurgical	FALSE	FALSE	TRUE	FALSE	FALSE	FALSE	TRUE	FALSE	TRUE	TRUE	FALSE	TRUE	FALSE	FALSE
Maternité de Kintambo	Quartiers des anciennes cités	2015-02-09	Quartiers résidentiels	30		Patiente venue d'elle même			2014-07-03		37	120	2	80	1		0		FALSE	FALSE	FALSE	TRUE	FALSE	FALSE	FALSE	FALSE	FALSE	FALSE	FALSE	FALSE	441	1	Autres diagnostics	2014-07-03	Traitement médico-chirurgical	FALSE	FALSE	TRUE	FALSE	FALSE	FALSE	TRUE	FALSE	TRUE	FALSE	FALSE	FALSE	FALSE	FALSE
Maternité de Kintambo	Quartiers des anciennes cités	2015-02-09	Quartiers résidentiels	39		Patiente venue d'elle même			2014-07-13			100	5	60	4		0		FALSE	FALSE	FALSE	TRUE	FALSE	FALSE	FALSE	FALSE	FALSE	FALSE	FALSE	FALSE	442	1	Autres diagnostics	2014-07-13	Traitement médico-chirurgical	FALSE	FALSE	FALSE	FALSE	TRUE	FALSE	TRUE	FALSE	TRUE	FALSE	FALSE	FALSE	FALSE	FALSE
Maternité de Kintambo	Quartiers des anciennes cités	2015-02-09		32		Patiente venue d'elle même			2014-07-15		36	100	3	60	2		0		FALSE	FALSE	FALSE	TRUE	FALSE	FALSE	FALSE	FALSE	FALSE	FALSE	FALSE	FALSE	443	1	Autres diagnostics	2014-07-15	Traitement médico-chirurgical	FALSE	FALSE	TRUE	FALSE	FALSE	FALSE	TRUE	FALSE	TRUE	FALSE	FALSE	TRUE	FALSE	FALSE
Maternité de Kintambo	Quartiers des anciennes cités	2015-02-09	Quartiers des anciennes cités	27		Patiente venue d'elle même			2014-07-05			120	3	70	2		0		FALSE	FALSE	FALSE	TRUE	FALSE	FALSE	FALSE	FALSE	FALSE	FALSE	FALSE	FALSE	444	1	Autres diagnostics	2014-07-05	Traitement médico-chirurgical	FALSE	FALSE	FALSE	FALSE	TRUE	FALSE	TRUE	FALSE	FALSE	FALSE	FALSE	FALSE	FALSE	FALSE
Maternité de Kintambo	Quartiers des anciennes cités	2015-02-09	Quartiers résidentiels	36		Patiente venue d'elle même			2014-07-04	2014-07-04		120	1	80	0		0		FALSE	FALSE	FALSE	FALSE	FALSE	FALSE	FALSE	FALSE	FALSE	FALSE	TRUE	FALSE	445	1	Autres diagnostics	2014-07-04	Traitement médico-chirurgical	FALSE	FALSE	FALSE	FALSE	TRUE	FALSE	TRUE	FALSE	TRUE	FALSE	FALSE	FALSE	FALSE	FALSE
Maternité de Kintambo	Quartiers des anciennes cités	2015-02-09	Quartiers résidentiels	16		Patiente venue d'elle même			2014-06-01	2014-06-01 18:30:00			1		0		0		FALSE	FALSE	FALSE	FALSE	FALSE	FALSE	FALSE	FALSE	FALSE	FALSE	FALSE	FALSE	446	1	Autres diagnostics		Traitement médico-chirurgical	FALSE	FALSE	TRUE	FALSE	FALSE	FALSE	TRUE	FALSE	TRUE	FALSE	FALSE	TRUE	FALSE	FALSE
Maternité de Kintambo	Quartiers des anciennes cités	2015-02-09	Quartiers résidentiels	33		Patiente venue d'elle même			2014-07-14	2014-07-14 14:40:00	36.2	80	9	60	7		1		FALSE	FALSE	FALSE	FALSE	FALSE	FALSE	FALSE	FALSE	FALSE	FALSE	FALSE	FALSE	447	1	Autres diagnostics	2014-07-14	Traitement médico-chirurgical	FALSE	FALSE	FALSE	FALSE	FALSE	FALSE	TRUE	FALSE	TRUE	FALSE	FALSE	FALSE	FALSE	TRUE
Maternité de Kintambo	Quartiers des anciennes cités	2015-02-09	Quartiers des anciennes cités	35		Patiente venue d'elle même			2014-07-03	2014-07-03 14:30:00	36.1	160	4	110	2	20	1	76	FALSE	FALSE	FALSE	FALSE	TRUE	FALSE	FALSE	FALSE	FALSE	FALSE	FALSE	FALSE	448	1	Autres diagnostics	2014-07-03	Traitement médico-chirurgical	FALSE	FALSE	TRUE	FALSE	FALSE	FALSE	TRUE	FALSE	TRUE	FALSE	FALSE	FALSE	FALSE	FALSE
Maternité de Kintambo	Quartiers des anciennes cités	2015-02-09	Quartiers résidentiels	38	Mariée	Patiente venue d'elle même			2014-07-15			100	2	70	1		0		FALSE	FALSE	FALSE	FALSE	FALSE	FALSE	FALSE	FALSE	FALSE	FALSE	FALSE	TRUE	449	1	Autres diagnostics	2014-07-15	Traitement médico-chirurgical	FALSE	FALSE	TRUE	FALSE	FALSE	FALSE	TRUE	FALSE	TRUE	FALSE	FALSE	FALSE	FALSE	FALSE
Maternité de Kintambo	Quartiers des anciennes cités	2015-02-09	Quartiers résidentiels	33		Patiente venue d'elle même			2014-07-08			110	5	80	4		0		FALSE	FALSE	FALSE	TRUE	FALSE	FALSE	FALSE	FALSE	FALSE	FALSE	FALSE	FALSE	450	1	Autres diagnostics	2014-07-08	Traitement médico-chirurgical	TRUE	FALSE	FALSE	FALSE	FALSE	FALSE	TRUE	FALSE	FALSE	FALSE	FALSE	TRUE	FALSE	FALSE
Maternité de Kintambo	Quartiers des anciennes cités	2015-02-09	Quartiers des cités planifiées	24		Patiente venue d'elle même			2014-07-12	2014-07-12 09:30:00		120	1	60	0	20	0	84	FALSE	FALSE	FALSE	FALSE	FALSE	FALSE	FALSE	FALSE	FALSE	FALSE	FALSE	TRUE	451	1	Autres diagnostics	2014-07-12	Traitement médico-chirurgical	FALSE	FALSE	TRUE	FALSE	FALSE	FALSE	TRUE	FALSE	FALSE	FALSE	FALSE	TRUE	FALSE	FALSE
Maternité de Kintambo	Quartiers des anciennes cités	2015-02-09	Quartiers des cités planifiées	38		Patiente venue d'elle même			2014-06-12			130	3	80	0		2		FALSE	FALSE	FALSE	FALSE	FALSE	FALSE	FALSE	FALSE	FALSE	FALSE	FALSE	FALSE	452	1	Autres diagnostics	2014-06-12	Traitement médico-chirurgical	FALSE	FALSE	FALSE	FALSE	FALSE	FALSE	FALSE	FALSE	FALSE	TRUE	FALSE	FALSE	FALSE	TRUE
Maternité de Kintambo	Quartiers des anciennes cités	2015-02-07	Quartiers résidentiels	29		Patiente venue d'elle même			2014-05-05			100	2	60	1		0		FALSE	FALSE	FALSE	TRUE	FALSE	FALSE	FALSE	FALSE	FALSE	FALSE	FALSE	FALSE	453	1	Autres diagnostics	2014-05-05	Traitement médico-chirurgical	FALSE	FALSE	TRUE	FALSE	FALSE	FALSE	TRUE	FALSE	TRUE	FALSE	FALSE	TRUE	FALSE	FALSE
Maternité de Kintambo	Quartiers des anciennes cités	2015-02-07	Quartiers des cités planifiées	30		Patiente venue d'elle même			2014-04-30	2014-04-30 13:45:00		120	1	80	0		0		FALSE	FALSE	FALSE	TRUE	FALSE	FALSE	FALSE	FALSE	FALSE	FALSE	FALSE	FALSE	454	1	Autres diagnostics	2014-04-30	Traitement médico-chirurgical	FALSE	FALSE	TRUE	FALSE	FALSE	FALSE	TRUE	FALSE	TRUE	FALSE	FALSE	FALSE	FALSE	FALSE
Maternité de Kintambo	Quartiers des anciennes cités	2015-02-07	Quartiers des anciennes cités	29		Patiente venue d'elle même			2014-05-09				2		0		1		FALSE	FALSE	FALSE	FALSE	FALSE	FALSE	FALSE	FALSE	FALSE	FALSE	FALSE	FALSE	455	1	Autres diagnostics	2014-05-09	Traitement médico-chirurgical	TRUE	FALSE	FALSE	FALSE	FALSE	FALSE	TRUE	FALSE	FALSE	FALSE	FALSE	TRUE	FALSE	FALSE
Maternité de Kintambo	Quartiers des anciennes cités	2015-02-07	Quartiers résidentiels	31		Patiente venue d'elle même			2014-05-09				5		2		2		FALSE	FALSE	FALSE	TRUE	FALSE	FALSE	FALSE	FALSE	FALSE	FALSE	FALSE	FALSE	456	1	Autres diagnostics	2014-05-09	Traitement médico-chirurgical	TRUE	FALSE	FALSE	FALSE	FALSE	FALSE	TRUE	FALSE	TRUE	FALSE	FALSE	TRUE	FALSE	FALSE
Maternité de Kintambo	Quartiers des anciennes cités	2015-02-07	Quartiers résidentiels	41		Patiente venue d'elle même			2014-05-06			130	9	80	5		3		FALSE	FALSE	FALSE	FALSE	TRUE	FALSE	FALSE	FALSE	FALSE	FALSE	FALSE	FALSE	457	1	Autres diagnostics	2014-05-06	Traitement médico-chirurgical	TRUE	FALSE	FALSE	FALSE	FALSE	FALSE	TRUE	FALSE	TRUE	FALSE	FALSE	TRUE	FALSE	FALSE
Maternité de Kintambo	Quartiers des anciennes cités	2015-02-07	Quartiers des anciennes cités	38	Mariée	Patiente référée	Quartiers des anciennes cités	2014-04-20	2014-04-20	2014-04-20 03:40:00		90	2	60	1		0		FALSE	FALSE	FALSE	FALSE	FALSE	FALSE	FALSE	FALSE	TRUE	FALSE	FALSE	FALSE	458	1	Autres diagnostics		Traitement médico-chirurgical	FALSE	FALSE	TRUE	FALSE	FALSE	FALSE	FALSE	FALSE	FALSE	FALSE	FALSE	TRUE	FALSE	FALSE
Maternité de Kintambo	Quartiers des anciennes cités	2015-02-07	Quartiers résidentiels	20	Celibataire	Patiente référée		2014-02-01	2014-02-01	2014-02-01 19:05:00			1		0		0		FALSE	FALSE	FALSE	FALSE	FALSE	FALSE	FALSE	FALSE	FALSE	FALSE	FALSE	FALSE	459	1	Autres diagnostics	2014-02-01	Traitement médico-chirurgical	FALSE	FALSE	TRUE	FALSE	FALSE	FALSE	TRUE	FALSE	TRUE	FALSE	FALSE	TRUE	FALSE	FALSE
Maternité de Kintambo	Quartiers des anciennes cités	2015-02-07	Quartiers résidentiels	40	Mariée	Patiente venue d'elle même			2014-03-12			210		110					FALSE	FALSE	FALSE	FALSE	TRUE	FALSE	FALSE	FALSE	FALSE	FALSE	FALSE	FALSE	460	1	Autres diagnostics	2014-03-12	Traitement médico-chirurgical	FALSE	FALSE	TRUE	TRUE	FALSE	FALSE	TRUE	TRUE	TRUE	FALSE	FALSE	FALSE	FALSE	FALSE
Maternité de Kintambo	Quartiers des anciennes cités	2015-02-07	Quartiers résidentiels	27		Patiente venue d'elle même			2014-03-02	2014-03-02 20:30:00		100	3	60	0		2		FALSE	FALSE	FALSE	FALSE	FALSE	FALSE	FALSE	FALSE	TRUE	TRUE	FALSE	FALSE	461	1	Autres diagnostics		Traitement médico-chirurgical	TRUE	FALSE	FALSE	FALSE	FALSE	FALSE	TRUE	FALSE	FALSE	FALSE	FALSE	TRUE	FALSE	FALSE
Maternité de Kintambo	Quartiers des anciennes cités	2015-02-07	Quartiers résidentiels	21		Patiente venue d'elle même			2014-03-13	2014-03-13 09:00:00		110	2	70	1	20	0	96	FALSE	FALSE	FALSE	FALSE	FALSE	FALSE	FALSE	FALSE	FALSE	FALSE	FALSE	FALSE	462	1	Autres diagnostics		Traitement médico-chirurgical	FALSE	TRUE	TRUE	TRUE	FALSE	FALSE	TRUE	FALSE	TRUE	FALSE	FALSE	FALSE	FALSE	TRUE
Maternité de Kintambo	Quartiers des anciennes cités	2015-02-07	Quartiers des cités planifiées	34		Patiente venue d'elle même			2014-03-14	2014-03-14 11:30:00		160		100					FALSE	FALSE	FALSE	TRUE	TRUE	FALSE	FALSE	FALSE	FALSE	FALSE	FALSE	FALSE	463	1	Autres diagnostics	2014-03-14	Traitement médico-chirurgical	FALSE	FALSE	TRUE	FALSE	FALSE	FALSE	TRUE	FALSE	TRUE	FALSE	FALSE	TRUE	FALSE	FALSE
Maternité de Kintambo	Quartiers des anciennes cités	2015-02-07	Quartiers résidentiels	32		Patiente venue d'elle même			2014-02-27	2014-02-27 09:00:00		140	1	90	0		0		FALSE	FALSE	FALSE	FALSE	TRUE	FALSE	FALSE	FALSE	TRUE	FALSE	FALSE	FALSE	464	1	Autres diagnostics	2014-02-28	Traitement médico-chirurgical	TRUE	FALSE	FALSE	FALSE	FALSE	FALSE	TRUE	FALSE	TRUE	FALSE	FALSE	TRUE	FALSE	FALSE
Clinique de la Mongala	Quartiers résidentiels	2015-03-16	Quartiers des cités planifiées	32		Patiente venue d'elle même			2014-10-16										FALSE	FALSE	FALSE	FALSE	FALSE	FALSE	FALSE	FALSE	FALSE	FALSE	FALSE	TRUE	833	1	Autres diagnostics	2014-10-16	Traitement médico-chirurgical	TRUE	FALSE	FALSE	FALSE	FALSE	FALSE	FALSE	FALSE	FALSE	TRUE	FALSE	TRUE	FALSE	FALSE
Clinique de la Mongala	Quartiers résidentiels	2015-03-16	Quartiers excentriques et d'extension	24		Patiente venue d'elle même			2014-10-20										FALSE	TRUE	FALSE	FALSE	FALSE	FALSE	FALSE	FALSE	FALSE	FALSE	FALSE	FALSE	834	1	Avortement spontané	2014-10-20	Traitement médico-chirurgical	TRUE	FALSE	FALSE	FALSE	FALSE	FALSE	FALSE	FALSE	FALSE	TRUE	FALSE	TRUE	FALSE	FALSE
Clinique de la Mongala	Quartiers résidentiels	2015-03-16	Quartiers semi-ruraux			Patiente venue d'elle même			2014-10-21										FALSE	TRUE	FALSE	FALSE	FALSE	FALSE	FALSE	FALSE	FALSE	FALSE	FALSE	FALSE	835	1	Avortement spontané	2014-10-21	Traitement médico-chirurgical	TRUE	FALSE	FALSE	FALSE	FALSE	FALSE	FALSE	FALSE	FALSE	FALSE	FALSE	TRUE	FALSE	FALSE
Clinique de la Mongala	Quartiers résidentiels	2015-03-16	Quartiers des cités planifiées	29		Patiente venue d'elle même			2014-10-31										FALSE	TRUE	FALSE	FALSE	FALSE	FALSE	FALSE	FALSE	FALSE	FALSE	FALSE	FALSE	836	1	Avortement spontané	2014-10-31	Traitement médico-chirurgical	TRUE	FALSE	FALSE	FALSE	FALSE	FALSE	FALSE	FALSE	FALSE	TRUE	FALSE	TRUE	FALSE	FALSE
Clinique de la Mongala	Quartiers résidentiels	2015-03-16	Quartiers résidentiels	26		Patiente venue d'elle même			2014-12-10										FALSE	TRUE	FALSE	FALSE	FALSE	FALSE	FALSE	FALSE	FALSE	FALSE	FALSE	FALSE	837	1	Avortement spontané	2014-12-10	Traitement médico-chirurgical	TRUE	FALSE	FALSE	FALSE	FALSE	FALSE	FALSE	FALSE	FALSE	TRUE	FALSE	TRUE	FALSE	FALSE
Clinique de la Mongala	Quartiers résidentiels	2015-03-16	Quartiers résidentiels	24		Patiente venue d'elle même			2014-12-31										FALSE	TRUE	FALSE	FALSE	FALSE	FALSE	FALSE	FALSE	FALSE	FALSE	FALSE	FALSE	838	1	Avortement spontané	2014-12-31	Traitement médico-chirurgical	TRUE	FALSE	FALSE	FALSE	FALSE	FALSE	FALSE	FALSE	FALSE	TRUE	FALSE	TRUE	FALSE	FALSE
Clinique de la Mongala	Quartiers résidentiels	2015-03-16	Quartiers résidentiels	36		Patiente venue d'elle même			2014-11-07										FALSE	TRUE	FALSE	FALSE	FALSE	FALSE	FALSE	FALSE	FALSE	FALSE	FALSE	FALSE	839	1	Avortement spontané	2014-11-07	Traitement médico-chirurgical	TRUE	FALSE	FALSE	FALSE	FALSE	FALSE	FALSE	FALSE	FALSE	FALSE	FALSE	TRUE	FALSE	FALSE
Clinique de la Mongala	Quartiers résidentiels	2015-03-16	Quartiers des cités planifiées	26		Patiente venue d'elle même			2014-11-19										FALSE	FALSE	FALSE	FALSE	FALSE	FALSE	FALSE	FALSE	FALSE	FALSE	FALSE	FALSE	840	1	Autres diagnostics			FALSE	FALSE	FALSE	FALSE	FALSE	FALSE	FALSE	FALSE	FALSE	FALSE	TRUE	FALSE	FALSE	FALSE
Clinique de la Mongala	Quartiers résidentiels	2015-03-16	Quartiers des cités planifiées	26		Patiente venue d'elle même			2014-11-11										FALSE	TRUE	FALSE	FALSE	FALSE	FALSE	FALSE	FALSE	FALSE	FALSE	FALSE	FALSE	841	1	Avortement spontané		Traitement médico-chirurgical	FALSE	FALSE	FALSE	FALSE	FALSE	FALSE	FALSE	FALSE	FALSE	FALSE	FALSE	FALSE	FALSE	FALSE
Clinique de la Mongala	Quartiers résidentiels	2015-03-16	Quartiers semi-ruraux	35		Patiente venue d'elle même			2014-11-14										FALSE	TRUE	FALSE	FALSE	FALSE	FALSE	FALSE	FALSE	FALSE	FALSE	FALSE	FALSE	842	1	Avortement spontané	2014-11-14	Traitement médico-chirurgical	TRUE	FALSE	FALSE	FALSE	FALSE	FALSE	FALSE	FALSE	FALSE	FALSE	FALSE	TRUE	FALSE	FALSE
Clinique de la Mongala	Quartiers résidentiels	2015-03-16	Quartiers semi-ruraux	27		Patiente venue d'elle même			2014-11-16										FALSE	TRUE	FALSE	FALSE	FALSE	FALSE	FALSE	FALSE	FALSE	FALSE	FALSE	FALSE	843	1	Avortement spontané	2014-11-16	Traitement médico-chirurgical	TRUE	FALSE	FALSE	FALSE	FALSE	FALSE	FALSE	FALSE	FALSE	FALSE	FALSE	TRUE	FALSE	FALSE
Clinique de la Mongala	Quartiers résidentiels	2015-03-16	Quartiers semi-ruraux	25		Patiente venue d'elle même			2014-11-21										TRUE	FALSE	FALSE	FALSE	FALSE	FALSE	FALSE	FALSE	FALSE	FALSE	FALSE	FALSE	844	1	Complication d'avortement provoqué	2014-11-21	Traitement médico-chirurgical	TRUE	FALSE	FALSE	FALSE	FALSE	FALSE	FALSE	FALSE	FALSE	TRUE	FALSE	TRUE	FALSE	FALSE
Clinique de la Mongala	Quartiers résidentiels	2015-03-16	Quartiers des cités planifiées	30		Patiente venue d'elle même			2014-09-29										TRUE	FALSE	FALSE	FALSE	FALSE	FALSE	FALSE	FALSE	FALSE	FALSE	FALSE	FALSE	845	1	Complication d'avortement provoqué	2014-09-29	Traitement médico-chirurgical	TRUE	FALSE	FALSE	FALSE	FALSE	FALSE	FALSE	FALSE	FALSE	FALSE	FALSE	TRUE	FALSE	FALSE
Clinique de la Mongala	Quartiers résidentiels	2015-03-16	Quartiers des cités planifiées	35		Patiente venue d'elle même			2014-09-26										FALSE	TRUE	FALSE	FALSE	FALSE	FALSE	FALSE	FALSE	FALSE	FALSE	FALSE	FALSE	846	1	Avortement spontané			FALSE	FALSE	FALSE	FALSE	FALSE	FALSE	FALSE	FALSE	FALSE	FALSE	FALSE	FALSE	FALSE	FALSE
Clinique de la Mongala	Quartiers résidentiels	2015-03-16	Quartiers des anciennes cités	33		Patiente venue d'elle même			2014-09-12										FALSE	TRUE	FALSE	FALSE	FALSE	FALSE	FALSE	FALSE	FALSE	FALSE	FALSE	FALSE	847	1	Avortement spontané	2014-09-12		FALSE	FALSE	FALSE	FALSE	FALSE	FALSE	FALSE	FALSE	FALSE	FALSE	FALSE	FALSE	FALSE	FALSE
Clinique de la Mongala	Quartiers résidentiels	2015-03-16	Quartiers semi-ruraux	24		Patiente venue d'elle même			2014-09-12										FALSE	TRUE	FALSE	FALSE	FALSE	FALSE	FALSE	FALSE	FALSE	FALSE	FALSE	FALSE	848	1	Avortement spontané	2014-09-12		TRUE	FALSE	FALSE	FALSE	FALSE	FALSE	FALSE	FALSE	FALSE	FALSE	FALSE	TRUE	FALSE	FALSE
Clinique de la Mongala	Quartiers résidentiels	2015-03-16	Quartiers résidentiels	25		Patiente venue d'elle même			2014-09-11										TRUE	FALSE	FALSE	FALSE	FALSE	FALSE	FALSE	FALSE	FALSE	FALSE	FALSE	FALSE	849	1	Complication d'avortement provoqué	2014-09-11	Traitement médico-chirurgical	TRUE	FALSE	FALSE	FALSE	FALSE	FALSE	FALSE	FALSE	FALSE	FALSE	FALSE	TRUE	FALSE	FALSE
Clinique de la Mongala	Quartiers résidentiels	2015-03-16	Quartiers résidentiels	27		Patiente venue d'elle même			2014-09-10										TRUE	FALSE	FALSE	FALSE	FALSE	FALSE	FALSE	FALSE	FALSE	FALSE	FALSE	FALSE	850	1	Complication d'avortement provoqué	2014-09-10	Traitement médico-chirurgical	TRUE	FALSE	FALSE	FALSE	FALSE	FALSE	FALSE	FALSE	FALSE	FALSE	FALSE	TRUE	FALSE	FALSE
Clinique de la Mongala	Quartiers résidentiels	2015-03-16	Quartiers résidentiels	29		Patiente venue d'elle même			2014-09-07										FALSE	TRUE	FALSE	FALSE	FALSE	FALSE	FALSE	FALSE	FALSE	FALSE	FALSE	FALSE	851	1	Avortement spontané			FALSE	FALSE	FALSE	FALSE	FALSE	FALSE	FALSE	FALSE	FALSE	FALSE	FALSE	FALSE	FALSE	FALSE
Clinique de la Mongala	Quartiers résidentiels	2015-03-16	Quartiers résidentiels	27		Patiente venue d'elle même			2014-09-07										FALSE	TRUE	FALSE	FALSE	FALSE	FALSE	FALSE	FALSE	FALSE	FALSE	FALSE	FALSE	852	1	Avortement spontané	2014-09-07	Traitement médico-chirurgical	TRUE	FALSE	FALSE	FALSE	FALSE	FALSE	FALSE	FALSE	FALSE	FALSE	FALSE	TRUE	FALSE	FALSE
Clinique de la Mongala	Quartiers résidentiels	2015-03-16	Quartiers des cités planifiées	34		Patiente venue d'elle même			2014-09-05										FALSE	TRUE	FALSE	FALSE	FALSE	FALSE	FALSE	FALSE	FALSE	FALSE	FALSE	FALSE	853	1	Avortement spontané	2014-09-05	Traitement médical	TRUE	FALSE	FALSE	FALSE	FALSE	FALSE	TRUE	FALSE	FALSE	FALSE	FALSE	TRUE	FALSE	FALSE
Clinique de la Mongala	Quartiers résidentiels	2015-03-16	Quartiers excentriques et d'extension	27		Patiente venue d'elle même			2014-09-02										FALSE	TRUE	FALSE	FALSE	FALSE	FALSE	FALSE	FALSE	FALSE	FALSE	FALSE	FALSE	854	1	Avortement spontané	2014-09-02	Traitement médico-chirurgical	TRUE	FALSE	FALSE	FALSE	FALSE	FALSE	FALSE	FALSE	FALSE	FALSE	FALSE	TRUE	FALSE	FALSE
Clinique de la Mongala	Quartiers résidentiels	2015-03-13	Quartiers des anciennes cités	32		Patiente venue d'elle même			2014-08-12										FALSE	TRUE	FALSE	FALSE	FALSE	FALSE	FALSE	FALSE	FALSE	FALSE	FALSE	FALSE	855	1	Avortement spontané	2014-08-12	Traitement médical	TRUE	FALSE	FALSE	FALSE	FALSE	FALSE	TRUE	FALSE	FALSE	FALSE	FALSE	TRUE	FALSE	FALSE
Clinique de la Mongala	Quartiers résidentiels	2015-03-13	Quartiers résidentiels	31		Patiente venue d'elle même			2014-08-17										TRUE	FALSE	FALSE	FALSE	FALSE	FALSE	FALSE	FALSE	FALSE	FALSE	FALSE	FALSE	856	1	Complication d'avortement provoqué	2014-08-17	Traitement médico-chirurgical	TRUE	FALSE	FALSE	FALSE	FALSE	FALSE	FALSE	FALSE	FALSE	FALSE	FALSE	TRUE	FALSE	FALSE
Clinique de la Mongala	Quartiers résidentiels	2015-03-13	Quartiers des cités planifiées	36		Patiente venue d'elle même			2014-08-18										FALSE	TRUE	FALSE	FALSE	FALSE	FALSE	FALSE	FALSE	FALSE	FALSE	FALSE	FALSE	857	1	Avortement spontané	2014-08-18	Traitement médical	TRUE	FALSE	FALSE	FALSE	FALSE	FALSE	TRUE	FALSE	FALSE	FALSE	FALSE	TRUE	FALSE	FALSE
Clinique de la Mongala	Quartiers résidentiels	2015-03-13				Patiente venue d'elle même			2014-08-28										FALSE	TRUE	FALSE	FALSE	FALSE	FALSE	FALSE	FALSE	FALSE	FALSE	FALSE	FALSE	858	1	Avortement spontané	2014-08-28	Traitement médical	TRUE	FALSE	FALSE	FALSE	FALSE	FALSE	TRUE	FALSE	FALSE	FALSE	FALSE	TRUE	FALSE	FALSE
Clinique de la Mongala	Quartiers résidentiels	2015-03-13	Quartiers semi-ruraux			Patiente venue d'elle même			2014-08-28										FALSE	TRUE	FALSE	FALSE	FALSE	FALSE	FALSE	FALSE	FALSE	FALSE	FALSE	FALSE	859	1	Avortement spontané	2014-08-28	Traitement médico-chirurgical	TRUE	FALSE	FALSE	FALSE	FALSE	FALSE	FALSE	FALSE	FALSE	FALSE	FALSE	TRUE	FALSE	FALSE
Clinique de la Mongala	Quartiers résidentiels	2015-03-13	Quartiers des cités planifiées	34		Patiente venue d'elle même			2014-08-30										TRUE	FALSE	FALSE	FALSE	FALSE	FALSE	FALSE	FALSE	FALSE	FALSE	FALSE	FALSE	860	1	Complication d'avortement provoqué	2014-08-30	Traitement médico-chirurgical	TRUE	FALSE	FALSE	FALSE	FALSE	FALSE	FALSE	FALSE	FALSE	FALSE	FALSE	TRUE	FALSE	FALSE
Clinique de la Mongala	Quartiers résidentiels	2015-03-13	Quartiers des anciennes cités	33		Patiente venue d'elle même			2014-07-31										TRUE	FALSE	FALSE	FALSE	FALSE	FALSE	FALSE	FALSE	FALSE	FALSE	FALSE	FALSE	861	1	Complication d'avortement provoqué	2014-07-31	Traitement médical	TRUE	FALSE	FALSE	FALSE	FALSE	FALSE	TRUE	FALSE	FALSE	FALSE	FALSE	TRUE	FALSE	FALSE
Clinique de la Mongala	Quartiers résidentiels	2015-03-13	Quartiers résidentiels	26		Patiente venue d'elle même			2014-07-24										TRUE	FALSE	FALSE	FALSE	FALSE	FALSE	FALSE	FALSE	FALSE	FALSE	FALSE	FALSE	862	1	Complication d'avortement provoqué	2014-07-24	Traitement médical	TRUE	FALSE	FALSE	FALSE	FALSE	FALSE	TRUE	FALSE	FALSE	FALSE	FALSE	TRUE	FALSE	FALSE
Clinique de la Mongala	Quartiers résidentiels	2015-03-13	Quartiers résidentiels	25		Patiente venue d'elle même			2014-07-23										FALSE	TRUE	FALSE	FALSE	FALSE	FALSE	FALSE	FALSE	FALSE	FALSE	FALSE	FALSE	863	1	Avortement spontané	2014-07-23	Traitement médical	TRUE	FALSE	FALSE	FALSE	FALSE	FALSE	TRUE	FALSE	FALSE	FALSE	FALSE	TRUE	FALSE	FALSE
Clinique de la Mongala	Quartiers résidentiels	2015-03-13	Quartiers excentriques et d'extension	39		Patiente venue d'elle même			2014-07-12										FALSE	TRUE	FALSE	FALSE	FALSE	FALSE	FALSE	FALSE	FALSE	FALSE	FALSE	FALSE	864	1	Avortement spontané	2014-07-12	Traitement médical	TRUE	FALSE	FALSE	FALSE	FALSE	FALSE	TRUE	FALSE	FALSE	FALSE	FALSE	TRUE	FALSE	FALSE
Clinique de la Mongala	Quartiers résidentiels	2015-03-13	Quartiers résidentiels	39		Patiente venue d'elle même			2014-07-22										FALSE	TRUE	FALSE	FALSE	FALSE	FALSE	FALSE	FALSE	FALSE	FALSE	FALSE	FALSE	865	1	Avortement spontané	2014-07-22	Traitement médico-chirurgical	TRUE	FALSE	FALSE	FALSE	FALSE	FALSE	FALSE	FALSE	FALSE	FALSE	FALSE	TRUE	FALSE	FALSE
Clinique de la Mongala	Quartiers résidentiels	2015-03-13	Quartiers résidentiels	34		Patiente venue d'elle même			2014-07-08										FALSE	TRUE	FALSE	FALSE	FALSE	FALSE	FALSE	FALSE	FALSE	FALSE	FALSE	FALSE	866	1	Avortement spontané	2014-07-08	Traitement médico-chirurgical	TRUE	FALSE	FALSE	FALSE	FALSE	FALSE	FALSE	FALSE	FALSE	FALSE	FALSE	TRUE	FALSE	FALSE
Clinique de la Mongala	Quartiers résidentiels	2015-03-13	Quartiers excentriques et d'extension	39		Patiente venue d'elle même			2014-07-07										FALSE	TRUE	FALSE	FALSE	FALSE	FALSE	FALSE	FALSE	FALSE	FALSE	FALSE	FALSE	867	1	Avortement spontané	2014-07-07	Traitement médico-chirurgical	TRUE	FALSE	FALSE	FALSE	FALSE	FALSE	FALSE	FALSE	FALSE	FALSE	FALSE	TRUE	FALSE	FALSE
Clinique de la Mongala	Quartiers résidentiels	2015-03-13	Quartiers excentriques et d'extension	36		Patiente venue d'elle même			2014-06-27										FALSE	TRUE	FALSE	FALSE	FALSE	FALSE	FALSE	FALSE	FALSE	FALSE	FALSE	FALSE	868	1	Avortement spontané	2014-06-27	Traitement médico-chirurgical	TRUE	FALSE	FALSE	FALSE	FALSE	FALSE	FALSE	FALSE	FALSE	FALSE	FALSE	TRUE	FALSE	FALSE
Clinique de la Mongala	Quartiers résidentiels	2015-03-13	Quartiers des cités planifiées	36		Patiente venue d'elle même			2014-06-24										FALSE	TRUE	FALSE	FALSE	FALSE	FALSE	FALSE	FALSE	FALSE	FALSE	FALSE	FALSE	869	1	Avortement spontané	2014-06-24	Traitement médico-chirurgical	TRUE	FALSE	FALSE	FALSE	FALSE	FALSE	FALSE	FALSE	FALSE	FALSE	FALSE	TRUE	FALSE	FALSE
Clinique de la Mongala	Quartiers résidentiels	2015-03-13	Quartiers résidentiels	22		Patiente venue d'elle même			2014-06-20										FALSE	TRUE	FALSE	FALSE	FALSE	FALSE	FALSE	FALSE	FALSE	FALSE	FALSE	FALSE	870	1	Avortement spontané	2014-06-20	Traitement médico-chirurgical	TRUE	FALSE	FALSE	FALSE	FALSE	FALSE	FALSE	FALSE	FALSE	FALSE	FALSE	TRUE	FALSE	FALSE
Clinique de la Mongala	Quartiers résidentiels	2015-03-13	Quartiers résidentiels	27		Patiente venue d'elle même			2014-06-20										FALSE	TRUE	FALSE	FALSE	FALSE	FALSE	FALSE	FALSE	FALSE	FALSE	FALSE	FALSE	871	1	Avortement spontané	2014-06-20	Traitement médico-chirurgical	TRUE	FALSE	FALSE	FALSE	FALSE	FALSE	FALSE	FALSE	FALSE	FALSE	FALSE	TRUE	FALSE	FALSE
Clinique de la Mongala	Quartiers résidentiels	2015-03-13	Quartiers excentriques et d'extension	41		Patiente venue d'elle même			2014-06-16										FALSE	TRUE	FALSE	FALSE	FALSE	FALSE	FALSE	FALSE	FALSE	FALSE	FALSE	FALSE	872	1	Avortement spontané	2014-06-16	Traitement médico-chirurgical	TRUE	FALSE	FALSE	FALSE	FALSE	FALSE	FALSE	FALSE	FALSE	FALSE	FALSE	TRUE	FALSE	FALSE
Clinique de la Mongala	Quartiers résidentiels	2015-03-13	Quartiers résidentiels	22		Patiente venue d'elle même			2014-06-12										FALSE	TRUE	FALSE	FALSE	FALSE	FALSE	FALSE	FALSE	FALSE	FALSE	FALSE	FALSE	873	1	Avortement spontané	2014-06-12	Traitement médico-chirurgical	TRUE	FALSE	FALSE	FALSE	FALSE	FALSE	FALSE	FALSE	FALSE	FALSE	FALSE	TRUE	FALSE	FALSE
Clinique de la Mongala	Quartiers résidentiels	2015-03-13		44		Patiente venue d'elle même			2014-06-09										FALSE	TRUE	FALSE	FALSE	FALSE	FALSE	FALSE	FALSE	FALSE	FALSE	FALSE	FALSE	874	1	Avortement spontané	2014-06-09	Traitement médico-chirurgical	TRUE	FALSE	FALSE	FALSE	FALSE	FALSE	FALSE	FALSE	FALSE	FALSE	FALSE	TRUE	FALSE	FALSE
Clinique de la Mongala	Quartiers résidentiels	2015-03-13				Patiente venue d'elle même			2014-06-08										TRUE	FALSE	FALSE	FALSE	FALSE	FALSE	FALSE	FALSE	FALSE	FALSE	FALSE	FALSE	875	1	Complication d'avortement provoqué	2014-06-08	Traitement médico-chirurgical	TRUE	FALSE	FALSE	FALSE	FALSE	FALSE	FALSE	FALSE	FALSE	FALSE	FALSE	TRUE	FALSE	FALSE
Clinique de la Mongala	Quartiers résidentiels	2015-03-13	Quartiers résidentiels	23		Patiente venue d'elle même			2014-06-08										TRUE	FALSE	FALSE	FALSE	FALSE	FALSE	FALSE	FALSE	FALSE	FALSE	FALSE	FALSE	876	1	Complication d'avortement provoqué	2014-06-08	Traitement médico-chirurgical	TRUE	FALSE	FALSE	FALSE	FALSE	FALSE	FALSE	FALSE	FALSE	FALSE	FALSE	TRUE	FALSE	FALSE
Clinique de la Mongala	Quartiers résidentiels	2015-03-12	Quartiers excentriques et d'extension	41		Patiente venue d'elle même			2014-05-29										FALSE	TRUE	FALSE	FALSE	FALSE	FALSE	FALSE	FALSE	FALSE	FALSE	FALSE	FALSE	877	1	Avortement spontané	2014-05-29	Traitement médico-chirurgical	TRUE	FALSE	FALSE	FALSE	FALSE	FALSE	FALSE	FALSE	FALSE	FALSE	FALSE	TRUE	FALSE	FALSE
Clinique de la Mongala	Quartiers résidentiels	2015-03-12	Quartiers des anciennes cités	28		Patiente venue d'elle même			2014-05-20										TRUE	FALSE	FALSE	FALSE	FALSE	FALSE	FALSE	FALSE	FALSE	FALSE	FALSE	FALSE	878	1	Complication d'avortement provoqué	2014-05-20	Traitement médico-chirurgical	FALSE	FALSE	FALSE	FALSE	FALSE	FALSE	FALSE	FALSE	FALSE	FALSE	FALSE	FALSE	FALSE	FALSE
Clinique de la Mongala	Quartiers résidentiels	2015-03-12	Quartiers excentriques et d'extension	21		Patiente venue d'elle même			2014-05-17										FALSE	TRUE	FALSE	FALSE	FALSE	FALSE	FALSE	FALSE	FALSE	FALSE	FALSE	FALSE	879	1	Avortement spontané	2014-05-17	Traitement médico-chirurgical	TRUE	FALSE	FALSE	FALSE	FALSE	FALSE	FALSE	FALSE	FALSE	FALSE	FALSE	TRUE	FALSE	FALSE
Clinique de la Mongala	Quartiers résidentiels	2015-03-12	Quartiers résidentiels	32		Patiente venue d'elle même			2014-05-15										FALSE	TRUE	FALSE	FALSE	FALSE	FALSE	FALSE	FALSE	FALSE	FALSE	FALSE	FALSE	880	1	Avortement spontané	2014-05-15	Traitement médico-chirurgical	TRUE	FALSE	FALSE	FALSE	FALSE	FALSE	FALSE	FALSE	FALSE	FALSE	FALSE	TRUE	FALSE	FALSE
Clinique de la Mongala	Quartiers résidentiels	2015-03-12	Quartiers semi-ruraux	39		Patiente venue d'elle même			2014-05-09										FALSE	TRUE	FALSE	FALSE	FALSE	FALSE	FALSE	FALSE	FALSE	FALSE	FALSE	FALSE	881	1	Avortement spontané		Traitement médico-chirurgical	TRUE	FALSE	FALSE	FALSE	FALSE	FALSE	FALSE	FALSE	FALSE	FALSE	FALSE	TRUE	FALSE	FALSE
Clinique de la Mongala	Quartiers résidentiels	2015-03-12	Quartiers semi-ruraux	36		Patiente venue d'elle même			2014-05-08										FALSE	TRUE	FALSE	FALSE	FALSE	FALSE	FALSE	FALSE	FALSE	FALSE	FALSE	FALSE	882	1	Avortement spontané	2014-05-08	Traitement médico-chirurgical	TRUE	FALSE	FALSE	FALSE	FALSE	FALSE	FALSE	FALSE	FALSE	FALSE	FALSE	TRUE	FALSE	FALSE
Clinique de la Mongala	Quartiers résidentiels	2015-03-12	Quartiers des cités planifiées	41		Patiente venue d'elle même			2014-05-07										FALSE	TRUE	FALSE	FALSE	FALSE	FALSE	FALSE	FALSE	FALSE	FALSE	FALSE	FALSE	883	1	Avortement spontané	2014-05-07	Traitement médico-chirurgical	TRUE	FALSE	FALSE	FALSE	FALSE	FALSE	FALSE	FALSE	FALSE	FALSE	FALSE	TRUE	FALSE	FALSE
Clinique de la Mongala	Quartiers résidentiels	2015-03-12	Quartiers résidentiels	36		Patiente venue d'elle même			2014-05-05										TRUE	FALSE	FALSE	FALSE	FALSE	FALSE	FALSE	FALSE	FALSE	FALSE	FALSE	FALSE	884	1	Complication d'avortement provoqué	2014-05-05	Traitement médico-chirurgical	TRUE	FALSE	FALSE	FALSE	FALSE	FALSE	FALSE	FALSE	FALSE	FALSE	FALSE	TRUE	FALSE	FALSE
Clinique de la Mongala	Quartiers résidentiels	2015-03-12	Quartiers des cités planifiées	32		Patiente venue d'elle même			2014-05-01										FALSE	TRUE	FALSE	FALSE	FALSE	FALSE	FALSE	FALSE	FALSE	FALSE	FALSE	FALSE	885	1	Avortement spontané	2014-05-01	Traitement médico-chirurgical	TRUE	FALSE	FALSE	FALSE	FALSE	FALSE	FALSE	FALSE	FALSE	FALSE	FALSE	TRUE	FALSE	FALSE
Clinique de la Mongala	Quartiers résidentiels	2015-03-12	Quartiers des cités planifiées	23		Patiente venue d'elle même			2014-05-05										TRUE	FALSE	FALSE	FALSE	FALSE	FALSE	FALSE	FALSE	FALSE	FALSE	FALSE	FALSE	886	1	Complication d'avortement provoqué	2014-05-05	Traitement médico-chirurgical	TRUE	FALSE	FALSE	FALSE	FALSE	FALSE	FALSE	FALSE	FALSE	FALSE	FALSE	TRUE	FALSE	FALSE
Clinique de la Mongala	Quartiers résidentiels	2015-03-12	Quartiers des cités planifiées	32		Patiente venue d'elle même			2014-05-03										TRUE	FALSE	FALSE	FALSE	FALSE	FALSE	FALSE	FALSE	FALSE	FALSE	FALSE	FALSE	887	1	Complication d'avortement provoqué	2014-05-03	Traitement médico-chirurgical	TRUE	FALSE	FALSE	FALSE	FALSE	FALSE	FALSE	FALSE	FALSE	FALSE	FALSE	TRUE	FALSE	FALSE
Clinique de la Mongala	Quartiers résidentiels	2015-03-12	Quartiers des cités planifiées	31		Patiente venue d'elle même			2014-05-01										FALSE	TRUE	FALSE	FALSE	FALSE	FALSE	FALSE	FALSE	FALSE	FALSE	FALSE	FALSE	888	1	Avortement spontané	2014-05-01	Traitement médico-chirurgical	TRUE	FALSE	FALSE	FALSE	FALSE	FALSE	FALSE	FALSE	FALSE	FALSE	FALSE	TRUE	FALSE	FALSE
Clinique de la Mongala	Quartiers résidentiels	2015-03-12	Quartiers résidentiels	43		Patiente venue d'elle même			2014-04-24										FALSE	TRUE	FALSE	FALSE	FALSE	FALSE	FALSE	FALSE	FALSE	FALSE	FALSE	FALSE	889	1	Avortement spontané	2014-04-24	Traitement médico-chirurgical	TRUE	FALSE	FALSE	FALSE	FALSE	FALSE	FALSE	FALSE	FALSE	FALSE	FALSE	TRUE	FALSE	FALSE
Clinique de la Mongala	Quartiers résidentiels	2015-03-12	Quartiers des cités planifiées	26		Patiente venue d'elle même			2014-04-22										FALSE	FALSE	FALSE	FALSE	TRUE	FALSE	FALSE	FALSE	FALSE	FALSE	FALSE	FALSE	890	1	Autres diagnostics	2014-04-22	Traitement médical	TRUE	FALSE	FALSE	FALSE	FALSE	FALSE	FALSE	TRUE	FALSE	FALSE	FALSE	TRUE	FALSE	FALSE
Clinique de la Mongala	Quartiers résidentiels	2015-03-12	Quartiers résidentiels			Patiente venue d'elle même			2014-04-02										FALSE	TRUE	FALSE	FALSE	FALSE	FALSE	FALSE	FALSE	FALSE	FALSE	FALSE	FALSE	891	1	Avortement spontané	2014-04-02	Traitement médico-chirurgical	TRUE	FALSE	FALSE	FALSE	FALSE	FALSE	FALSE	FALSE	FALSE	FALSE	FALSE	TRUE	FALSE	FALSE
Clinique de la Mongala	Quartiers résidentiels	2015-03-12	Quartiers des anciennes cités	30		Patiente venue d'elle même			2014-03-31										FALSE	TRUE	FALSE	FALSE	FALSE	FALSE	FALSE	FALSE	FALSE	FALSE	FALSE	FALSE	892	1	Avortement spontané		Traitement médico-chirurgical	TRUE	FALSE	FALSE	FALSE	FALSE	FALSE	FALSE	FALSE	FALSE	FALSE	FALSE	TRUE	FALSE	FALSE
Clinique de la Mongala	Quartiers résidentiels	2015-03-12	Quartiers des cités planifiées	30		Patiente venue d'elle même			2014-03-31										FALSE	TRUE	FALSE	FALSE	FALSE	FALSE	FALSE	FALSE	FALSE	FALSE	FALSE	FALSE	893	1	Avortement spontané			FALSE	FALSE	FALSE	FALSE	FALSE	FALSE	FALSE	FALSE	FALSE	FALSE	FALSE	FALSE	FALSE	FALSE
Clinique de la Mongala	Quartiers résidentiels	2015-03-12	Quartiers des cités planifiées	30		Patiente venue d'elle même			2014-03-30										FALSE	TRUE	FALSE	FALSE	FALSE	FALSE	FALSE	FALSE	FALSE	FALSE	FALSE	FALSE	894	1	Avortement spontané	2014-03-30	Traitement médico-chirurgical	TRUE	FALSE	FALSE	FALSE	FALSE	FALSE	FALSE	FALSE	FALSE	FALSE	FALSE	TRUE	FALSE	FALSE
Clinique de la Mongala	Quartiers résidentiels	2015-03-12	Quartiers semi-ruraux	19		Patiente venue d'elle même			2014-03-26										TRUE	FALSE	FALSE	FALSE	FALSE	FALSE	FALSE	FALSE	FALSE	FALSE	FALSE	FALSE	895	1	Complication d'avortement provoqué	2014-03-26	Traitement médico-chirurgical	TRUE	FALSE	FALSE	FALSE	FALSE	FALSE	FALSE	FALSE	FALSE	FALSE	FALSE	TRUE	FALSE	FALSE
Clinique de la Mongala	Quartiers résidentiels	2015-03-12	Quartiers excentriques et d'extension	21		Patiente venue d'elle même			2014-03-13										TRUE	FALSE	FALSE	FALSE	FALSE	FALSE	FALSE	FALSE	FALSE	FALSE	FALSE	FALSE	896	1	Complication d'avortement provoqué	2014-03-13	Traitement médico-chirurgical	TRUE	FALSE	FALSE	FALSE	FALSE	FALSE	FALSE	FALSE	FALSE	FALSE	FALSE	TRUE	FALSE	FALSE
Clinique de la Mongala	Quartiers résidentiels	2015-03-12				Patiente venue d'elle même			2014-03-13										FALSE	TRUE	FALSE	FALSE	FALSE	FALSE	FALSE	FALSE	FALSE	FALSE	FALSE	FALSE	897	1	Avortement spontané	2014-03-13	Traitement médical	TRUE	FALSE	FALSE	FALSE	FALSE	FALSE	TRUE	FALSE	FALSE	FALSE	FALSE	FALSE	FALSE	FALSE
Clinique de la Mongala	Quartiers résidentiels	2015-03-12	Quartiers semi-ruraux	30		Patiente venue d'elle même			2014-03-11										FALSE	TRUE	FALSE	FALSE	FALSE	FALSE	FALSE	FALSE	FALSE	FALSE	FALSE	FALSE	898	1	Avortement spontané	2014-03-11	Traitement médical	TRUE	FALSE	FALSE	FALSE	FALSE	FALSE	FALSE	FALSE	FALSE	FALSE	FALSE	TRUE	FALSE	FALSE
Clinique de la Mongala	Quartiers résidentiels	2015-03-12	Quartiers résidentiels	32		Patiente venue d'elle même			2014-03-08										TRUE	FALSE	FALSE	FALSE	FALSE	FALSE	FALSE	FALSE	FALSE	FALSE	FALSE	FALSE	899	1	Complication d'avortement provoqué	2014-03-08	Traitement médical	TRUE	FALSE	FALSE	FALSE	FALSE	FALSE	TRUE	FALSE	FALSE	FALSE	FALSE	TRUE	FALSE	FALSE
Clinique de la Mongala	Quartiers résidentiels	2015-03-12	Quartiers résidentiels	25		Patiente venue d'elle même			2014-03-01										TRUE	FALSE	FALSE	FALSE	FALSE	FALSE	FALSE	FALSE	FALSE	FALSE	FALSE	FALSE	900	1	Complication d'avortement provoqué	2014-03-01	Traitement médico-chirurgical	TRUE	FALSE	FALSE	FALSE	FALSE	FALSE	FALSE	FALSE	FALSE	FALSE	FALSE	TRUE	FALSE	FALSE
Clinique St Gabriel	Quartiers des cités planifiées	2015-04-17	Quartiers des cités planifiées	36		Patiente venue d'elle même			2014-12-01	2014-12-01 09:50:00		150		90					FALSE	FALSE	FALSE	FALSE	TRUE	FALSE	TRUE	FALSE	FALSE	FALSE	FALSE	FALSE	901	1	Autres diagnostics	2014-12-01	Traitement médical	FALSE	FALSE	FALSE	FALSE	TRUE	FALSE	FALSE	FALSE	FALSE	TRUE	FALSE	TRUE	FALSE	FALSE
Clinique St Gabriel	Quartiers des cités planifiées	2015-03-19	Quartiers des cités planifiées	28		Patiente venue d'elle même			2014-03-29			90	3	60	2		0		FALSE	FALSE	FALSE	FALSE	FALSE	FALSE	FALSE	FALSE	FALSE	FALSE	FALSE	FALSE	902	1	Autres diagnostics	2014-03-29	Traitement médical	TRUE	FALSE	FALSE	TRUE	FALSE	FALSE	FALSE	FALSE	FALSE	TRUE	FALSE	TRUE	FALSE	TRUE
Clinique St Gabriel	Quartiers des cités planifiées	2015-03-19	Quartiers excentriques et d'extension	37		Patiente venue d'elle même			2014-04-15			140	7	90	4		2		FALSE	FALSE	FALSE	FALSE	FALSE	FALSE	FALSE	FALSE	FALSE	FALSE	TRUE	FALSE	903	1	Autres diagnostics		Traitement médico-chirurgical	TRUE	FALSE	FALSE	TRUE	FALSE	FALSE	FALSE	FALSE	FALSE	FALSE	FALSE	TRUE	FALSE	FALSE
Clinique St Gabriel	Quartiers des cités planifiées	2015-03-19		28		Patiente venue d'elle même			2014-06-07										FALSE	TRUE	FALSE	FALSE	FALSE	FALSE	FALSE	FALSE	FALSE	FALSE	FALSE	FALSE	904	1	Avortement spontané	2014-06-07	Traitement médical	TRUE	FALSE	FALSE	TRUE	FALSE	FALSE	TRUE	FALSE	FALSE	FALSE	FALSE	TRUE	FALSE	FALSE
Clinique St Gabriel	Quartiers des cités planifiées	2015-03-19	Quartiers des cités planifiées	40		Patiente venue d'elle même			2014-09-29			140	3	70	1		1		FALSE	FALSE	FALSE	FALSE	FALSE	FALSE	FALSE	FALSE	FALSE	FALSE	TRUE	FALSE	905	1	Autres diagnostics	2014-09-29	Traitement médical	FALSE	FALSE	FALSE	FALSE	FALSE	FALSE	FALSE	FALSE	FALSE	FALSE	FALSE	TRUE	FALSE	FALSE
Clinique St Gabriel	Quartiers des cités planifiées	2015-03-19	Quartiers des cités planifiées	35		Patiente venue d'elle même			2014-01-14				3		1		1		FALSE	FALSE	FALSE	FALSE	FALSE	FALSE	FALSE	FALSE	FALSE	FALSE	FALSE	TRUE	906	1	Autres diagnostics	2014-01-14		FALSE	FALSE	FALSE	FALSE	FALSE	FALSE	FALSE	FALSE	FALSE	FALSE	FALSE	FALSE	FALSE	FALSE
Clinique St Gabriel	Quartiers des cités planifiées	2015-03-19	Quartiers des cités planifiées	22		Patiente venue d'elle même			2014-07-14			100	2	80	0		1		FALSE	FALSE	FALSE	FALSE	FALSE	FALSE	FALSE	FALSE	FALSE	FALSE	FALSE	TRUE	907	1	Autres diagnostics	2014-01-14	Traitement médico-chirurgical	FALSE	FALSE	FALSE	FALSE	FALSE	FALSE	FALSE	FALSE	FALSE	FALSE	FALSE	FALSE	FALSE	FALSE
Clinique St Gabriel	Quartiers des cités planifiées	2015-03-19	Quartiers des cités planifiées	27		Patiente venue d'elle même			2014-12-15			110	2	70	0		1		TRUE	FALSE	FALSE	FALSE	FALSE	FALSE	FALSE	FALSE	FALSE	FALSE	FALSE	FALSE	908	1	Complication d'avortement provoqué	2014-12-15	Traitement médical	FALSE	FALSE	FALSE	FALSE	FALSE	FALSE	FALSE	FALSE	FALSE	TRUE	FALSE	FALSE	FALSE	FALSE
Clinique St Gabriel	Quartiers des cités planifiées	2015-03-19	Quartiers des cités planifiées	30		Patiente venue d'elle même			2014-12-16				1		0		0		FALSE	FALSE	FALSE	FALSE	FALSE	FALSE	FALSE	FALSE	FALSE	FALSE	FALSE	FALSE	909	1	Autres diagnostics	2014-12-16	Traitement médical	FALSE	FALSE	FALSE	FALSE	FALSE	FALSE	FALSE	FALSE	FALSE	FALSE	TRUE	FALSE	FALSE	FALSE
Clinique St Gabriel	Quartiers des cités planifiées	2015-03-19	Quartiers des cités planifiées	35		Patiente venue d'elle même			2014-11-24			110	5	80	2		2		FALSE	FALSE	FALSE	FALSE	FALSE	FALSE	FALSE	FALSE	FALSE	FALSE	TRUE	FALSE	910	1	Autres diagnostics	2014-12-04	Traitement médico-chirurgical	FALSE	TRUE	TRUE	FALSE	FALSE	FALSE	TRUE	FALSE	FALSE	FALSE	FALSE	TRUE	FALSE	FALSE
Clinique St Gabriel	Quartiers des cités planifiées	2015-03-19	Quartiers des cités planifiées	22		Patiente venue d'elle même			2014-09-18										FALSE	TRUE	FALSE	FALSE	FALSE	FALSE	FALSE	FALSE	FALSE	FALSE	FALSE	FALSE	911	1	Avortement spontané	2014-09-18	Traitement médical	FALSE	FALSE	TRUE	FALSE	FALSE	FALSE	TRUE	FALSE	FALSE	FALSE	FALSE	FALSE	FALSE	FALSE
Clinique St Gabriel	Quartiers des cités planifiées	2015-03-19	Quartiers des cités planifiées	38		Patiente venue d'elle même			2014-04-07				4				1		FALSE	TRUE	FALSE	FALSE	FALSE	FALSE	FALSE	FALSE	FALSE	FALSE	FALSE	FALSE	912	1	Avortement spontané	2014-04-07	Traitement médical	FALSE	FALSE	FALSE	FALSE	FALSE	FALSE	FALSE	FALSE	FALSE	TRUE	FALSE	FALSE	FALSE	FALSE
Clinique St Gabriel	Quartiers des cités planifiées	2015-03-19	Quartiers semi-ruraux	27		Patiente venue d'elle même			2014-03-17			100	3	60	1		1		FALSE	TRUE	FALSE	FALSE	FALSE	FALSE	FALSE	FALSE	FALSE	FALSE	FALSE	FALSE	913	1	Avortement spontané	2014-03-17	Traitement médical	FALSE	FALSE	FALSE	FALSE	FALSE	FALSE	FALSE	FALSE	FALSE	TRUE	FALSE	FALSE	FALSE	FALSE
Clinique St Gabriel	Quartiers des cités planifiées	2015-03-19	Quartiers des cités planifiées	28		Patiente venue d'elle même			2014-11-28			110	2	60	1		0		FALSE	TRUE	FALSE	FALSE	FALSE	FALSE	FALSE	FALSE	FALSE	FALSE	FALSE	FALSE	914	1	Avortement spontané	2014-11-28	Traitement médical	TRUE	FALSE	FALSE	FALSE	FALSE	FALSE	FALSE	FALSE	FALSE	TRUE	FALSE	FALSE	FALSE	FALSE
Clinique St Gabriel	Quartiers des cités planifiées	2015-03-19	Quartiers des cités planifiées	40		Patiente venue d'elle même							8		3		4		FALSE	FALSE	FALSE	FALSE	FALSE	FALSE	TRUE	FALSE	FALSE	FALSE	FALSE	FALSE	915	1	Autres diagnostics			FALSE	FALSE	FALSE	FALSE	FALSE	FALSE	FALSE	FALSE	FALSE	FALSE	FALSE	FALSE	FALSE	FALSE
Clinique St Gabriel	Quartiers des cités planifiées	2015-03-19				Patiente venue d'elle même			2014-03-02	2014-03-02 01:35:00			3		2		0		TRUE	FALSE	FALSE	FALSE	FALSE	FALSE	FALSE	FALSE	FALSE	FALSE	FALSE	FALSE	916	1	Complication d'avortement provoqué		Traitement médico-chirurgical	FALSE	FALSE	TRUE	FALSE	FALSE	FALSE	TRUE	FALSE	FALSE	TRUE	FALSE	TRUE	FALSE	FALSE
Clinique St Gabriel	Quartiers des cités planifiées	2015-03-19	Quartiers des anciennes cités	33		Patiente venue d'elle même			2014-09-12	2014-09-12 14:43:00		100	2	60	0		1		FALSE	TRUE	FALSE	FALSE	FALSE	FALSE	FALSE	FALSE	FALSE	FALSE	FALSE	FALSE	917	1	Avortement spontané	2014-09-16	Traitement médical	TRUE	FALSE	FALSE	FALSE	FALSE	FALSE	FALSE	FALSE	FALSE	TRUE	FALSE	FALSE	FALSE	FALSE
Clinique St Gabriel	Quartiers des cités planifiées	2015-03-19	Quartiers des cités planifiées	23		Patiente venue d'elle même			2014-01-27										FALSE	TRUE	FALSE	FALSE	FALSE	FALSE	FALSE	FALSE	FALSE	FALSE	FALSE	FALSE	918	1	Avortement spontané	2014-01-27	Traitement médico-chirurgical	TRUE	FALSE	FALSE	FALSE	FALSE	FALSE	TRUE	FALSE	FALSE	FALSE	FALSE	FALSE	FALSE	FALSE
Clinique St Gabriel	Quartiers des cités planifiées	2015-03-19	Quartiers des cités planifiées	31		Patiente venue d'elle même			2014-02-13			100	3	70	1		1		FALSE	TRUE	FALSE	FALSE	FALSE	FALSE	FALSE	FALSE	FALSE	FALSE	FALSE	FALSE	919	1	Avortement spontané	2014-02-13	Traitement médico-chirurgical	FALSE	FALSE	TRUE	FALSE	FALSE	FALSE	TRUE	FALSE	TRUE	FALSE	FALSE	TRUE	FALSE	FALSE
Clinique St Gabriel	Quartiers des cités planifiées	2015-03-20	Quartiers excentriques et d'extension	36		Patiente venue d'elle même			2014-08-09			110		70					FALSE	TRUE	FALSE	FALSE	FALSE	FALSE	FALSE	FALSE	FALSE	FALSE	FALSE	FALSE	920	1	Avortement spontané	2014-08-09	Traitement médical	FALSE	FALSE	FALSE	FALSE	FALSE	FALSE	FALSE	FALSE	FALSE	TRUE	FALSE	FALSE	FALSE	FALSE
Clinique St Gabriel	Quartiers des cités planifiées	2015-03-20	Quartiers des cités planifiées	17		Patiente venue d'elle même			2014-04-25	2014-04-25 01:30:00			1		0		0		TRUE	FALSE	FALSE	FALSE	FALSE	FALSE	FALSE	FALSE	FALSE	FALSE	FALSE	FALSE	921	1	Complication d'avortement provoqué		Traitement médico-chirurgical	TRUE	FALSE	FALSE	TRUE	FALSE	FALSE	TRUE	FALSE	FALSE	FALSE	FALSE	TRUE	FALSE	FALSE
Clinique St Gabriel	Quartiers des cités planifiées	2015-03-20	Quartiers résidentiels	39		Patiente venue d'elle même			2014-02-18			80		60					FALSE	TRUE	FALSE	FALSE	FALSE	FALSE	FALSE	FALSE	FALSE	FALSE	FALSE	FALSE	922	1	Avortement spontané	2014-02-18	Traitement médico-chirurgical	TRUE	FALSE	FALSE	TRUE	FALSE	FALSE	TRUE	FALSE	FALSE	FALSE	FALSE	FALSE	FALSE	FALSE
Clinique St Gabriel	Quartiers des cités planifiées	2015-03-20	Quartiers des cités planifiées	38		Patiente venue d'elle même			2014-05-13			120	2	80	1		0		FALSE	TRUE	FALSE	FALSE	FALSE	FALSE	FALSE	FALSE	FALSE	FALSE	FALSE	FALSE	923	1	Avortement spontané	2014-05-13	Traitement médical	FALSE	FALSE	FALSE	FALSE	FALSE	FALSE	FALSE	FALSE	FALSE	TRUE	FALSE	FALSE	FALSE	FALSE
Clinique St Gabriel	Quartiers des cités planifiées	2015-03-20	Quartiers des cités planifiées	25		Patiente venue d'elle même			2014-02-28	2014-02-28 18:15:00		100	2	60	1		0		TRUE	FALSE	FALSE	FALSE	FALSE	FALSE	FALSE	FALSE	FALSE	FALSE	FALSE	FALSE	924	1	Complication d'avortement provoqué	2014-02-28	Traitement médico-chirurgical	FALSE	FALSE	TRUE	TRUE	FALSE	FALSE	TRUE	FALSE	FALSE	FALSE	FALSE	TRUE	FALSE	FALSE
Clinique St Gabriel	Quartiers des cités planifiées	2015-03-20	Quartiers excentriques et d'extension	37		Patiente venue d'elle même			2014-01-10			100	5	60	2		2		FALSE	TRUE	FALSE	FALSE	FALSE	FALSE	FALSE	FALSE	FALSE	FALSE	FALSE	FALSE	925	1	Avortement spontané		Traitement médico-chirurgical	FALSE	FALSE	FALSE	FALSE	FALSE	FALSE	FALSE	FALSE	FALSE	FALSE	FALSE	FALSE	FALSE	FALSE
Clinique St Gabriel	Quartiers des cités planifiées	2015-03-20	Quartiers excentriques et d'extension	23		Patiente venue d'elle même			2014-04-27				2		1		0		TRUE	FALSE	FALSE	FALSE	FALSE	FALSE	FALSE	FALSE	FALSE	FALSE	FALSE	FALSE	926	1	Complication d'avortement provoqué	2014-04-27	Traitement médico-chirurgical	TRUE	FALSE	FALSE	FALSE	FALSE	FALSE	TRUE	FALSE	TRUE	FALSE	FALSE	FALSE	FALSE	FALSE
Clinique St Gabriel	Quartiers des cités planifiées	2015-03-20		25		Patiente venue d'elle même			2014-04-12	2014-04-12 16:00:00									TRUE	FALSE	FALSE	FALSE	FALSE	FALSE	FALSE	FALSE	FALSE	FALSE	FALSE	FALSE	927	1	Complication d'avortement provoqué	2014-04-12	Traitement médico-chirurgical	TRUE	FALSE	FALSE	FALSE	FALSE	FALSE	TRUE	FALSE	TRUE	FALSE	FALSE	FALSE	FALSE	FALSE
Clinique St Gabriel	Quartiers des cités planifiées	2015-03-20	Quartiers des cités planifiées	18		Patiente venue d'elle même			2014-10-15				2		1		0		TRUE	FALSE	FALSE	FALSE	FALSE	FALSE	FALSE	FALSE	FALSE	FALSE	FALSE	FALSE	928	1	Complication d'avortement provoqué	2014-10-15	Traitement médico-chirurgical	TRUE	FALSE	FALSE	TRUE	FALSE	FALSE	TRUE	FALSE	TRUE	FALSE	FALSE	FALSE	FALSE	FALSE
Clinique St Gabriel	Quartiers des cités planifiées	2015-03-20	Quartiers des cités planifiées	23		Patiente venue d'elle même			2014-10-13			110		70					TRUE	FALSE	FALSE	FALSE	FALSE	FALSE	FALSE	FALSE	FALSE	FALSE	FALSE	FALSE	929	1	Complication d'avortement provoqué	2014-10-13	Traitement médico-chirurgical	TRUE	FALSE	FALSE	TRUE	FALSE	FALSE	TRUE	FALSE	TRUE	FALSE	FALSE	FALSE	FALSE	FALSE
Clinique St Gabriel	Quartiers des cités planifiées	2015-03-20	Quartiers excentriques et d'extension	38		Patiente venue d'elle même			2014-09-02			110	4	60	2		2		FALSE	FALSE	FALSE	FALSE	FALSE	FALSE	FALSE	FALSE	FALSE	FALSE	TRUE	FALSE	930	1	Autres diagnostics		Traitement médico-chirurgical	FALSE	FALSE	TRUE	FALSE	FALSE	FALSE	FALSE	FALSE	TRUE	FALSE	FALSE	FALSE	FALSE	FALSE
Clinique St Gabriel	Quartiers des cités planifiées	2015-03-20	Quartiers des cités planifiées	19		Patiente venue d'elle même			2014-10-10	2014-10-10 04:30:00			1		0		0		TRUE	FALSE	FALSE	FALSE	FALSE	FALSE	FALSE	FALSE	FALSE	FALSE	FALSE	FALSE	931	1	Complication d'avortement provoqué		Traitement médico-chirurgical	TRUE	FALSE	FALSE	TRUE	FALSE	FALSE	TRUE	FALSE	FALSE	FALSE	FALSE	FALSE	FALSE	FALSE
Clinique St Gabriel	Quartiers des cités planifiées	2015-03-20	Quartiers excentriques et d'extension	29		Patiente venue d'elle même			2014-01-07				6		3		2		FALSE	TRUE	FALSE	FALSE	FALSE	FALSE	FALSE	FALSE	FALSE	FALSE	FALSE	FALSE	932	1	Avortement spontané	2014-01-07	Traitement médico-chirurgical	FALSE	FALSE	TRUE	FALSE	FALSE	FALSE	TRUE	FALSE	TRUE	FALSE	FALSE	FALSE	FALSE	FALSE
Clinique St Gabriel	Quartiers des cités planifiées	2015-03-20	Quartiers des cités planifiées	21		Patiente venue d'elle même			2014-10-31			110	2	70	0		1		TRUE	FALSE	FALSE	FALSE	FALSE	FALSE	FALSE	FALSE	FALSE	FALSE	FALSE	FALSE	933	1	Complication d'avortement provoqué	2014-10-31	Traitement médical	TRUE	FALSE	FALSE	FALSE	FALSE	FALSE	FALSE	FALSE	FALSE	TRUE	FALSE	FALSE	FALSE	FALSE
Clinique St Gabriel	Quartiers des cités planifiées	2015-03-24	Quartiers des cités planifiées	34		Patiente venue d'elle même			2014-11-24			100	5	60	4		0		FALSE	TRUE	FALSE	FALSE	FALSE	FALSE	FALSE	FALSE	FALSE	FALSE	FALSE	FALSE	934	1	Avortement spontané	2014-11-24	Traitement médico-chirurgical	FALSE	FALSE	FALSE	FALSE	FALSE	FALSE	FALSE	FALSE	FALSE	FALSE	FALSE	FALSE	FALSE	FALSE
Clinique St Gabriel	Quartiers des cités planifiées	2015-03-24	Quartiers des cités planifiées	28		Patiente venue d'elle même			2014-03-17			90	1	60	0		0		FALSE	TRUE	FALSE	FALSE	FALSE	FALSE	FALSE	FALSE	FALSE	FALSE	FALSE	FALSE	935	1	Avortement spontané		Traitement médico-chirurgical	FALSE	FALSE	FALSE	FALSE	FALSE	FALSE	FALSE	FALSE	FALSE	FALSE	FALSE	FALSE	FALSE	FALSE
Clinique St Gabriel	Quartiers des cités planifiées	2015-03-24	Quartiers excentriques et d'extension	30		Patiente venue d'elle même			2014-09-05										TRUE	FALSE	FALSE	FALSE	FALSE	FALSE	FALSE	FALSE	FALSE	FALSE	FALSE	FALSE	936	1	Complication d'avortement provoqué	2014-09-05	Traitement médical	FALSE	FALSE	FALSE	FALSE	FALSE	FALSE	FALSE	FALSE	FALSE	TRUE	FALSE	FALSE	FALSE	FALSE
Clinique St Gabriel	Quartiers des cités planifiées	2015-03-24	Quartiers excentriques et d'extension	25		Patiente venue d'elle même			2014-11-01				1		0		0		TRUE	FALSE	FALSE	FALSE	FALSE	FALSE	FALSE	FALSE	FALSE	FALSE	FALSE	FALSE	937	1	Complication d'avortement provoqué	2014-11-02	Traitement médico-chirurgical	FALSE	FALSE	FALSE	FALSE	FALSE	FALSE	FALSE	FALSE	FALSE	TRUE	FALSE	FALSE	FALSE	FALSE
Clinique St Gabriel	Quartiers des cités planifiées	2015-03-24	Quartiers résidentiels	29		Patiente venue d'elle même			2014-03-05			110	5	80	0		4		FALSE	TRUE	FALSE	FALSE	FALSE	FALSE	FALSE	FALSE	FALSE	FALSE	FALSE	FALSE	938	1	Avortement spontané	2014-03-05	Traitement médico-chirurgical	FALSE	FALSE	FALSE	FALSE	FALSE	FALSE	FALSE	FALSE	FALSE	FALSE	FALSE	FALSE	FALSE	FALSE
Clinique St Gabriel	Quartiers des cités planifiées	2015-03-24	Quartiers des cités planifiées			Patiente venue d'elle même			2014-03-03	2014-03-03 05:00:00			2		1		0		FALSE	TRUE	FALSE	FALSE	FALSE	FALSE	FALSE	FALSE	FALSE	FALSE	FALSE	FALSE	939	1	Avortement spontané	2014-03-03	Traitement médico-chirurgical	TRUE	FALSE	FALSE	TRUE	FALSE	FALSE	TRUE	FALSE	TRUE	FALSE	FALSE	TRUE	FALSE	FALSE
Clinique St Gabriel	Quartiers des cités planifiées	2015-03-24	Quartiers des cités planifiées	23		Patiente venue d'elle même			2014-03-02	2014-03-02 17:00:00									TRUE	FALSE	FALSE	FALSE	FALSE	FALSE	FALSE	FALSE	FALSE	FALSE	FALSE	FALSE	940	1	Complication d'avortement provoqué	2014-03-02	Traitement médico-chirurgical	TRUE	FALSE	FALSE	FALSE	FALSE	FALSE	TRUE	FALSE	TRUE	TRUE	FALSE	TRUE	FALSE	FALSE
Clinique St Gabriel	Quartiers des cités planifiées	2015-03-24	Quartiers des cités planifiées	31		Patiente venue d'elle même			2014-04-03	2014-04-03 13:20:00	39		5		2		2		TRUE	FALSE	FALSE	FALSE	FALSE	FALSE	FALSE	FALSE	FALSE	FALSE	FALSE	FALSE	941	1	Complication d'avortement provoqué		Traitement médical	FALSE	FALSE	TRUE	FALSE	FALSE	TRUE	TRUE	FALSE	FALSE	TRUE	FALSE	FALSE	FALSE	FALSE
Clinique St Gabriel	Quartiers des cités planifiées	2015-03-24	Quartiers des cités planifiées	44		Patiente venue d'elle même			2014-03-29	2014-03-29 14:10:00			3		2		0		FALSE	TRUE	FALSE	FALSE	FALSE	FALSE	FALSE	FALSE	FALSE	FALSE	FALSE	FALSE	942	1	Avortement spontané		Traitement médico-chirurgical	TRUE	FALSE	FALSE	TRUE	FALSE	FALSE	FALSE	FALSE	FALSE	TRUE	FALSE	FALSE	FALSE	FALSE
Clinique St Gabriel	Quartiers des cités planifiées	2015-03-24	Quartiers des cités planifiées	34		Patiente venue d'elle même			2014-06-03				6		5		0		FALSE	TRUE	FALSE	FALSE	FALSE	FALSE	FALSE	FALSE	FALSE	FALSE	FALSE	FALSE	943	1	Avortement spontané	2014-06-03	Traitement médico-chirurgical	FALSE	FALSE	FALSE	FALSE	FALSE	FALSE	FALSE	FALSE	FALSE	FALSE	FALSE	FALSE	FALSE	FALSE
Clinique St Gabriel	Quartiers des cités planifiées	2015-03-24	Quartiers des cités planifiées	28		Patiente venue d'elle même			2014-03-07				2		0		1		TRUE	FALSE	FALSE	FALSE	FALSE	FALSE	FALSE	FALSE	FALSE	FALSE	FALSE	FALSE	944	1	Complication d'avortement provoqué		Traitement médico-chirurgical	FALSE	FALSE	FALSE	FALSE	FALSE	FALSE	FALSE	FALSE	FALSE	FALSE	FALSE	FALSE	FALSE	FALSE
Clinique St Gabriel	Quartiers des cités planifiées	2015-03-24	Quartiers excentriques et d'extension	38		Patiente venue d'elle même			2014-01-13	2014-01-13 16:40:00		110		70					TRUE	FALSE	FALSE	FALSE	FALSE	FALSE	FALSE	FALSE	FALSE	FALSE	FALSE	FALSE	945	1	Complication d'avortement provoqué	2014-01-13	Traitement médical	FALSE	FALSE	TRUE	FALSE	FALSE	FALSE	FALSE	FALSE	FALSE	TRUE	FALSE	FALSE	FALSE	FALSE
Clinique St Gabriel	Quartiers des cités planifiées	2015-03-24	Quartiers des cités planifiées	28		Patiente venue d'elle même			2014-01-16	2014-01-16 18:55:00		120	2	60	1		0		TRUE	FALSE	FALSE	FALSE	FALSE	FALSE	FALSE	FALSE	FALSE	FALSE	FALSE	FALSE	946	1	Complication d'avortement provoqué	2014-01-16	Traitement médico-chirurgical	TRUE	FALSE	FALSE	TRUE	FALSE	FALSE	TRUE	FALSE	FALSE	TRUE	FALSE	FALSE	FALSE	FALSE
Clinique St Gabriel	Quartiers des cités planifiées	2015-03-24	Quartiers des cités planifiées	25		Patiente référée	Quartiers des cités planifiées		2014-06-06				3		2		0		FALSE	TRUE	FALSE	FALSE	FALSE	FALSE	FALSE	FALSE	FALSE	FALSE	FALSE	FALSE	947	1	Avortement spontané		Traitement médico-chirurgical	FALSE	FALSE	FALSE	FALSE	FALSE	FALSE	FALSE	FALSE	FALSE	FALSE	FALSE	FALSE	FALSE	FALSE
Clinique St Gabriel	Quartiers des cités planifiées	2015-03-24	Quartiers résidentiels	24		Patiente venue d'elle même			2014-11-18			100	4	60	3		0		TRUE	FALSE	FALSE	FALSE	FALSE	FALSE	FALSE	FALSE	FALSE	FALSE	FALSE	FALSE	948	1	Complication d'avortement provoqué	2014-11-18	Traitement médico-chirurgical	TRUE	FALSE	FALSE	TRUE	FALSE	FALSE	TRUE	FALSE	FALSE	FALSE	FALSE	TRUE	FALSE	FALSE
Clinique St Gabriel	Quartiers des cités planifiées	2015-03-24	Quartiers des cités planifiées	18		Patiente venue d'elle même			2014-03-07			120	1	80	0		0		TRUE	FALSE	FALSE	FALSE	FALSE	FALSE	FALSE	FALSE	FALSE	FALSE	FALSE	FALSE	949	1	Complication d'avortement provoqué	2014-03-07	Traitement médico-chirurgical	FALSE	FALSE	TRUE	TRUE	FALSE	FALSE	FALSE	FALSE	FALSE	TRUE	FALSE	FALSE	FALSE	FALSE
Clinique St Gabriel	Quartiers des cités planifiées	2015-03-24	Quartiers des cités planifiées	20		Patiente venue d'elle même			2014-05-18				0		0		0	1	TRUE	FALSE	FALSE	FALSE	FALSE	FALSE	FALSE	FALSE	FALSE	FALSE	FALSE	FALSE	950	1	Complication d'avortement provoqué	2014-05-18	Traitement médico-chirurgical	TRUE	FALSE	FALSE	TRUE	FALSE	FALSE	TRUE	FALSE	TRUE	FALSE	FALSE	FALSE	FALSE	FALSE
Clinique St Gabriel	Quartiers des cités planifiées	2015-03-24	Quartiers des cités planifiées	17		Patiente venue d'elle même			2014-01-04				1		0		0		TRUE	FALSE	FALSE	FALSE	FALSE	FALSE	FALSE	FALSE	FALSE	FALSE	FALSE	FALSE	951	1	Complication d'avortement provoqué	2014-01-04	Traitement médico-chirurgical	TRUE	FALSE	FALSE	TRUE	FALSE	FALSE	TRUE	FALSE	FALSE	FALSE	FALSE	FALSE	FALSE	FALSE
Clinique St Gabriel	Quartiers des cités planifiées	2015-03-24	Quartiers des cités planifiées	23		Patiente venue d'elle même			2014-04-04			100	2	60	1		0		TRUE	FALSE	FALSE	FALSE	FALSE	FALSE	FALSE	FALSE	FALSE	FALSE	FALSE	FALSE	952	1	Complication d'avortement provoqué	2014-04-04	Traitement médico-chirurgical	TRUE	FALSE	FALSE	TRUE	FALSE	FALSE	TRUE	FALSE	FALSE	FALSE	FALSE	TRUE	FALSE	FALSE
Clinique St Gabriel	Quartiers des cités planifiées	2015-03-24	Quartiers résidentiels	27		Patiente venue d'elle même			2014-09-19			80		40					FALSE	TRUE	FALSE	FALSE	FALSE	FALSE	FALSE	FALSE	FALSE	FALSE	FALSE	FALSE	953	1	Avortement spontané	2014-09-19	Traitement médico-chirurgical	FALSE	FALSE	FALSE	FALSE	FALSE	FALSE	FALSE	FALSE	FALSE	FALSE	FALSE	FALSE	FALSE	FALSE
Clinique St Gabriel	Quartiers des cités planifiées	2015-04-14	Quartiers des cités planifiées	28	Mariée	Patiente venue d'elle même			2014-07-11				5		4		0		FALSE	FALSE	FALSE	FALSE	FALSE	FALSE	FALSE	FALSE	FALSE	FALSE	FALSE	FALSE	954	1	Autres diagnostics	2014-07-12	Traitement médico-chirurgical	FALSE	FALSE	TRUE	FALSE	FALSE	FALSE	TRUE	FALSE	TRUE	FALSE	FALSE	FALSE	FALSE	FALSE
Clinique St Gabriel	Quartiers des cités planifiées	2015-04-14	Quartiers des cités planifiées	27		Patiente venue d'elle même			2014-07-24			170	2	130	1		0		FALSE	FALSE	FALSE	FALSE	TRUE	FALSE	FALSE	FALSE	FALSE	FALSE	FALSE	FALSE	955	1	Autres diagnostics		Traitement médico-chirurgical	FALSE	FALSE	TRUE	FALSE	FALSE	FALSE	TRUE	TRUE	TRUE	TRUE	FALSE	TRUE	FALSE	FALSE
Clinique St Gabriel	Quartiers des cités planifiées	2015-04-14	Quartiers des cités planifiées	27	Celibataire	Patiente venue d'elle même			2014-07-09	2014-07-09 14:50:00			1		0		0		FALSE	FALSE	FALSE	FALSE	FALSE	FALSE	FALSE	FALSE	TRUE	FALSE	FALSE	FALSE	956	1	Autres diagnostics	2014-07-12	Traitement médico-chirurgical	FALSE	FALSE	TRUE	FALSE	FALSE	FALSE	TRUE	FALSE	TRUE	FALSE	FALSE	TRUE	FALSE	FALSE
Clinique St Gabriel	Quartiers des cités planifiées	2015-04-14	Quartiers des cités planifiées	23		Patiente venue d'elle même			2014-10-09			90		60					FALSE	FALSE	FALSE	TRUE	FALSE	FALSE	FALSE	FALSE	FALSE	FALSE	FALSE	FALSE	957	1	Autres diagnostics	2014-10-09	Traitement médico-chirurgical	FALSE	FALSE	TRUE	FALSE	FALSE	FALSE	TRUE	FALSE	TRUE	FALSE	FALSE	FALSE	FALSE	FALSE
Clinique St Gabriel	Quartiers des cités planifiées	2015-04-14	Quartiers des cités planifiées	20		Patiente venue d'elle même			2014-10-13			100	1	50	0		0		FALSE	FALSE	FALSE	FALSE	FALSE	FALSE	FALSE	FALSE	FALSE	FALSE	FALSE	FALSE	958	1	Autres diagnostics	2014-10-14	Traitement médico-chirurgical	FALSE	FALSE	TRUE	FALSE	FALSE	FALSE	TRUE	FALSE	TRUE	FALSE	FALSE	FALSE	FALSE	FALSE
Clinique St Gabriel	Quartiers des cités planifiées	2015-04-14	Quartiers excentriques et d'extension	25	Mariée	Patiente venue d'elle même			2014-10-15				3		2		1		FALSE	FALSE	FALSE	TRUE	FALSE	FALSE	FALSE	FALSE	FALSE	TRUE	FALSE	FALSE	959	1	Autres diagnostics	2014-10-16	Traitement médico-chirurgical	FALSE	FALSE	TRUE	FALSE	FALSE	FALSE	TRUE	FALSE	TRUE	FALSE	FALSE	FALSE	FALSE	FALSE
Clinique St Gabriel	Quartiers des cités planifiées	2015-04-14	Quartiers des cités planifiées	20		Patiente venue d'elle même			2014-10-16	2014-10-16 06:40:00			1		0		0		FALSE	FALSE	FALSE	FALSE	FALSE	FALSE	FALSE	FALSE	FALSE	FALSE	FALSE	FALSE	960	1	Autres diagnostics	2014-10-17	Traitement médico-chirurgical	FALSE	FALSE	TRUE	FALSE	FALSE	FALSE	TRUE	FALSE	TRUE	FALSE	FALSE	FALSE	FALSE	FALSE
Clinique St Gabriel	Quartiers des cités planifiées	2015-04-14	Quartiers excentriques et d'extension	25	Mariée	Patiente venue d'elle même			2014-10-19	2014-10-19 21:40:00		90	3	60	0		2		FALSE	FALSE	FALSE	FALSE	FALSE	FALSE	FALSE	FALSE	TRUE	FALSE	FALSE	FALSE	961	1	Autres diagnostics	2014-10-21	Traitement médico-chirurgical	FALSE	FALSE	TRUE	FALSE	FALSE	FALSE	TRUE	FALSE	TRUE	FALSE	FALSE	FALSE	FALSE	FALSE
Clinique St Gabriel	Quartiers des cités planifiées	2015-04-14	Quartiers des cités planifiées	31		Patiente venue d'elle même			2014-10-13			100	1	70	0		0		FALSE	FALSE	FALSE	FALSE	FALSE	FALSE	FALSE	FALSE	TRUE	FALSE	FALSE	FALSE	962	1	Autres diagnostics		Traitement médico-chirurgical	FALSE	FALSE	TRUE	FALSE	FALSE	FALSE	TRUE	FALSE	TRUE	FALSE	FALSE	FALSE	FALSE	FALSE
Clinique St Gabriel	Quartiers des cités planifiées	2015-04-14	Quartiers des cités planifiées	29		Patiente venue d'elle même			2014-10-31	2014-10-31 22:45:00			5		3		1		FALSE	FALSE	FALSE	FALSE	FALSE	FALSE	FALSE	FALSE	FALSE	TRUE	FALSE	FALSE	963	1	Autres diagnostics		Traitement médico-chirurgical	FALSE	FALSE	TRUE	FALSE	FALSE	FALSE	TRUE	FALSE	TRUE	FALSE	FALSE	FALSE	FALSE	FALSE
Clinique St Gabriel	Quartiers des cités planifiées	2015-04-14	Quartiers des cités planifiées	29		Patiente venue d'elle même			2014-09-25				2		0		1		FALSE	FALSE	FALSE	FALSE	FALSE	FALSE	TRUE	FALSE	FALSE	FALSE	FALSE	FALSE	964	1	Autres diagnostics	2014-09-25	Traitement médico-chirurgical	FALSE	FALSE	TRUE	FALSE	FALSE	FALSE	TRUE	FALSE	TRUE	FALSE	FALSE	FALSE	FALSE	FALSE
Clinique St Gabriel	Quartiers des cités planifiées	2015-04-14	Quartiers excentriques et d'extension	25		Patiente venue d'elle même			2014-01-06				3		2		1		FALSE	FALSE	FALSE	FALSE	FALSE	FALSE	FALSE	FALSE	FALSE	FALSE	FALSE	FALSE	965	1	Autres diagnostics		Traitement médico-chirurgical	FALSE	FALSE	TRUE	FALSE	FALSE	FALSE	TRUE	FALSE	TRUE	FALSE	FALSE	FALSE	FALSE	FALSE
Clinique St Gabriel	Quartiers des cités planifiées	2015-04-14	Quartiers des cités planifiées	21		Patiente venue d'elle même			2014-10-07										FALSE	FALSE	FALSE	FALSE	FALSE	FALSE	TRUE	FALSE	FALSE	FALSE	FALSE	FALSE	966	1	Autres diagnostics		Traitement médico-chirurgical	TRUE	FALSE	FALSE	FALSE	FALSE	FALSE	TRUE	FALSE	FALSE	TRUE	FALSE	FALSE	FALSE	FALSE
Clinique St Gabriel	Quartiers des anciennes cités	2015-04-14	Quartiers des cités planifiées	20		Patiente venue d'elle même			2014-11-04			120		70					FALSE	FALSE	FALSE	FALSE	FALSE	FALSE	FALSE	FALSE	FALSE	FALSE	FALSE	TRUE	967	1	Autres diagnostics		Traitement médico-chirurgical	FALSE	FALSE	TRUE	FALSE	FALSE	FALSE	FALSE	FALSE	TRUE	TRUE	FALSE	TRUE	FALSE	FALSE
Clinique St Gabriel	Quartiers des anciennes cités	2015-04-14	Quartiers résidentiels	33		Patiente venue d'elle même			2014-11-19										FALSE	FALSE	FALSE	FALSE	FALSE	FALSE	FALSE	FALSE	FALSE	FALSE	TRUE	FALSE	968	1	Autres diagnostics		Traitement médico-chirurgical	FALSE	FALSE	TRUE	FALSE	FALSE	FALSE	TRUE	FALSE	TRUE	FALSE	FALSE	TRUE	FALSE	FALSE
Clinique St Gabriel	Quartiers des anciennes cités	2015-04-14	Quartiers des cités planifiées	36	Celibataire	Patiente venue d'elle même			2014-07-18	2014-07-18 10:45:00		100	2	60	1		0		FALSE	FALSE	FALSE	FALSE	FALSE	FALSE	FALSE	FALSE	FALSE	FALSE	TRUE	FALSE	969	1	Autres diagnostics	2014-07-18	Traitement médico-chirurgical	FALSE	FALSE	FALSE	TRUE	FALSE	FALSE	FALSE	FALSE	FALSE	TRUE	FALSE	FALSE	FALSE	FALSE
Clinique St Gabriel	Quartiers des anciennes cités	2015-04-13	Quartiers résidentiels	29		Patiente venue d'elle même			2014-10-01	2014-10-01 18:30:00									FALSE	TRUE	FALSE	FALSE	FALSE	FALSE	FALSE	FALSE	FALSE	FALSE	FALSE	FALSE	970	1	Avortement spontané	2014-10-01	Traitement médico-chirurgical	FALSE	FALSE	FALSE	FALSE	TRUE	FALSE	TRUE	FALSE	TRUE	FALSE	FALSE	FALSE	FALSE	FALSE
Clinique St Gabriel	Quartiers des anciennes cités	2015-04-13	Quartiers excentriques et d'extension	27		Patiente venue d'elle même			2014-05-21										FALSE	TRUE	FALSE	FALSE	FALSE	FALSE	FALSE	FALSE	FALSE	FALSE	FALSE	FALSE	971	1	Avortement spontané	2014-05-21	Traitement médico-chirurgical	TRUE	FALSE	FALSE	TRUE	FALSE	FALSE	TRUE	FALSE	TRUE	FALSE	FALSE	TRUE	FALSE	FALSE
Clinique St Gabriel	Quartiers des anciennes cités	2015-04-13	Quartiers des cités planifiées	25		Patiente venue d'elle même			2014-09-14		36	120	1	60	0		0		FALSE	FALSE	FALSE	FALSE	FALSE	FALSE	FALSE	FALSE	FALSE	TRUE	FALSE	FALSE	972	1	Autres diagnostics		Traitement médico-chirurgical	TRUE	FALSE	FALSE	FALSE	FALSE	FALSE	TRUE	FALSE	TRUE	FALSE	FALSE	FALSE	FALSE	FALSE
Clinique St Gabriel	Quartiers des anciennes cités	2015-04-13	Quartiers des cités planifiées	23		Patiente référée	Quartiers excentriques et d'extension		2014-11-02	2014-11-02 14:47:00									FALSE	FALSE	FALSE	FALSE	FALSE	FALSE	FALSE	FALSE	FALSE	FALSE	FALSE	FALSE	973	1	Autres diagnostics	2014-11-02	Traitement médico-chirurgical	FALSE	FALSE	TRUE	FALSE	FALSE	FALSE	TRUE	FALSE	FALSE	FALSE	FALSE	TRUE	FALSE	FALSE
Clinique St Gabriel	Quartiers des anciennes cités	2015-04-13	Quartiers des cités planifiées	29		Patiente venue d'elle même			2014-09-23	2014-09-23 21:35:00									FALSE	FALSE	FALSE	FALSE	FALSE	FALSE	FALSE	FALSE	FALSE	FALSE	FALSE	FALSE	974	1	Autres diagnostics	2014-09-24	Traitement médico-chirurgical	FALSE	FALSE	TRUE	FALSE	FALSE	FALSE	TRUE	FALSE	TRUE	FALSE	FALSE	FALSE	FALSE	TRUE
Clinique St Gabriel	Quartiers des anciennes cités	2015-04-13	Quartiers des cités planifiées	25		Patiente venue d'elle même			2014-10-02		37	130		70					FALSE	FALSE	FALSE	FALSE	FALSE	FALSE	FALSE	FALSE	FALSE	FALSE	FALSE	FALSE	975	1	Autres diagnostics	2014-10-04	Traitement médico-chirurgical	FALSE	FALSE	TRUE	FALSE	FALSE	FALSE	TRUE	FALSE	TRUE	FALSE	FALSE	FALSE	FALSE	FALSE
Clinique St Gabriel	Quartiers des anciennes cités	2015-04-13	Quartiers des cités planifiées	44		Patiente venue d'elle même			2014-03-11			120	4	80	4		0		FALSE	FALSE	FALSE	FALSE	FALSE	FALSE	FALSE	FALSE	FALSE	FALSE	TRUE	FALSE	976	1	Autres diagnostics	2014-03-11	Traitement médico-chirurgical	FALSE	FALSE	FALSE	FALSE	FALSE	FALSE	FALSE	FALSE	FALSE	FALSE	FALSE	FALSE	FALSE	FALSE
Clinique St Gabriel	Quartiers des anciennes cités	2015-04-13	Quartiers excentriques et d'extension	28		Patiente venue d'elle même			2014-08-05			110	3	70	1		1		FALSE	TRUE	FALSE	FALSE	FALSE	FALSE	FALSE	FALSE	FALSE	FALSE	FALSE	FALSE	977	1	Autres diagnostics	2014-08-05	Traitement médico-chirurgical	FALSE	FALSE	FALSE	FALSE	FALSE	FALSE	FALSE	FALSE	FALSE	FALSE	FALSE	FALSE	FALSE	FALSE
Clinique St Gabriel	Quartiers des anciennes cités	2015-04-13	Quartiers des cités planifiées	26		Patiente venue d'elle même			2014-08-22			110		70					FALSE	FALSE	FALSE	FALSE	FALSE	FALSE	TRUE	FALSE	FALSE	FALSE	FALSE	FALSE	978	1	Autres diagnostics	2014-08-22	Traitement médico-chirurgical	FALSE	FALSE	TRUE	FALSE	FALSE	FALSE	TRUE	FALSE	TRUE	FALSE	FALSE	TRUE	FALSE	FALSE
Clinique St Gabriel	Quartiers des anciennes cités	2015-04-13	Quartiers des cités planifiées	30		Patiente venue d'elle même			2014-10-17			110	6	70	2		3		FALSE	TRUE	FALSE	FALSE	FALSE	FALSE	FALSE	FALSE	FALSE	FALSE	FALSE	FALSE	979	1	Avortement spontané	2014-10-17	Traitement médico-chirurgical	FALSE	FALSE	FALSE	FALSE	FALSE	FALSE	FALSE	FALSE	FALSE	FALSE	FALSE	FALSE	FALSE	FALSE
Clinique St Gabriel	Quartiers des anciennes cités	2015-04-13		36		Patiente venue d'elle même			2014-06-07				3		1		1		FALSE	TRUE	FALSE	FALSE	FALSE	FALSE	FALSE	FALSE	FALSE	FALSE	FALSE	FALSE	980	1	Avortement spontané	2014-06-07	Traitement médico-chirurgical	TRUE	FALSE	FALSE	FALSE	FALSE	FALSE	TRUE	FALSE	FALSE	FALSE	FALSE	TRUE	FALSE	FALSE
Clinique St Gabriel	Quartiers des anciennes cités	2015-04-13	Quartiers des cités planifiées	25		Patiente venue d'elle même			2014-07-28	2014-07-28 10:45:00									FALSE	FALSE	FALSE	FALSE	FALSE	FALSE	FALSE	FALSE	FALSE	FALSE	TRUE	FALSE	981	1	Autres diagnostics		Traitement médico-chirurgical	TRUE	FALSE	FALSE	FALSE	FALSE	FALSE	FALSE	FALSE	TRUE	FALSE	FALSE	FALSE	FALSE	FALSE
Clinique St Gabriel	Quartiers des anciennes cités	2015-04-13	Quartiers des cités planifiées	18		Patiente référée		2014-02-14	2014-02-14	2014-02-14 09:25:00	37.8	110	2	60	0		1		TRUE	FALSE	FALSE	FALSE	FALSE	FALSE	FALSE	FALSE	FALSE	FALSE	FALSE	FALSE	982	1	Complication d'avortement provoqué	2014-02-14	Traitement médico-chirurgical	FALSE	FALSE	FALSE	FALSE	TRUE	FALSE	TRUE	FALSE	TRUE	FALSE	FALSE	TRUE	FALSE	FALSE
Clinique St Gabriel	Quartiers des anciennes cités	2015-04-13	Quartiers des cités planifiées	49		Patiente venue d'elle même			2014-08-09	2014-08-09 17:10:00			6		5		0		FALSE	FALSE	FALSE	FALSE	FALSE	FALSE	FALSE	FALSE	FALSE	FALSE	TRUE	FALSE	983	1	Autres diagnostics	2014-08-09	Traitement médico-chirurgical	FALSE	TRUE	TRUE	FALSE	FALSE	FALSE	TRUE	FALSE	TRUE	FALSE	FALSE	FALSE	FALSE	FALSE
Clinique St Gabriel	Quartiers des anciennes cités	2015-04-13	Quartiers des cités planifiées	18		Patiente venue d'elle même			2014-08-09	2014-08-09 10:05:00			2		0		1		TRUE	FALSE	FALSE	FALSE	FALSE	FALSE	FALSE	FALSE	FALSE	FALSE	FALSE	FALSE	984	1	Complication d'avortement provoqué	2014-08-09	Traitement médical	FALSE	FALSE	TRUE	FALSE	FALSE	FALSE	FALSE	FALSE	TRUE	FALSE	FALSE	TRUE	FALSE	FALSE
Clinique St Gabriel	Quartiers des anciennes cités	2015-04-13	Quartiers des cités planifiées	33		Patiente venue d'elle même			2014-07-15	2014-07-15 09:50:00									FALSE	FALSE	FALSE	FALSE	FALSE	FALSE	FALSE	FALSE	FALSE	FALSE	TRUE	FALSE	985	1	Autres diagnostics	2014-07-15	Traitement médico-chirurgical	FALSE	FALSE	TRUE	FALSE	FALSE	FALSE	TRUE	FALSE	TRUE	FALSE	FALSE	TRUE	FALSE	FALSE
Clinique St Gabriel	Quartiers des anciennes cités	2014-03-25	Quartiers des cités planifiées	27	Mariée	Patiente venue d'elle même			2014-06-13	2014-06-13 23:05:00			4		0		3		FALSE	FALSE	FALSE	FALSE	FALSE	FALSE	FALSE	FALSE	FALSE	FALSE	FALSE	FALSE	986	1	Autres diagnostics	2014-06-15	Traitement médico-chirurgical	FALSE	FALSE	TRUE	FALSE	FALSE	FALSE	TRUE	FALSE	TRUE	FALSE	FALSE	FALSE	FALSE	FALSE
Clinique St Gabriel	Quartiers des anciennes cités	2014-03-25	Quartiers des cités planifiées	29		Patiente venue d'elle même			2014-04-10			160		90					FALSE	FALSE	FALSE	FALSE	TRUE	FALSE	FALSE	FALSE	FALSE	FALSE	FALSE	FALSE	987	1	Autres diagnostics		Traitement médico-chirurgical	FALSE	FALSE	TRUE	FALSE	FALSE	FALSE	TRUE	FALSE	TRUE	FALSE	FALSE	FALSE	FALSE	FALSE
Clinique St Gabriel	Quartiers des anciennes cités	2014-03-25	Quartiers excentriques et d'extension	29		Patiente venue d'elle même			2014-07-19				1		0		0		FALSE	FALSE	FALSE	FALSE	FALSE	FALSE	TRUE	FALSE	FALSE	FALSE	FALSE	FALSE	988	1	Autres diagnostics		Traitement médico-chirurgical	FALSE	FALSE	TRUE	FALSE	FALSE	FALSE	TRUE	FALSE	TRUE	FALSE	FALSE	FALSE	FALSE	FALSE
Clinique St Gabriel	Quartiers des anciennes cités	2014-03-25	Quartiers excentriques et d'extension	24		Patiente venue d'elle même			2014-08-11	2014-08-11 01:15:00			1		0		0		FALSE	FALSE	FALSE	FALSE	FALSE	FALSE	FALSE	FALSE	FALSE	TRUE	FALSE	FALSE	989	1	Autres diagnostics		Traitement médico-chirurgical	FALSE	FALSE	TRUE	FALSE	FALSE	FALSE	TRUE	FALSE	TRUE	FALSE	FALSE	FALSE	FALSE	TRUE
Clinique St Gabriel	Quartiers des anciennes cités	2014-03-25	Quartiers des cités planifiées	22		Patiente venue d'elle même			2014-05-01	2014-05-01 00:55:00		110	2	70	1				FALSE	FALSE	FALSE	FALSE	FALSE	FALSE	FALSE	FALSE	FALSE	FALSE	FALSE	FALSE	990	1	Autres diagnostics		Traitement médico-chirurgical	FALSE	FALSE	TRUE	FALSE	FALSE	FALSE	TRUE	FALSE	TRUE	FALSE	FALSE	FALSE	FALSE	FALSE
Clinique St Gabriel	Quartiers des anciennes cités	2015-04-15	Quartiers résidentiels	19		Patiente venue d'elle même			2014-02-23	2014-02-23 14:20:00		100	1	70	0		0		TRUE	FALSE	FALSE	FALSE	FALSE	FALSE	FALSE	FALSE	FALSE	FALSE	FALSE	FALSE	991	1	Complication d'avortement provoqué	2014-02-23	Traitement médico-chirurgical	FALSE	FALSE	TRUE	FALSE	FALSE	FALSE	TRUE	FALSE	TRUE	FALSE	FALSE	TRUE	FALSE	FALSE
Clinique St Gabriel	Quartiers des anciennes cités	2015-04-15	Quartiers des cités planifiées	20		Patiente venue d'elle même			2014-02-26										FALSE	FALSE	FALSE	FALSE	FALSE	FALSE	FALSE	FALSE	FALSE	FALSE	FALSE	FALSE	992	1	Autres diagnostics		Traitement médico-chirurgical	FALSE	FALSE	TRUE	FALSE	FALSE	FALSE	FALSE	FALSE	TRUE	TRUE	FALSE	FALSE	FALSE	FALSE
Clinique St Gabriel	Quartiers des anciennes cités	2015-04-15	Quartiers excentriques et d'extension	40		Patiente venue d'elle même			2014-02-01										FALSE	FALSE	FALSE	FALSE	FALSE	FALSE	FALSE	FALSE	FALSE	FALSE	FALSE	FALSE	993	1	Autres diagnostics	2014-02-01	Traitement médico-chirurgical	TRUE	FALSE	FALSE	FALSE	FALSE	FALSE	TRUE	FALSE	TRUE	FALSE	FALSE	FALSE	FALSE	FALSE
Clinique St Gabriel	Quartiers des anciennes cités	2015-04-15	Quartiers excentriques et d'extension	36		Patiente venue d'elle même			2014-02-08	2014-02-08 10:20:00			4		4		0		FALSE	FALSE	FALSE	FALSE	FALSE	FALSE	FALSE	FALSE	FALSE	FALSE	FALSE	FALSE	994	1	Autres diagnostics		Traitement médico-chirurgical	FALSE	FALSE	TRUE	FALSE	FALSE	FALSE	FALSE	FALSE	TRUE	TRUE	FALSE	TRUE	FALSE	FALSE
Clinique St Gabriel	Quartiers des anciennes cités	2015-04-15	Quartiers des cités planifiées	14		Patiente venue d'elle même			2014-02-07	2014-02-07 00:09:00									FALSE	FALSE	FALSE	FALSE	FALSE	FALSE	FALSE	FALSE	FALSE	FALSE	FALSE	FALSE	995	1	Autres diagnostics		Traitement médico-chirurgical	FALSE	FALSE	TRUE	FALSE	FALSE	FALSE	FALSE	FALSE	TRUE	TRUE	FALSE	FALSE	FALSE	FALSE
Clinique St Gabriel	Quartiers des anciennes cités	2015-04-15	Quartiers excentriques et d'extension	29		Patiente venue d'elle même			2014-02-07	2014-02-07 09:35:00									FALSE	FALSE	FALSE	FALSE	FALSE	FALSE	FALSE	FALSE	FALSE	FALSE	FALSE	FALSE	996	1	Autres diagnostics		Traitement médico-chirurgical	TRUE	FALSE	FALSE	FALSE	FALSE	FALSE	FALSE	FALSE	TRUE	TRUE	FALSE	FALSE	FALSE	FALSE
Clinique St Gabriel	Quartiers des anciennes cités	2015-04-15	Quartiers des cités planifiées	40		Patiente venue d'elle même			2014-03-12	2014-03-12 00:15:00			5		4		1		FALSE	FALSE	FALSE	FALSE	FALSE	FALSE	FALSE	FALSE	FALSE	FALSE	FALSE	FALSE	997	1	Autres diagnostics	2014-03-25	Traitement médico-chirurgical	TRUE	FALSE	FALSE	FALSE	FALSE	FALSE	FALSE	FALSE	TRUE	TRUE	FALSE	FALSE	FALSE	FALSE
Clinique St Gabriel	Quartiers des anciennes cités	2015-04-15	Quartiers excentriques et d'extension	17		Patiente venue d'elle même			2014-04-16	2014-04-16 11:06:00	37								FALSE	FALSE	FALSE	FALSE	FALSE	FALSE	FALSE	FALSE	FALSE	FALSE	FALSE	FALSE	998	1	Autres diagnostics		Traitement médico-chirurgical	FALSE	FALSE	FALSE	FALSE	TRUE	FALSE	FALSE	FALSE	TRUE	TRUE	FALSE	FALSE	FALSE	FALSE
Clinique St Gabriel	Quartiers des anciennes cités	2015-04-15	Quartiers des cités planifiées	14		Patiente venue d'elle même			2014-01-03										FALSE	FALSE	FALSE	FALSE	FALSE	FALSE	FALSE	FALSE	FALSE	FALSE	FALSE	FALSE	999	1	Autres diagnostics		Traitement médico-chirurgical	FALSE	FALSE	TRUE	FALSE	FALSE	FALSE	FALSE	FALSE	TRUE	TRUE	FALSE	TRUE	FALSE	FALSE
Clinique St Gabriel	Quartiers des anciennes cités	2015-04-15	Quartiers semi-ruraux	32		Patiente venue d'elle même			2014-01-14			100	9	80	6				FALSE	FALSE	FALSE	FALSE	FALSE	FALSE	FALSE	FALSE	FALSE	FALSE	FALSE	FALSE	1000	1	Autres diagnostics		Traitement médico-chirurgical	FALSE	FALSE	FALSE	FALSE	TRUE	FALSE	FALSE	FALSE	TRUE	TRUE	FALSE	FALSE	FALSE	FALSE
Clinique St Gabriel	Quartiers des anciennes cités	2015-04-15	Quartiers excentriques et d'extension	27		Patiente venue d'elle même			2014-01-03	2014-01-03 11:10:00									FALSE	FALSE	FALSE	FALSE	FALSE	FALSE	FALSE	FALSE	FALSE	FALSE	TRUE	FALSE	1001	1	Autres diagnostics	2014-01-03	Traitement médico-chirurgical	FALSE	FALSE	TRUE	FALSE	FALSE	FALSE	TRUE	FALSE	TRUE	TRUE	FALSE	TRUE	FALSE	FALSE
Clinique St Gabriel	Quartiers des anciennes cités	2015-04-15	Quartiers des cités planifiées	24		Patiente venue d'elle même			2014-01-21	2014-01-21 09:38:00			2		1		1		FALSE	FALSE	FALSE	FALSE	FALSE	FALSE	FALSE	FALSE	FALSE	FALSE	FALSE	FALSE	1002	1	Autres diagnostics	2014-01-21	Traitement médico-chirurgical	FALSE	FALSE	TRUE	FALSE	FALSE	FALSE	FALSE	FALSE	TRUE	TRUE	FALSE	TRUE	FALSE	FALSE
Clinique St Gabriel	Quartiers des anciennes cités	2015-04-15	Quartiers excentriques et d'extension	34		Patiente venue d'elle même			2014-01-13			110		70					FALSE	FALSE	FALSE	FALSE	FALSE	FALSE	FALSE	FALSE	FALSE	FALSE	TRUE	FALSE	1003	1	Autres diagnostics	2014-01-13	Traitement médico-chirurgical	FALSE	TRUE	FALSE	FALSE	TRUE	FALSE	TRUE	FALSE	TRUE	TRUE	FALSE	TRUE	FALSE	FALSE
Clinique St Gabriel	Quartiers des anciennes cités	2015-04-15	Quartiers des cités planifiées	20		Patiente venue d'elle même			2014-04-03	2014-04-03 15:00:00									FALSE	FALSE	FALSE	FALSE	FALSE	FALSE	FALSE	FALSE	FALSE	FALSE	FALSE	FALSE	1004	1	Autres diagnostics		Traitement médico-chirurgical	FALSE	FALSE	TRUE	FALSE	FALSE	FALSE	FALSE	FALSE	TRUE	TRUE	FALSE	TRUE	FALSE	FALSE
Clinique St Gabriel	Quartiers des anciennes cités	2015-04-15	Quartiers des cités planifiées	27	Mariée	Patiente venue d'elle même			2014-11-04	2014-11-04 00:10:00			2		2		0		FALSE	FALSE	FALSE	FALSE	FALSE	FALSE	FALSE	FALSE	FALSE	TRUE	FALSE	FALSE	1005	1	Autres diagnostics	2014-11-05	Traitement médico-chirurgical	FALSE	FALSE	TRUE	FALSE	FALSE	FALSE	TRUE	FALSE	TRUE	FALSE	FALSE	FALSE	FALSE	FALSE
Clinique St Gabriel	Quartiers des anciennes cités	2015-04-15	Quartiers des cités planifiées	24	Mariée	Patiente venue d'elle même			2014-06-02				1		0		1		FALSE	FALSE	FALSE	FALSE	FALSE	FALSE	FALSE	FALSE	FALSE	TRUE	FALSE	FALSE	1006	1	Autres diagnostics		Traitement médico-chirurgical	FALSE	FALSE	TRUE	FALSE	FALSE	FALSE	TRUE	FALSE	TRUE	FALSE	FALSE	FALSE	FALSE	FALSE
Clinique St Gabriel	Quartiers des anciennes cités	2015-04-15	Quartiers excentriques et d'extension	23		Patiente venue d'elle même			2014-09-01			120	1	70	0		0		FALSE	FALSE	FALSE	FALSE	FALSE	FALSE	FALSE	FALSE	FALSE	FALSE	TRUE	FALSE	1007	1	Autres diagnostics		Traitement médico-chirurgical	FALSE	FALSE	TRUE	FALSE	FALSE	FALSE	TRUE	FALSE	TRUE	FALSE	FALSE	FALSE	FALSE	FALSE
Clinique St Gabriel	Quartiers des anciennes cités	2015-04-15	Quartiers excentriques et d'extension	34		Patiente venue d'elle même			2014-09-10	2014-09-10 03:15:00			3		2		0		FALSE	FALSE	FALSE	TRUE	FALSE	FALSE	FALSE	FALSE	FALSE	FALSE	FALSE	FALSE	1008	1	Autres diagnostics	2014-09-10	Traitement médico-chirurgical	FALSE	FALSE	TRUE	FALSE	FALSE	FALSE	TRUE	FALSE	TRUE	FALSE	FALSE	FALSE	FALSE	FALSE
Clinique St Gabriel	Quartiers des anciennes cités	2015-04-15	Quartiers des cités planifiées	20		Patiente venue d'elle même			2014-09-15	2014-09-15 13:48:00		90	1	60	0		0		FALSE	FALSE	FALSE	FALSE	FALSE	FALSE	FALSE	FALSE	FALSE	TRUE	FALSE	FALSE	1009	1	Autres diagnostics	2014-09-16	Traitement médico-chirurgical	FALSE	FALSE	TRUE	FALSE	FALSE	FALSE	TRUE	FALSE	TRUE	FALSE	FALSE	FALSE	FALSE	FALSE
Clinique St Gabriel	Quartiers des anciennes cités	2015-04-15	Quartiers des cités planifiées			Patiente venue d'elle même			2014-04-29	2014-04-29 21:15:00			2		1		0		FALSE	FALSE	FALSE	TRUE	FALSE	FALSE	FALSE	FALSE	FALSE	FALSE	FALSE	FALSE	1010	1	Autres diagnostics	2014-04-30	Traitement médico-chirurgical	FALSE	FALSE	TRUE	FALSE	FALSE	FALSE	TRUE	FALSE	TRUE	FALSE	FALSE	FALSE	FALSE	FALSE
HGR de Bumbu	Quartiers excentriques et d'extension	2015-03-13	Quartiers excentriques et d'extension	31		Patiente référée		2014-01-01	2014-01-01										TRUE	FALSE	FALSE	FALSE	FALSE	FALSE	FALSE	FALSE	FALSE	FALSE	FALSE	FALSE	1011	1	Complication d'avortement provoqué	2014-01-01	Traitement médico-chirurgical	FALSE	FALSE	FALSE	FALSE	FALSE	FALSE	FALSE	FALSE	FALSE	FALSE	FALSE	FALSE	FALSE	FALSE
HGR de Bumbu	Quartiers excentriques et d'extension	2015-03-13	Quartiers excentriques et d'extension			Patiente venue d'elle même			2014-01-28										FALSE	TRUE	FALSE	FALSE	FALSE	FALSE	FALSE	FALSE	FALSE	FALSE	FALSE	FALSE	1012	1	Avortement spontané	2014-01-28	Traitement médico-chirurgical	FALSE	FALSE	FALSE	FALSE	FALSE	FALSE	FALSE	FALSE	FALSE	TRUE	FALSE	FALSE	FALSE	FALSE
HGR de Bumbu	Quartiers excentriques et d'extension	2015-03-13	Quartiers excentriques et d'extension	26		Patiente venue d'elle même			2014-02-27										TRUE	FALSE	FALSE	FALSE	FALSE	FALSE	FALSE	FALSE	FALSE	FALSE	FALSE	FALSE	1013	1	Complication d'avortement provoqué	2014-02-27	Traitement médico-chirurgical	FALSE	FALSE	TRUE	FALSE	FALSE	FALSE	FALSE	FALSE	FALSE	FALSE	FALSE	TRUE	FALSE	FALSE
HGR de Bumbu	Quartiers excentriques et d'extension	2015-03-13	Quartiers excentriques et d'extension	19		Patiente venue d'elle même			2014-02-27										TRUE	FALSE	FALSE	FALSE	FALSE	FALSE	FALSE	FALSE	FALSE	FALSE	FALSE	FALSE	1014	1	Complication d'avortement provoqué	2014-02-27	Traitement médico-chirurgical	FALSE	FALSE	FALSE	FALSE	FALSE	FALSE	FALSE	FALSE	FALSE	TRUE	FALSE	FALSE	FALSE	FALSE
HGR de Bumbu	Quartiers excentriques et d'extension	2015-03-13	Quartiers excentriques et d'extension	22		Patiente venue d'elle même			2014-03-03										TRUE	FALSE	FALSE	FALSE	FALSE	FALSE	FALSE	FALSE	FALSE	FALSE	FALSE	FALSE	1015	1	Complication d'avortement provoqué	2014-03-03	Traitement médico-chirurgical	FALSE	FALSE	TRUE	FALSE	FALSE	FALSE	FALSE	FALSE	FALSE	FALSE	FALSE	TRUE	FALSE	FALSE
HGR de Bumbu	Quartiers excentriques et d'extension	2015-03-13	Quartiers excentriques et d'extension	37		Patiente venue d'elle même			2014-03-04										TRUE	FALSE	FALSE	FALSE	FALSE	FALSE	FALSE	FALSE	FALSE	FALSE	FALSE	FALSE	1016	1	Complication d'avortement provoqué	2014-03-04	Traitement médico-chirurgical	FALSE	FALSE	TRUE	FALSE	FALSE	FALSE	FALSE	FALSE	FALSE	FALSE	FALSE	TRUE	FALSE	FALSE
HGR de Bumbu	Quartiers excentriques et d'extension	2015-03-13	Quartiers excentriques et d'extension	32		Patiente venue d'elle même			2014-03-13										TRUE	FALSE	FALSE	FALSE	FALSE	FALSE	FALSE	FALSE	FALSE	FALSE	FALSE	FALSE	1017	1	Complication d'avortement provoqué	2014-03-14	Traitement médico-chirurgical	FALSE	FALSE	FALSE	FALSE	FALSE	FALSE	FALSE	FALSE	FALSE	FALSE	FALSE	FALSE	FALSE	FALSE
HGR de Bumbu	Quartiers excentriques et d'extension	2015-03-13	Quartiers excentriques et d'extension	22		Patiente venue d'elle même			2014-03-31										TRUE	FALSE	FALSE	FALSE	FALSE	FALSE	FALSE	FALSE	FALSE	FALSE	FALSE	FALSE	1018	1	Complication d'avortement provoqué	2014-03-31	Traitement médico-chirurgical	FALSE	FALSE	FALSE	FALSE	FALSE	FALSE	FALSE	FALSE	FALSE	FALSE	FALSE	FALSE	FALSE	FALSE
HGR de Bumbu	Quartiers excentriques et d'extension	2015-03-13	Quartiers excentriques et d'extension	20		Patiente venue d'elle même			2014-04-12										TRUE	FALSE	FALSE	FALSE	FALSE	FALSE	FALSE	FALSE	FALSE	FALSE	FALSE	FALSE	1019	1	Complication d'avortement provoqué	2014-04-12	Traitement médico-chirurgical	TRUE	FALSE	FALSE	FALSE	FALSE	FALSE	FALSE	FALSE	FALSE	TRUE	FALSE	FALSE	FALSE	FALSE
HGR de Bumbu	Quartiers excentriques et d'extension	2015-03-13	Quartiers excentriques et d'extension	18		Patiente venue d'elle même			2014-04-14										TRUE	FALSE	FALSE	FALSE	FALSE	FALSE	FALSE	FALSE	FALSE	FALSE	FALSE	FALSE	1020	1	Complication d'avortement provoqué	2014-04-14	Traitement médico-chirurgical	FALSE	FALSE	FALSE	FALSE	FALSE	FALSE	FALSE	FALSE	FALSE	FALSE	FALSE	FALSE	FALSE	FALSE
HGR de Bumbu	Quartiers excentriques et d'extension	2015-03-13	Quartiers excentriques et d'extension	19		Patiente venue d'elle même			2014-04-27										TRUE	FALSE	FALSE	FALSE	FALSE	FALSE	FALSE	FALSE	FALSE	FALSE	FALSE	FALSE	1021	1	Complication d'avortement provoqué	2014-04-27	Traitement médico-chirurgical	FALSE	FALSE	FALSE	FALSE	FALSE	FALSE	FALSE	FALSE	FALSE	FALSE	FALSE	FALSE	FALSE	FALSE
HGR de Bumbu	Quartiers excentriques et d'extension	2015-03-13	Quartiers des cités planifiées	26		Patiente venue d'elle même			2014-07-02										TRUE	FALSE	FALSE	FALSE	FALSE	FALSE	FALSE	FALSE	FALSE	FALSE	FALSE	FALSE	1022	1	Complication d'avortement provoqué	2014-07-02	Traitement médico-chirurgical	FALSE	FALSE	FALSE	FALSE	FALSE	FALSE	FALSE	FALSE	FALSE	FALSE	FALSE	FALSE	FALSE	FALSE
HGR de Bumbu	Quartiers excentriques et d'extension	2015-03-13	Quartiers excentriques et d'extension			Patiente venue d'elle même			2014-07-03										FALSE	TRUE	FALSE	FALSE	FALSE	FALSE	FALSE	FALSE	FALSE	FALSE	FALSE	FALSE	1023	1	Avortement spontané	2014-07-03	Traitement médico-chirurgical	FALSE	FALSE	TRUE	FALSE	FALSE	FALSE	FALSE	FALSE	FALSE	TRUE	FALSE	FALSE	FALSE	FALSE
HGR de Bumbu	Quartiers excentriques et d'extension	2015-03-13	Quartiers excentriques et d'extension	46		Patiente venue d'elle même			2014-08-10										FALSE	TRUE	FALSE	FALSE	FALSE	FALSE	FALSE	FALSE	FALSE	FALSE	FALSE	FALSE	1024	1	Avortement spontané	2014-08-10	Traitement médico-chirurgical	FALSE	FALSE	FALSE	FALSE	FALSE	FALSE	FALSE	FALSE	FALSE	FALSE	FALSE	FALSE	FALSE	FALSE
HGR de Bumbu	Quartiers excentriques et d'extension	2015-03-16	Quartiers excentriques et d'extension	20		Patiente venue d'elle même			2014-09-17										TRUE	FALSE	FALSE	FALSE	FALSE	FALSE	FALSE	FALSE	FALSE	FALSE	FALSE	FALSE	1025	1	Complication d'avortement provoqué	2014-09-17	Traitement médico-chirurgical	FALSE	FALSE	FALSE	FALSE	FALSE	FALSE	FALSE	FALSE	FALSE	FALSE	FALSE	FALSE	FALSE	FALSE
HGR de Bumbu	Quartiers excentriques et d'extension	2015-03-16	Quartiers excentriques et d'extension			Patiente venue d'elle même			2014-09-19										TRUE	FALSE	FALSE	FALSE	FALSE	FALSE	FALSE	FALSE	FALSE	FALSE	FALSE	FALSE	1026	1	Complication d'avortement provoqué	2014-09-19	Traitement médico-chirurgical	FALSE	FALSE	FALSE	FALSE	FALSE	FALSE	FALSE	FALSE	FALSE	FALSE	FALSE	FALSE	FALSE	FALSE
HGR de Bumbu	Quartiers excentriques et d'extension	2015-03-16	Quartiers résidentiels	32		Patiente venue d'elle même			2014-09-22										TRUE	FALSE	FALSE	FALSE	FALSE	FALSE	FALSE	FALSE	FALSE	FALSE	FALSE	FALSE	1027	1	Complication d'avortement provoqué	2014-09-22	Traitement médico-chirurgical	FALSE	FALSE	FALSE	FALSE	FALSE	FALSE	FALSE	FALSE	FALSE	FALSE	FALSE	FALSE	FALSE	FALSE
HGR de Bumbu	Quartiers excentriques et d'extension	2015-03-16	Quartiers excentriques et d'extension	30		Patiente venue d'elle même			2014-09-24										FALSE	TRUE	FALSE	FALSE	FALSE	FALSE	FALSE	FALSE	FALSE	FALSE	FALSE	FALSE	1028	1	Avortement spontané	2014-09-24	Traitement médico-chirurgical	FALSE	FALSE	FALSE	FALSE	FALSE	FALSE	FALSE	FALSE	FALSE	FALSE	FALSE	FALSE	FALSE	FALSE
HGR de Bumbu	Quartiers excentriques et d'extension	2015-03-16	Quartiers des cités planifiées	34		Patiente venue d'elle même			2014-09-25										TRUE	FALSE	FALSE	FALSE	FALSE	FALSE	FALSE	FALSE	FALSE	FALSE	FALSE	FALSE	1029	1	Complication d'avortement provoqué	2014-09-25	Traitement médico-chirurgical	FALSE	FALSE	TRUE	FALSE	FALSE	FALSE	FALSE	FALSE	FALSE	FALSE	FALSE	TRUE	FALSE	FALSE
HGR de Bumbu	Quartiers excentriques et d'extension	2015-03-16	Quartiers excentriques et d'extension	38		Patiente venue d'elle même			2014-10-17										FALSE	TRUE	FALSE	FALSE	FALSE	FALSE	FALSE	FALSE	FALSE	FALSE	FALSE	FALSE	1030	1	Avortement spontané	2014-10-17	Traitement médico-chirurgical	FALSE	FALSE	FALSE	FALSE	FALSE	FALSE	FALSE	FALSE	FALSE	FALSE	FALSE	FALSE	FALSE	FALSE
HGR de Bumbu	Quartiers excentriques et d'extension	2015-03-16	Quartiers excentriques et d'extension	35		Patiente venue d'elle même			2014-10-29										FALSE	TRUE	FALSE	FALSE	FALSE	FALSE	FALSE	FALSE	FALSE	FALSE	FALSE	FALSE	1031	1	Avortement spontané	2014-10-29	Traitement médico-chirurgical	FALSE	FALSE	FALSE	FALSE	FALSE	FALSE	FALSE	FALSE	FALSE	FALSE	FALSE	FALSE	FALSE	FALSE
HGR de Bumbu	Quartiers excentriques et d'extension	2015-03-16	Quartiers excentriques et d'extension	35		Patiente venue d'elle même			2014-01-05										TRUE	FALSE	FALSE	FALSE	FALSE	FALSE	FALSE	FALSE	FALSE	FALSE	FALSE	FALSE	1032	1	Complication d'avortement provoqué	2014-01-05	Traitement médico-chirurgical	FALSE	FALSE	FALSE	FALSE	TRUE	FALSE	FALSE	FALSE	TRUE	FALSE	FALSE	FALSE	FALSE	FALSE
HGR de Bumbu	Quartiers excentriques et d'extension	2015-03-16	Quartiers des cités planifiées	34		Patiente venue d'elle même			2014-11-15										TRUE	FALSE	FALSE	FALSE	FALSE	FALSE	FALSE	FALSE	FALSE	FALSE	FALSE	FALSE	1033	1	Complication d'avortement provoqué	2014-11-15	Traitement médico-chirurgical	FALSE	FALSE	TRUE	TRUE	FALSE	FALSE	FALSE	FALSE	FALSE	TRUE	FALSE	FALSE	FALSE	FALSE
HGR de Bumbu	Quartiers excentriques et d'extension	2015-03-16	Quartiers excentriques et d'extension	41		Patiente venue d'elle même			2014-11-18										TRUE	FALSE	FALSE	FALSE	FALSE	FALSE	FALSE	FALSE	FALSE	FALSE	FALSE	FALSE	1034	1	Complication d'avortement provoqué	2014-11-18	Traitement médico-chirurgical	FALSE	FALSE	TRUE	TRUE	FALSE	FALSE	FALSE	FALSE	TRUE	FALSE	FALSE	FALSE	FALSE	FALSE
HGR de Bumbu	Quartiers excentriques et d'extension	2015-03-16	Quartiers excentriques et d'extension	28		Patiente venue d'elle même			2014-11-22										TRUE	FALSE	FALSE	FALSE	FALSE	FALSE	FALSE	FALSE	FALSE	FALSE	FALSE	FALSE	1035	1	Complication d'avortement provoqué	2014-11-22	Traitement médico-chirurgical	FALSE	FALSE	TRUE	FALSE	FALSE	FALSE	TRUE	FALSE	TRUE	FALSE	FALSE	FALSE	FALSE	FALSE
HGR de Bumbu	Quartiers excentriques et d'extension	2015-03-16	Quartiers excentriques et d'extension	20		Patiente venue d'elle même			2014-11-27										TRUE	FALSE	FALSE	FALSE	FALSE	FALSE	FALSE	FALSE	FALSE	FALSE	FALSE	FALSE	1036	1	Complication d'avortement provoqué	2014-11-27	Traitement médico-chirurgical	FALSE	FALSE	TRUE	FALSE	FALSE	FALSE	FALSE	FALSE	FALSE	TRUE	FALSE	FALSE	FALSE	FALSE
HGR de Bumbu	Quartiers excentriques et d'extension	2015-03-16		22		Patiente venue d'elle même			2014-11-29										TRUE	FALSE	FALSE	FALSE	FALSE	FALSE	FALSE	FALSE	FALSE	FALSE	FALSE	FALSE	1037	1	Complication d'avortement provoqué	2014-11-29	Traitement médico-chirurgical	FALSE	FALSE	TRUE	FALSE	FALSE	FALSE	TRUE	FALSE	TRUE	FALSE	FALSE	TRUE	FALSE	FALSE
HGR de Bumbu	Quartiers excentriques et d'extension	2015-03-16				Patiente venue d'elle même			2014-12-11										FALSE	TRUE	FALSE	FALSE	FALSE	FALSE	FALSE	FALSE	FALSE	FALSE	FALSE	FALSE	1038	1	Avortement spontané	2014-12-11	Traitement médico-chirurgical	FALSE	FALSE	TRUE	TRUE	FALSE	FALSE	FALSE	FALSE	TRUE	FALSE	FALSE	FALSE	FALSE	FALSE
HGR de Bumbu	Quartiers excentriques et d'extension	2015-03-16	Quartiers excentriques et d'extension	21		Patiente venue d'elle même			2014-12-19										TRUE	FALSE	FALSE	FALSE	FALSE	FALSE	FALSE	FALSE	FALSE	FALSE	FALSE	FALSE	1039	1	Complication d'avortement provoqué	2014-12-19	Traitement médico-chirurgical	FALSE	FALSE	TRUE	TRUE	FALSE	FALSE	FALSE	FALSE	TRUE	FALSE	FALSE	FALSE	FALSE	FALSE
HGR de Bumbu	Quartiers excentriques et d'extension	2015-03-16		39		Patiente venue d'elle même			2014-12-26										FALSE	TRUE	FALSE	FALSE	FALSE	FALSE	FALSE	FALSE	FALSE	FALSE	FALSE	FALSE	1040	1	Avortement spontané	2014-12-26	Traitement médico-chirurgical	FALSE	FALSE	TRUE	TRUE	FALSE	FALSE	FALSE	FALSE	TRUE	FALSE	FALSE	FALSE	FALSE	FALSE
HGR de Bumbu	Quartiers excentriques et d'extension	2015-03-16	Quartiers excentriques et d'extension	31		Patiente venue d'elle même			2014-12-30										FALSE	TRUE	FALSE	FALSE	FALSE	FALSE	FALSE	FALSE	FALSE	FALSE	FALSE	FALSE	1041	1	Avortement spontané	2014-12-30	Traitement médico-chirurgical	FALSE	FALSE	TRUE	FALSE	FALSE	FALSE	TRUE	FALSE	TRUE	FALSE	FALSE	FALSE	FALSE	FALSE
HGR de Bumbu	Quartiers excentriques et d'extension	2015-03-16	Quartiers excentriques et d'extension	25		Patiente venue d'elle même			2014-12-30										TRUE	FALSE	FALSE	FALSE	FALSE	FALSE	FALSE	FALSE	FALSE	FALSE	FALSE	FALSE	1042	1	Complication d'avortement provoqué	2014-12-30	Traitement médico-chirurgical	FALSE	FALSE	TRUE	FALSE	FALSE	FALSE	TRUE	FALSE	TRUE	FALSE	FALSE	FALSE	FALSE	FALSE
HGR de Bumbu	Quartiers excentriques et d'extension	2015-02-10	Quartiers excentriques et d'extension	43		Patiente venue d'elle même			2014-06-15			150		90					FALSE	FALSE	FALSE	FALSE	TRUE	FALSE	FALSE	FALSE	FALSE	FALSE	FALSE	FALSE	1043	1	Autres diagnostics	2014-06-15	Traitement médico-chirurgical	TRUE	FALSE	FALSE	FALSE	FALSE	FALSE	FALSE	FALSE	FALSE	TRUE	FALSE	TRUE	FALSE	FALSE
HGR de Bumbu	Quartiers excentriques et d'extension	2015-02-10		34		Patiente venue d'elle même			2014-06-14	2014-06-14 03:30:00	36	130	3	70	2		0	80	FALSE	FALSE	FALSE	FALSE	FALSE	FALSE	FALSE	FALSE	FALSE	FALSE	FALSE	FALSE	1044	1	Autres diagnostics		Traitement médico-chirurgical	TRUE	FALSE	FALSE	FALSE	FALSE	FALSE	TRUE	FALSE	TRUE	FALSE	FALSE	TRUE	FALSE	FALSE
HGR de Bumbu	Quartiers excentriques et d'extension	2015-02-10		20		Patiente venue d'elle même			2014-06-21		38.5	120	1	70	0		0	76	FALSE	FALSE	FALSE	FALSE	TRUE	TRUE	FALSE	FALSE	TRUE	FALSE	FALSE	FALSE	1045	1	Autres diagnostics	2014-06-21	Traitement médico-chirurgical	FALSE	FALSE	TRUE	FALSE	FALSE	FALSE	TRUE	FALSE	TRUE	FALSE	FALSE	FALSE	FALSE	FALSE
HGR de Bumbu	Quartiers excentriques et d'extension	2015-02-10	Quartiers des cités planifiées	16	Celibataire	Patiente venue d'elle même			2014-05-31	2014-05-31 23:00:00	36.2	90	1	60	0		0	121	FALSE	FALSE	FALSE	FALSE	FALSE	FALSE	FALSE	FALSE	TRUE	TRUE	FALSE	FALSE	1046	1	Autres diagnostics	2014-05-31	Traitement médico-chirurgical	FALSE	FALSE	TRUE	FALSE	FALSE	FALSE	TRUE	FALSE	TRUE	FALSE	FALSE	TRUE	FALSE	FALSE
HGR de Bumbu	Quartiers excentriques et d'extension	2015-02-12		28		Patiente référée		2014-07-13	2014-07-13	2014-07-13 08:30:00	36	90	5	60	4		0	80	FALSE	FALSE	FALSE	FALSE	FALSE	FALSE	FALSE	FALSE	FALSE	FALSE	FALSE	FALSE	1047	1	Autres diagnostics	2014-07-13	Traitement médico-chirurgical	FALSE	FALSE	TRUE	TRUE	FALSE	FALSE	FALSE	FALSE	FALSE	FALSE	FALSE	TRUE	FALSE	FALSE
HGR de Bumbu	Quartiers excentriques et d'extension	2015-02-12	Quartiers excentriques et d'extension	34		Patiente venue d'elle même			2014-09-07	2014-09-07 10:00:00	36	90	5	70	4		0		FALSE	FALSE	FALSE	FALSE	FALSE	FALSE	FALSE	FALSE	TRUE	FALSE	FALSE	FALSE	1048	1	Autres diagnostics	2014-09-07	Traitement médico-chirurgical	FALSE	FALSE	TRUE	FALSE	FALSE	FALSE	TRUE	FALSE	FALSE	FALSE	FALSE	TRUE	FALSE	FALSE
HGR de Bumbu	Quartiers excentriques et d'extension	2015-02-12	Quartiers excentriques et d'extension	22		Patiente référée	Quartiers excentriques et d'extension	2014-09-12	2014-09-12	2014-09-12 14:00:00		100	4	60	3		0		FALSE	FALSE	FALSE	FALSE	FALSE	FALSE	FALSE	FALSE	FALSE	FALSE	FALSE	FALSE	1049	1	Autres diagnostics		Traitement médico-chirurgical	FALSE	TRUE	TRUE	FALSE	FALSE	FALSE	TRUE	FALSE	FALSE	TRUE	TRUE	FALSE	FALSE	FALSE
HGR de Bumbu	Quartiers excentriques et d'extension	2015-02-12		23	Mariée	Patiente venue d'elle même			2014-09-07	2014-09-07 15:30:00	36	110		70				80	FALSE	FALSE	FALSE	FALSE	FALSE	FALSE	FALSE	FALSE	FALSE	TRUE	FALSE	FALSE	1050	1	Autres diagnostics	2014-09-07	Traitement médico-chirurgical	FALSE	FALSE	TRUE	FALSE	FALSE	FALSE	TRUE	FALSE	TRUE	FALSE	FALSE	TRUE	FALSE	FALSE
HGR de Bumbu	Quartiers excentriques et d'extension	2015-02-12		17	Mariée	Patiente venue d'elle même			2014-09-08	2014-09-08 21:50:00			2		0		1		FALSE	FALSE	FALSE	FALSE	FALSE	FALSE	FALSE	FALSE	FALSE	TRUE	FALSE	FALSE	1051	1	Autres diagnostics	2014-09-08	Traitement médico-chirurgical	FALSE	FALSE	TRUE	FALSE	FALSE	FALSE	TRUE	FALSE	TRUE	FALSE	FALSE	FALSE	FALSE	FALSE
HGR de Bumbu	Quartiers excentriques et d'extension	2015-02-11	Quartiers des cités planifiées	40		Patiente référée	Quartiers excentriques et d'extension	2014-08-04	2014-08-04	2014-08-04 22:30:00		100	5	80	4		0		FALSE	FALSE	FALSE	TRUE	FALSE	FALSE	FALSE	FALSE	FALSE	FALSE	FALSE	FALSE	1052	1	Autres diagnostics	2014-08-04	Traitement médico-chirurgical	FALSE	FALSE	TRUE	FALSE	FALSE	FALSE	TRUE	FALSE	FALSE	FALSE	FALSE	FALSE	FALSE	FALSE
HGR de Bumbu	Quartiers excentriques et d'extension	2015-02-11	Quartiers excentriques et d'extension	27		Patiente venue d'elle même			2014-08-07	2014-08-07 22:30:00	36	100	6	60	4		1	78	FALSE	FALSE	FALSE	FALSE	FALSE	FALSE	FALSE	FALSE	FALSE	TRUE	FALSE	FALSE	1053	1	Autres diagnostics	2014-08-08	Traitement médico-chirurgical	FALSE	FALSE	TRUE	FALSE	FALSE	FALSE	TRUE	FALSE	TRUE	TRUE	FALSE	FALSE	FALSE	FALSE
HGR de Bumbu	Quartiers excentriques et d'extension	2015-02-11		29		Patiente venue d'elle même			2014-08-11				2		0		1		FALSE	FALSE	FALSE	FALSE	FALSE	FALSE	TRUE	FALSE	FALSE	TRUE	FALSE	FALSE	1054	1	Autres diagnostics	2014-08-11	Traitement médico-chirurgical	FALSE	FALSE	TRUE	FALSE	FALSE	FALSE	TRUE	FALSE	TRUE	FALSE	FALSE	FALSE	FALSE	FALSE
HGR de Bumbu	Quartiers excentriques et d'extension	2015-02-11	Quartiers des anciennes cités	37	Mariée	Patiente venue d'elle même			2014-08-18	2014-08-18 17:25:00	36	100	5	60	1		3	80	FALSE	FALSE	FALSE	FALSE	FALSE	FALSE	FALSE	FALSE	FALSE	TRUE	FALSE	FALSE	1055	1	Autres diagnostics	2014-08-18	Traitement médico-chirurgical	FALSE	FALSE	TRUE	FALSE	FALSE	FALSE	TRUE	FALSE	TRUE	FALSE	FALSE	FALSE	FALSE	FALSE
HGR de Bumbu	Quartiers excentriques et d'extension	2015-02-11	Quartiers des cités planifiées	26		Patiente venue d'elle même			2014-08-13	2014-08-13 02:00:00	36	100	3	70	2		0	80	FALSE	FALSE	FALSE	TRUE	FALSE	FALSE	TRUE	FALSE	FALSE	FALSE	FALSE	FALSE	1056	1	Autres diagnostics	2014-08-13	Traitement médico-chirurgical	FALSE	FALSE	TRUE	FALSE	FALSE	FALSE	TRUE	FALSE	TRUE	FALSE	FALSE	TRUE	FALSE	FALSE
HGR de Bumbu	Quartiers excentriques et d'extension	2015-02-11	Quartiers excentriques et d'extension	28		Patiente venue d'elle même			2014-08-12	2014-08-12 19:30:00	36	100	2	60	1		0		FALSE	FALSE	FALSE	TRUE	FALSE	FALSE	FALSE	FALSE	FALSE	FALSE	FALSE	FALSE	1057	1	Autres diagnostics	2014-08-12	Traitement médico-chirurgical	FALSE	FALSE	TRUE	FALSE	FALSE	FALSE	TRUE	FALSE	TRUE	TRUE	FALSE	TRUE	FALSE	FALSE
HGR de Bumbu	Quartiers excentriques et d'extension	2015-02-11	Quartiers excentriques et d'extension	20		Patiente venue d'elle même			2014-01-03	2014-01-03 07:40:00		110		70					FALSE	FALSE	FALSE	FALSE	FALSE	FALSE	FALSE	FALSE	FALSE	FALSE	FALSE	FALSE	1058	1	Autres diagnostics	2014-01-03	Traitement médico-chirurgical	FALSE	FALSE	TRUE	FALSE	FALSE	FALSE	TRUE	FALSE	TRUE	FALSE	FALSE	FALSE	FALSE	FALSE
HGR de Bumbu	Quartiers excentriques et d'extension	2015-02-11	Quartiers excentriques et d'extension	35		Patiente référée	Quartiers excentriques et d'extension	2014-07-27	2014-07-27	2014-07-27 17:00:00	36	120	5	80	4		0	80	FALSE	FALSE	FALSE	FALSE	FALSE	FALSE	FALSE	FALSE	FALSE	FALSE	FALSE	FALSE	1059	1	Autres diagnostics		Traitement médico-chirurgical	FALSE	FALSE	TRUE	FALSE	FALSE	FALSE	TRUE	FALSE	TRUE	FALSE	FALSE	FALSE	FALSE	FALSE
HGR de Bumbu	Quartiers excentriques et d'extension	2015-02-11	Quartiers excentriques et d'extension	20		Patiente référée	Quartiers excentriques et d'extension	2014-07-26	2014-07-27	2014-07-27	36	100	3	60	2		0	80	FALSE	FALSE	FALSE	FALSE	FALSE	FALSE	FALSE	FALSE	FALSE	TRUE	FALSE	FALSE	1060	1	Autres diagnostics		Traitement médico-chirurgical	FALSE	FALSE	TRUE	FALSE	FALSE	FALSE	TRUE	FALSE	TRUE	FALSE	FALSE	FALSE	FALSE	FALSE
HGR de Bumbu	Quartiers excentriques et d'extension	2015-02-11	Quartiers excentriques et d'extension	40		Patiente référée	Quartiers des cités planifiées	2014-07-20	2014-07-20				7		5		1		FALSE	FALSE	FALSE	FALSE	FALSE	FALSE	FALSE	FALSE	FALSE	FALSE	FALSE	FALSE	1061	1	Autres diagnostics	2014-07-20	Traitement médico-chirurgical	FALSE	FALSE	TRUE	FALSE	FALSE	FALSE	TRUE	FALSE	TRUE	FALSE	FALSE	TRUE	FALSE	TRUE
HGR de Bumbu	Quartiers excentriques et d'extension	2015-02-11	Quartiers excentriques et d'extension	40	Mariée	Patiente venue d'elle même			2014-08-12	2014-08-12	36	110	2	90	0		1	80	FALSE	FALSE	FALSE	FALSE	FALSE	FALSE	TRUE	FALSE	FALSE	FALSE	FALSE	FALSE	1062	1	Autres diagnostics	2014-08-12	Traitement médico-chirurgical	FALSE	FALSE	TRUE	FALSE	FALSE	FALSE	TRUE	FALSE	TRUE	FALSE	FALSE	FALSE	FALSE	FALSE
HGR de Bumbu	Quartiers excentriques et d'extension	2015-02-11	Quartiers excentriques et d'extension	36	Mariée	Patiente venue d'elle même			2014-08-19	2014-08-19 23:45:00			4		3		0		FALSE	FALSE	FALSE	TRUE	FALSE	FALSE	FALSE	FALSE	FALSE	FALSE	FALSE	FALSE	1063	1	Autres diagnostics	2014-08-19	Traitement médico-chirurgical	FALSE	FALSE	FALSE	FALSE	TRUE	FALSE	TRUE	FALSE	TRUE	FALSE	FALSE	TRUE	FALSE	FALSE
HGR de Bumbu	Quartiers excentriques et d'extension	2015-02-11	Quartiers excentriques et d'extension	28		Patiente venue d'elle même			2014-08-06	2014-08-06 20:10:00	36	100	7	60	3		2		FALSE	FALSE	FALSE	FALSE	FALSE	FALSE	FALSE	FALSE	FALSE	FALSE	FALSE	FALSE	1064	1	Autres diagnostics	2014-08-06	Traitement médico-chirurgical	FALSE	FALSE	TRUE	FALSE	FALSE	FALSE	TRUE	FALSE	TRUE	FALSE	FALSE	TRUE	FALSE	FALSE
HGR de Bumbu	Quartiers excentriques et d'extension	2015-02-11	Quartiers excentriques et d'extension	25		Patiente venue d'elle même			2014-06-19	2014-06-19 06:30:00	36	100	1	60	0		0	78	FALSE	FALSE	FALSE	TRUE	FALSE	FALSE	FALSE	FALSE	FALSE	FALSE	FALSE	FALSE	1065	1	Autres diagnostics	2014-06-19	Traitement médico-chirurgical	FALSE	FALSE	TRUE	TRUE	FALSE	FALSE	TRUE	FALSE	FALSE	FALSE	FALSE	FALSE	FALSE	FALSE
HGR de Bumbu	Quartiers excentriques et d'extension	2015-02-11	Quartiers excentriques et d'extension	23	Mariée	Patiente référée	Quartiers des anciennes cités	2014-06-13	2014-06-13	2014-06-13 21:50:00	36	110	1	80	0		0	80	FALSE	FALSE	FALSE	FALSE	FALSE	FALSE	FALSE	FALSE	FALSE	TRUE	FALSE	FALSE	1066	1	Autres diagnostics	2014-06-13	Traitement médico-chirurgical	FALSE	FALSE	TRUE	FALSE	FALSE	FALSE	TRUE	FALSE	TRUE	FALSE	FALSE	FALSE	FALSE	FALSE
HGR de Bumbu	Quartiers excentriques et d'extension	2015-02-11	Quartiers excentriques et d'extension	14		Patiente référée	Quartiers excentriques et d'extension	2014-06-23	2014-06-23	2014-06-23 21:40:00	36	110	1	70	0		0	80	FALSE	FALSE	FALSE	FALSE	FALSE	FALSE	FALSE	FALSE	FALSE	FALSE	FALSE	FALSE	1067	1	Autres diagnostics	2014-06-23	Traitement médico-chirurgical	FALSE	FALSE	FALSE	FALSE	FALSE	FALSE	FALSE	FALSE	FALSE	FALSE	FALSE	FALSE	FALSE	FALSE
HGR de Bumbu	Quartiers excentriques et d'extension	2015-02-11	Quartiers excentriques et d'extension	44		Patiente venue d'elle même			2014-06-27	2014-06-27 07:10:00	36	150	1	80	0		0	80	FALSE	FALSE	FALSE	FALSE	TRUE	FALSE	FALSE	FALSE	FALSE	FALSE	FALSE	FALSE	1068	1	Autres diagnostics	2014-06-27	Traitement médico-chirurgical	FALSE	FALSE	TRUE	FALSE	FALSE	FALSE	TRUE	FALSE	TRUE	TRUE	FALSE	FALSE	FALSE	FALSE
HGR de Bumbu	Quartiers excentriques et d'extension	2015-02-11	Quartiers excentriques et d'extension	38	Mariée	Patiente venue d'elle même			2014-07-06	2014-07-06 18:00:00	36	120	7	80	3		3	80	FALSE	FALSE	FALSE	FALSE	TRUE	FALSE	FALSE	FALSE	FALSE	FALSE	FALSE	FALSE	1069	1	Autres diagnostics	2014-07-06	Traitement médico-chirurgical	FALSE	FALSE	TRUE	FALSE	FALSE	FALSE	TRUE	TRUE	FALSE	FALSE	FALSE	TRUE	FALSE	FALSE
HGR de Bumbu	Quartiers excentriques et d'extension	2015-02-11	Quartiers excentriques et d'extension	35		Patiente référée	Quartiers excentriques et d'extension	2014-06-19	2014-06-19	2014-06-19 14:30:00	36	120	5	80	4		0		FALSE	FALSE	FALSE	FALSE	FALSE	FALSE	TRUE	FALSE	TRUE	TRUE	FALSE	FALSE	1070	1	Autres diagnostics	2014-06-19	Traitement médico-chirurgical	FALSE	FALSE	TRUE	FALSE	FALSE	FALSE	TRUE	FALSE	TRUE	FALSE	FALSE	TRUE	FALSE	FALSE
HGR de Bumbu	Quartiers excentriques et d'extension	2015-02-11	Quartiers excentriques et d'extension	38		Patiente venue d'elle même			2014-07-08	2014-07-08 21:15:00	37.7	100	3	60	0		2	90	FALSE	FALSE	FALSE	FALSE	FALSE	FALSE	FALSE	FALSE	FALSE	FALSE	FALSE	FALSE	1071	1	Autres diagnostics	2014-07-09	Traitement médico-chirurgical	FALSE	FALSE	TRUE	FALSE	FALSE	FALSE	FALSE	FALSE	FALSE	TRUE	FALSE	FALSE	FALSE	FALSE
HGR de Bumbu	Quartiers excentriques et d'extension	2015-02-11	Quartiers excentriques et d'extension	20		Patiente venue d'elle même			2014-06-21	2014-06-21 05:00:00	36	100	1	60	0		0	80	FALSE	FALSE	FALSE	FALSE	FALSE	FALSE	FALSE	FALSE	FALSE	FALSE	FALSE	FALSE	1072	1	Autres diagnostics	2014-06-21	Traitement médico-chirurgical	FALSE	FALSE	FALSE	FALSE	TRUE	FALSE	TRUE	FALSE	TRUE	FALSE	FALSE	TRUE	FALSE	FALSE
HGR de Bumbu	Quartiers excentriques et d'extension	2015-02-11	Quartiers excentriques et d'extension	18		Patiente référée	Quartiers excentriques et d'extension	2014-05-23	2014-05-23	2014-05-23 13:00:00	36	160	1	110	0		0	80	FALSE	FALSE	FALSE	FALSE	TRUE	FALSE	FALSE	FALSE	FALSE	FALSE	FALSE	FALSE	1073	1	Autres diagnostics	2014-05-23	Traitement médico-chirurgical	FALSE	FALSE	TRUE	FALSE	FALSE	FALSE	TRUE	TRUE	TRUE	FALSE	FALSE	FALSE	FALSE	FALSE
HGR de Bumbu	Quartiers excentriques et d'extension	2015-02-11	Quartiers des cités planifiées	25		Patiente venue d'elle même			2014-07-28		36.8	110	1	80	0		0		FALSE	FALSE	FALSE	FALSE	TRUE	FALSE	FALSE	FALSE	FALSE	FALSE	FALSE	FALSE	1074	1	Autres diagnostics	2014-07-28	Traitement médico-chirurgical	FALSE	FALSE	TRUE	FALSE	FALSE	FALSE	TRUE	FALSE	TRUE	FALSE	FALSE	TRUE	FALSE	FALSE
HGR de Bumbu	Quartiers excentriques et d'extension	2015-02-11	Quartiers excentriques et d'extension	32		Patiente venue d'elle même			2014-07-21	2014-07-21	36	100	7	70	4		2		FALSE	FALSE	FALSE	FALSE	FALSE	FALSE	FALSE	FALSE	FALSE	FALSE	FALSE	FALSE	1075	1	Autres diagnostics	2014-07-21	Traitement médico-chirurgical	FALSE	FALSE	TRUE	FALSE	FALSE	FALSE	TRUE	FALSE	TRUE	FALSE	FALSE	TRUE	FALSE	FALSE
HGR de Bumbu	Quartiers excentriques et d'extension	2015-02-11	Quartiers excentriques et d'extension	31		Patiente venue d'elle même			2014-07-12	2014-07-12 09:50:00	36	100	4	60	2		1	80	FALSE	FALSE	FALSE	FALSE	FALSE	FALSE	FALSE	FALSE	TRUE	FALSE	FALSE	FALSE	1076	1	Autres diagnostics	2014-07-12	Traitement médico-chirurgical	FALSE	FALSE	TRUE	FALSE	FALSE	FALSE	TRUE	FALSE	TRUE	FALSE	FALSE	TRUE	FALSE	FALSE
HGR de Bumbu	Quartiers excentriques et d'extension	2015-02-12	Quartiers des cités planifiées	48		Patiente venue d'elle même			2014-10-09			110		80		22		84	FALSE	FALSE	FALSE	FALSE	FALSE	FALSE	FALSE	FALSE	FALSE	FALSE	FALSE	FALSE	1077	1	Autres diagnostics	2014-10-09	Traitement médico-chirurgical	FALSE	FALSE	FALSE	FALSE	FALSE	FALSE	FALSE	FALSE	FALSE	FALSE	FALSE	FALSE	FALSE	FALSE
HGR de Bumbu	Quartiers excentriques et d'extension	2015-02-12		28		Patiente référée	Quartiers excentriques et d'extension	2014-10-08	2014-10-08	2014-10-08 05:00:00	38	130	2	70	1		0		FALSE	FALSE	FALSE	FALSE	TRUE	TRUE	FALSE	FALSE	FALSE	TRUE	FALSE	FALSE	1078	1	Autres diagnostics	2014-10-08	Traitement médico-chirurgical	TRUE	FALSE	FALSE	FALSE	FALSE	FALSE	TRUE	TRUE	TRUE	TRUE	FALSE	FALSE	FALSE	FALSE
HGR de Bumbu	Quartiers excentriques et d'extension	2015-02-12		16		Patiente venue d'elle même			2014-09-21		36	100		60				80	FALSE	FALSE	FALSE	FALSE	FALSE	FALSE	FALSE	FALSE	FALSE	FALSE	FALSE	FALSE	1079	1	Autres diagnostics	2014-09-21	Traitement médico-chirurgical	FALSE	FALSE	TRUE	FALSE	FALSE	FALSE	TRUE	FALSE	TRUE	FALSE	FALSE	TRUE	FALSE	FALSE
HGR de Bumbu	Quartiers excentriques et d'extension	2015-02-12		37		Patiente référée	Quartiers excentriques et d'extension	2014-09-30	2014-09-30	2014-09-30 21:00:00	36	100	2	60	1		0	80	FALSE	FALSE	FALSE	FALSE	FALSE	FALSE	FALSE	FALSE	TRUE	TRUE	FALSE	FALSE	1080	1	Autres diagnostics	2014-09-30	Traitement médico-chirurgical	FALSE	FALSE	TRUE	FALSE	FALSE	FALSE	TRUE	FALSE	TRUE	FALSE	FALSE	TRUE	FALSE	FALSE
HGR de Bumbu	Quartiers excentriques et d'extension	2015-02-12	Quartiers excentriques et d'extension	22		Patiente venue d'elle même			2014-09-03	2014-09-03 22:40:00		180	1	100	0		0		FALSE	FALSE	FALSE	FALSE	TRUE	FALSE	FALSE	FALSE	FALSE	FALSE	FALSE	FALSE	1081	1	Autres diagnostics	2014-09-03	Traitement médico-chirurgical	FALSE	FALSE	TRUE	FALSE	FALSE	FALSE	TRUE	FALSE	TRUE	FALSE	FALSE	TRUE	FALSE	FALSE
HGR de Bumbu	Quartiers excentriques et d'extension	2015-02-12		36		Patiente venue d'elle même			2014-09-27	2014-09-27 10:00:00		110	2	80	1	20	0	68	FALSE	FALSE	FALSE	TRUE	FALSE	FALSE	FALSE	FALSE	TRUE	FALSE	FALSE	FALSE	1082	1	Autres diagnostics	2014-09-27	Traitement médico-chirurgical	FALSE	FALSE	TRUE	FALSE	FALSE	FALSE	TRUE	FALSE	TRUE	FALSE	FALSE	TRUE	FALSE	FALSE
HGR de Bumbu	Quartiers excentriques et d'extension	2015-02-12	Quartiers des cités planifiées	32	Mariée	Patiente venue d'elle même			2014-09-21				2		1		0		FALSE	FALSE	FALSE	FALSE	FALSE	FALSE	FALSE	FALSE	FALSE	FALSE	FALSE	FALSE	1083	1	Autres diagnostics	2014-09-21	Traitement médico-chirurgical	FALSE	FALSE	TRUE	FALSE	FALSE	FALSE	TRUE	FALSE	TRUE	FALSE	FALSE	TRUE	FALSE	FALSE
HGR de Bumbu	Quartiers excentriques et d'extension	2015-02-12		26		Patiente venue d'elle même			2014-09-26										FALSE	FALSE	FALSE	FALSE	FALSE	FALSE	FALSE	FALSE	FALSE	FALSE	FALSE	FALSE	1084	1	Autres diagnostics	2014-09-26	Traitement médico-chirurgical	FALSE	FALSE	TRUE	FALSE	FALSE	FALSE	FALSE	FALSE	TRUE	FALSE	FALSE	TRUE	FALSE	FALSE
HGR de Bumbu	Quartiers excentriques et d'extension	2015-02-12		18		Patiente référée	Quartiers excentriques et d'extension	2014-09-19	2014-09-19	2014-09-19 08:50:00	36	110	2	80	0		1		FALSE	FALSE	FALSE	FALSE	FALSE	FALSE	FALSE	FALSE	TRUE	FALSE	FALSE	FALSE	1085	1	Autres diagnostics	2014-09-19	Traitement médico-chirurgical	FALSE	FALSE	TRUE	TRUE	FALSE	FALSE	TRUE	FALSE	TRUE	FALSE	FALSE	TRUE	FALSE	FALSE
HGR de Bumbu	Quartiers excentriques et d'extension	2015-02-12	Quartiers des cités planifiées	35		Patiente venue d'elle même			2014-10-05	2014-10-05 22:45:00	36	110	3	70	1		1	80	FALSE	FALSE	FALSE	FALSE	FALSE	FALSE	FALSE	FALSE	TRUE	FALSE	FALSE	FALSE	1086	1	Autres diagnostics	2014-10-06	Traitement médico-chirurgical	FALSE	FALSE	TRUE	FALSE	FALSE	FALSE	TRUE	FALSE	TRUE	FALSE	FALSE	TRUE	FALSE	FALSE
HGR de Bumbu	Quartiers excentriques et d'extension	2015-02-12	Quartiers excentriques et d'extension	18		Patiente venue d'elle même			2014-10-04	2014-10-04 20:45:00	36	170	1	100	0		0	80	FALSE	FALSE	FALSE	FALSE	TRUE	FALSE	FALSE	FALSE	TRUE	FALSE	FALSE	FALSE	1087	1	Autres diagnostics	2014-10-04	Traitement médico-chirurgical	FALSE	FALSE	TRUE	FALSE	FALSE	FALSE	TRUE	TRUE	TRUE	TRUE	FALSE	TRUE	FALSE	FALSE
HGR de Bumbu	Quartiers excentriques et d'extension	2015-02-12	Quartiers excentriques et d'extension	31		Patiente référée	Quartiers excentriques et d'extension	2014-10-08	2014-10-08	2014-10-08 09:00:00			5		4		0		FALSE	FALSE	FALSE	FALSE	TRUE	FALSE	FALSE	FALSE	TRUE	FALSE	FALSE	FALSE	1088	1	Autres diagnostics	2014-10-08	Traitement médico-chirurgical	FALSE	FALSE	TRUE	FALSE	FALSE	FALSE	TRUE	TRUE	TRUE	FALSE	FALSE	TRUE	FALSE	FALSE
HGR de Bumbu	Quartiers excentriques et d'extension	2015-02-12		29		Patiente venue d'elle même			2014-10-11	2014-10-11 06:00:00	36	120	2	80	1		0	80	FALSE	FALSE	FALSE	TRUE	FALSE	FALSE	FALSE	FALSE	FALSE	FALSE	FALSE	FALSE	1089	1	Autres diagnostics	2014-10-11	Traitement médico-chirurgical	FALSE	FALSE	TRUE	FALSE	FALSE	FALSE	TRUE	FALSE	TRUE	FALSE	FALSE	TRUE	FALSE	TRUE
HGR de Bumbu	Quartiers excentriques et d'extension	2015-02-12	Quartiers excentriques et d'extension	23		Patiente venue d'elle même			2014-11-01	2014-11-01 22:40:00	36		4		2		1	80	FALSE	FALSE	FALSE	FALSE	FALSE	FALSE	FALSE	FALSE	FALSE	FALSE	FALSE	FALSE	1090	1	Autres diagnostics	2014-11-01	Traitement médico-chirurgical	FALSE	FALSE	TRUE	FALSE	FALSE	FALSE	TRUE	FALSE	TRUE	FALSE	FALSE	TRUE	FALSE	FALSE
HGR de Bumbu	Quartiers excentriques et d'extension	2015-02-12	Quartiers excentriques et d'extension	35	Mariée	Patiente venue d'elle même			2014-10-25	2014-10-25 13:00:00			5		2		2		FALSE	FALSE	FALSE	FALSE	FALSE	FALSE	FALSE	FALSE	FALSE	TRUE	FALSE	FALSE	1091	1	Autres diagnostics	2014-10-25	Traitement médico-chirurgical	FALSE	FALSE	TRUE	FALSE	FALSE	FALSE	TRUE	FALSE	TRUE	FALSE	FALSE	TRUE	FALSE	FALSE
HGR de Bumbu	Quartiers excentriques et d'extension	2015-02-12	Quartiers excentriques et d'extension	37		Patiente référée		2014-10-26	2014-10-26		36	90	6	60	1		4		FALSE	FALSE	FALSE	FALSE	FALSE	FALSE	FALSE	FALSE	FALSE	FALSE	FALSE	FALSE	1092	1	Autres diagnostics	2014-10-26	Traitement médico-chirurgical	FALSE	FALSE	TRUE	FALSE	FALSE	FALSE	TRUE	FALSE	TRUE	FALSE	FALSE	TRUE	FALSE	TRUE
HGR de Bumbu	Quartiers excentriques et d'extension	2015-02-12	Quartiers excentriques et d'extension	23		Patiente référée		2014-10-10	2014-10-10	2014-10-10 06:15:00	36.2	110	3	60	2		0		FALSE	FALSE	FALSE	FALSE	FALSE	FALSE	FALSE	FALSE	FALSE	FALSE	FALSE	FALSE	1093	1	Autres diagnostics	2014-10-10	Traitement médico-chirurgical	FALSE	FALSE	TRUE	FALSE	FALSE	FALSE	TRUE	FALSE	TRUE	FALSE	FALSE	TRUE	FALSE	FALSE
HGR de Bumbu	Quartiers excentriques et d'extension	2015-02-12		36		Patiente venue d'elle même			2014-12-16	2014-12-16 16:24:00			5		4		0		FALSE	FALSE	FALSE	TRUE	FALSE	FALSE	FALSE	FALSE	FALSE	FALSE	FALSE	FALSE	1094	1	Autres diagnostics	2014-12-16	Traitement médico-chirurgical	FALSE	FALSE	FALSE	FALSE	TRUE	FALSE	TRUE	FALSE	TRUE	FALSE	FALSE	FALSE	FALSE	FALSE
HGR de Bumbu	Quartiers excentriques et d'extension	2015-02-12	Quartiers semi-ruraux	33	Mariée	Patiente venue d'elle même			2014-10-02	2014-10-02 11:30:00			2		1		0		FALSE	FALSE	FALSE	TRUE	FALSE	FALSE	FALSE	FALSE	FALSE	FALSE	FALSE	FALSE	1095	1	Autres diagnostics	2014-10-02	Traitement médico-chirurgical	FALSE	FALSE	TRUE	FALSE	FALSE	FALSE	TRUE	FALSE	TRUE	FALSE	FALSE	TRUE	FALSE	FALSE
HGR de Bumbu	Quartiers excentriques et d'extension	2015-02-12	Quartiers excentriques et d'extension	26		Patiente référée	Quartiers excentriques et d'extension	2014-10-18	2014-10-18	2014-10-18 17:00:00		180	3	110	0		2	80	FALSE	FALSE	FALSE	FALSE	TRUE	FALSE	FALSE	FALSE	TRUE	FALSE	FALSE	FALSE	1096	1	Autres diagnostics	2014-10-18	Traitement médico-chirurgical	FALSE	FALSE	TRUE	FALSE	FALSE	FALSE	TRUE	FALSE	TRUE	FALSE	FALSE	TRUE	FALSE	FALSE
HGR de Bumbu	Quartiers excentriques et d'extension	2015-02-12	Quartiers excentriques et d'extension	21		Patiente référée	Quartiers excentriques et d'extension	2014-09-28	2014-09-28	2014-09-28 18:00:00	37	140	4	70	3		0		FALSE	FALSE	FALSE	FALSE	FALSE	FALSE	FALSE	FALSE	FALSE	TRUE	FALSE	FALSE	1097	1	Autres diagnostics	2014-09-28	Traitement médico-chirurgical	FALSE	FALSE	TRUE	FALSE	FALSE	FALSE	TRUE	FALSE	TRUE	FALSE	FALSE	FALSE	FALSE	FALSE
HGR de Bumbu	Quartiers excentriques et d'extension	2015-02-12		18		Patiente référée	Quartiers excentriques et d'extension	2014-08-27	2014-08-27	2014-08-27 13:30:00	36.5	120	1	80	0		0		FALSE	FALSE	FALSE	FALSE	FALSE	FALSE	FALSE	FALSE	TRUE	FALSE	FALSE	FALSE	1098	1	Autres diagnostics	2014-08-27	Traitement médico-chirurgical	FALSE	FALSE	TRUE	FALSE	FALSE	FALSE	TRUE	FALSE	TRUE	FALSE	FALSE	TRUE	FALSE	FALSE
HGR de Bumbu	Quartiers excentriques et d'extension	2015-02-12	Quartiers excentriques et d'extension	19		Patiente référée	Quartiers excentriques et d'extension	2014-08-28	2014-08-28	2014-08-28 21:43:00			1		0		0		FALSE	FALSE	FALSE	FALSE	FALSE	FALSE	FALSE	FALSE	FALSE	FALSE	FALSE	FALSE	1099	1	Autres diagnostics	2014-08-28	Traitement médico-chirurgical	FALSE	FALSE	TRUE	FALSE	FALSE	FALSE	TRUE	FALSE	TRUE	FALSE	FALSE	TRUE	FALSE	FALSE
HGR de Bumbu	Quartiers excentriques et d'extension	2015-02-12	Quartiers excentriques et d'extension	33	Mariée	Patiente venue d'elle même			2014-09-04				2		1		0		FALSE	FALSE	FALSE	FALSE	FALSE	FALSE	FALSE	FALSE	FALSE	FALSE	FALSE	FALSE	1100	1	Autres diagnostics	2014-09-04	Traitement médico-chirurgical	FALSE	FALSE	TRUE	FALSE	FALSE	FALSE	TRUE	FALSE	TRUE	FALSE	FALSE	TRUE	FALSE	FALSE
HGR de Bumbu	Quartiers excentriques et d'extension	2015-02-12	Quartiers excentriques et d'extension	40		Patiente venue d'elle même			2014-09-10	2014-09-10 14:55:00		90	4	50	3		0		FALSE	FALSE	FALSE	FALSE	FALSE	FALSE	FALSE	FALSE	FALSE	TRUE	FALSE	FALSE	1101	1	Autres diagnostics	2014-09-10	Traitement médico-chirurgical	FALSE	FALSE	TRUE	FALSE	FALSE	FALSE	TRUE	FALSE	TRUE	FALSE	FALSE	TRUE	FALSE	FALSE
HGR de Bumbu	Quartiers excentriques et d'extension	2015-02-12	Quartiers excentriques et d'extension	23		Patiente venue d'elle même			2014-09-19	2014-09-19 19:30:00	36.5		1		0		0		FALSE	FALSE	FALSE	FALSE	FALSE	FALSE	FALSE	FALSE	FALSE	FALSE	FALSE	FALSE	1102	1	Autres diagnostics	2014-09-19	Traitement médico-chirurgical	FALSE	FALSE	TRUE	FALSE	FALSE	FALSE	TRUE	FALSE	TRUE	FALSE	FALSE	FALSE	FALSE	FALSE
HGR de Bumbu	Quartiers excentriques et d'extension	2015-02-12	Quartiers résidentiels	32		Patiente venue d'elle même			2014-08-13	2014-08-13 10:00:00	36	100	4	70	3		0	80	FALSE	FALSE	FALSE	TRUE	TRUE	FALSE	FALSE	FALSE	FALSE	FALSE	FALSE	FALSE	1103	1	Autres diagnostics	2014-08-13	Traitement médico-chirurgical	FALSE	FALSE	TRUE	FALSE	FALSE	FALSE	TRUE	FALSE	TRUE	FALSE	FALSE	FALSE	FALSE	FALSE
HGR de Bumbu	Quartiers excentriques et d'extension	2015-02-12	Quartiers excentriques et d'extension	28		Patiente venue d'elle même			2014-09-19	2014-09-19 23:30:00	36	100	1	60	0		0	80	FALSE	FALSE	FALSE	FALSE	FALSE	FALSE	FALSE	FALSE	FALSE	FALSE	FALSE	FALSE	1104	1	Autres diagnostics	2014-09-23	Traitement médico-chirurgical	FALSE	FALSE	TRUE	FALSE	FALSE	FALSE	TRUE	FALSE	TRUE	FALSE	FALSE	TRUE	FALSE	TRUE
HGR de Bumbu	Quartiers excentriques et d'extension	2015-02-12	Quartiers excentriques et d'extension	27		Patiente venue d'elle même			2014-09-26	2014-09-26 10:45:00	36	120	1	70	0		0	80	FALSE	FALSE	FALSE	FALSE	FALSE	FALSE	FALSE	FALSE	TRUE	FALSE	FALSE	FALSE	1105	1	Autres diagnostics	2014-09-26	Traitement médico-chirurgical	FALSE	FALSE	TRUE	FALSE	FALSE	FALSE	TRUE	FALSE	TRUE	FALSE	FALSE	TRUE	FALSE	FALSE
HGR de Bumbu	Quartiers excentriques et d'extension	2015-02-12	Quartiers excentriques et d'extension	18		Patiente référée	Quartiers excentriques et d'extension	2014-09-17	2014-09-17	2014-09-17 08:00:00		200	2	100	0		1		FALSE	FALSE	FALSE	FALSE	TRUE	FALSE	FALSE	FALSE	FALSE	FALSE	FALSE	FALSE	1106	1	Autres diagnostics	2014-09-17	Traitement médico-chirurgical	FALSE	FALSE	TRUE	FALSE	FALSE	FALSE	TRUE	TRUE	FALSE	TRUE	FALSE	FALSE	FALSE	FALSE
HGR de Bumbu	Quartiers excentriques et d'extension	2015-02-13		14		Patiente référée	Quartiers excentriques et d'extension	2014-10-12	2014-10-12				1		0		0		FALSE	FALSE	FALSE	FALSE	TRUE	FALSE	FALSE	FALSE	TRUE	FALSE	FALSE	FALSE	1107	1	Autres diagnostics	2014-10-12	Traitement médico-chirurgical	FALSE	FALSE	TRUE	FALSE	FALSE	FALSE	TRUE	FALSE	TRUE	FALSE	FALSE	TRUE	FALSE	FALSE
HGR de Bumbu	Quartiers excentriques et d'extension	2015-02-13	Quartiers excentriques et d'extension	31		Patiente venue d'elle même			2014-12-16	2014-12-16 15:00:00	36		2		0		1	80	FALSE	FALSE	FALSE	FALSE	FALSE	FALSE	FALSE	FALSE	FALSE	TRUE	FALSE	FALSE	1108	1	Autres diagnostics	2014-12-16	Traitement médico-chirurgical	FALSE	FALSE	TRUE	FALSE	FALSE	FALSE	TRUE	FALSE	TRUE	FALSE	FALSE	TRUE	FALSE	FALSE
HGR de Bumbu	Quartiers excentriques et d'extension	2015-02-13	Quartiers excentriques et d'extension	24		Patiente venue d'elle même			2014-12-18	2014-12-18 18:00:00	36	120	4	90	3		0	80	FALSE	FALSE	FALSE	FALSE	FALSE	FALSE	FALSE	FALSE	FALSE	TRUE	FALSE	FALSE	1109	1	Autres diagnostics	2014-12-19	Traitement médico-chirurgical	FALSE	FALSE	TRUE	FALSE	FALSE	FALSE	TRUE	FALSE	TRUE	FALSE	FALSE	TRUE	FALSE	FALSE
HGR de Bumbu	Quartiers excentriques et d'extension	2015-02-13	Quartiers excentriques et d'extension	33		Patiente référée		2014-11-28	2014-11-28			120	4	60	3		0		FALSE	FALSE	FALSE	FALSE	FALSE	FALSE	FALSE	FALSE	FALSE	FALSE	FALSE	FALSE	1110	1	Autres diagnostics	2014-11-28	Traitement médico-chirurgical	FALSE	FALSE	TRUE	FALSE	FALSE	FALSE	TRUE	FALSE	TRUE	TRUE	FALSE	TRUE	TRUE	TRUE
HGR de Bumbu	Quartiers excentriques et d'extension	2015-02-13	Quartiers résidentiels	24		Patiente venue d'elle même			2014-12-24	2014-12-24 10:00:00			3		2		0		FALSE	FALSE	FALSE	TRUE	FALSE	FALSE	FALSE	FALSE	FALSE	FALSE	FALSE	FALSE	1111	1	Autres diagnostics	2014-12-24	Traitement médico-chirurgical	FALSE	FALSE	TRUE	FALSE	FALSE	FALSE	TRUE	FALSE	TRUE	FALSE	FALSE	TRUE	TRUE	TRUE
HGR de Bumbu	Quartiers excentriques et d'extension	2015-02-13	Quartiers des cités planifiées	30	Mariée	Patiente venue d'elle même			2014-11-21	2014-11-21 06:00:00			4		0		3		FALSE	FALSE	FALSE	FALSE	FALSE	FALSE	FALSE	FALSE	FALSE	FALSE	FALSE	FALSE	1112	1	Autres diagnostics	2014-11-21	Traitement médico-chirurgical	TRUE	FALSE	FALSE	FALSE	FALSE	FALSE	TRUE	FALSE	TRUE	FALSE	FALSE	TRUE	FALSE	FALSE
HGR de Bumbu	Quartiers excentriques et d'extension	2015-02-13	Quartiers semi-ruraux	38		Patiente venue d'elle même			2014-11-30	2014-11-30 05:30:00	36	110	3	70	2		0	80	FALSE	FALSE	FALSE	TRUE	FALSE	FALSE	FALSE	FALSE	FALSE	FALSE	FALSE	FALSE	1113	1	Autres diagnostics	2014-11-30	Traitement médico-chirurgical	FALSE	FALSE	TRUE	FALSE	FALSE	FALSE	TRUE	FALSE	TRUE	FALSE	FALSE	FALSE	TRUE	TRUE
HGR de Bumbu	Quartiers excentriques et d'extension	2015-02-13	Quartiers excentriques et d'extension	37	Mariée	Patiente venue d'elle même			2014-11-12	2014-11-12 03:20:00	37	100	5	60	3		1	80	FALSE	FALSE	FALSE	FALSE	FALSE	FALSE	FALSE	FALSE	FALSE	FALSE	FALSE	FALSE	1114	1	Autres diagnostics	2014-11-12	Traitement médico-chirurgical	FALSE	FALSE	TRUE	FALSE	FALSE	FALSE	TRUE	FALSE	TRUE	FALSE	FALSE	TRUE	FALSE	TRUE
HGR de Bumbu	Quartiers excentriques et d'extension	2015-02-13	Quartiers excentriques et d'extension	29		Patiente venue d'elle même			2014-12-06	2014-12-06 20:45:00			8		3		4		FALSE	FALSE	FALSE	TRUE	FALSE	FALSE	FALSE	FALSE	FALSE	FALSE	FALSE	FALSE	1115	1	Autres diagnostics	2014-12-06	Traitement médico-chirurgical	FALSE	FALSE	TRUE	FALSE	FALSE	FALSE	TRUE	FALSE	TRUE	FALSE	FALSE	TRUE	FALSE	FALSE
HGR de Bumbu	Quartiers excentriques et d'extension	2015-02-13	Quartiers excentriques et d'extension	27		Patiente référée	Quartiers excentriques et d'extension	2014-12-22	2014-12-22	2014-12-22 20:50:00	36	90	1	60	0		0	80	FALSE	FALSE	FALSE	FALSE	FALSE	FALSE	FALSE	FALSE	FALSE	FALSE	FALSE	FALSE	1116	1	Autres diagnostics	2014-12-22	Traitement médico-chirurgical	FALSE	FALSE	TRUE	FALSE	FALSE	FALSE	TRUE	FALSE	TRUE	FALSE	FALSE	TRUE	FALSE	FALSE
HGR de Bumbu	Quartiers excentriques et d'extension	2015-02-13		21		Patiente référée	Quartiers excentriques et d'extension	2014-12-12	2014-12-12	2014-12-12 08:00:00	36.5	130	2	80	1		0		FALSE	FALSE	FALSE	FALSE	TRUE	FALSE	FALSE	FALSE	FALSE	FALSE	FALSE	FALSE	1117	1	Autres diagnostics	2014-12-12	Traitement médico-chirurgical	FALSE	FALSE	TRUE	FALSE	FALSE	FALSE	TRUE	FALSE	TRUE	FALSE	FALSE	TRUE	FALSE	FALSE
HGR de Bumbu	Quartiers excentriques et d'extension	2015-02-13	Quartiers excentriques et d'extension	29		Patiente référée	Quartiers excentriques et d'extension	2014-12-18	2014-12-18	2014-12-18 15:55:00	36.5	100	5	80	4		0		FALSE	FALSE	FALSE	FALSE	FALSE	FALSE	FALSE	FALSE	TRUE	FALSE	FALSE	FALSE	1118	1	Autres diagnostics	2014-12-18	Traitement médico-chirurgical	FALSE	FALSE	TRUE	FALSE	FALSE	FALSE	TRUE	FALSE	TRUE	FALSE	FALSE	TRUE	FALSE	FALSE
HGR de Bumbu	Quartiers excentriques et d'extension	2015-02-13	Quartiers excentriques et d'extension	32		Patiente référée	Quartiers excentriques et d'extension	2014-12-08	2014-12-08	2014-12-08 21:10:00	36	120	4	70	3		0		FALSE	FALSE	FALSE	FALSE	FALSE	FALSE	TRUE	FALSE	FALSE	FALSE	FALSE	FALSE	1119	1	Autres diagnostics	2014-12-08	Traitement médico-chirurgical	FALSE	FALSE	TRUE	FALSE	FALSE	FALSE	TRUE	FALSE	TRUE	FALSE	FALSE	TRUE	FALSE	FALSE
HGR de Bumbu	Quartiers excentriques et d'extension	2015-02-13	Quartiers résidentiels	28		Patiente venue d'elle même			2014-12-06	2014-12-06 14:26:00			5		3		1		FALSE	FALSE	FALSE	TRUE	FALSE	FALSE	FALSE	FALSE	FALSE	FALSE	FALSE	FALSE	1120	1	Autres diagnostics	2014-12-06	Traitement médico-chirurgical	FALSE	FALSE	TRUE	FALSE	FALSE	FALSE	TRUE	FALSE	TRUE	TRUE	FALSE	TRUE	FALSE	FALSE
HGR de Bumbu	Quartiers excentriques et d'extension	2015-02-13	Quartiers semi-ruraux	32		Patiente référée	Quartiers excentriques et d'extension	2014-11-30	2014-11-30	2014-11-30 07:30:00	36	110	2	70	1		0		FALSE	FALSE	FALSE	TRUE	FALSE	FALSE	FALSE	FALSE	FALSE	TRUE	FALSE	FALSE	1121	1	Autres diagnostics	2014-11-30	Traitement médico-chirurgical	FALSE	FALSE	TRUE	FALSE	FALSE	FALSE	TRUE	FALSE	TRUE	FALSE	FALSE	TRUE	FALSE	FALSE
HGR de Bumbu	Quartiers excentriques et d'extension	2015-02-13	Quartiers excentriques et d'extension	41		Patiente référée			2014-10-29		38	110	2	80	0		1	80	FALSE	FALSE	FALSE	FALSE	TRUE	FALSE	FALSE	FALSE	FALSE	FALSE	FALSE	FALSE	1122	1	Autres diagnostics	2014-10-30	Traitement médico-chirurgical	FALSE	FALSE	TRUE	FALSE	FALSE	FALSE	TRUE	FALSE	TRUE	FALSE	FALSE	TRUE	FALSE	FALSE
HGR de Bumbu	Quartiers excentriques et d'extension	2015-02-13		34		Patiente venue d'elle même			2014-10-27	2014-10-27 10:00:00	36	100	5	80	3		1	80	FALSE	FALSE	FALSE	TRUE	FALSE	FALSE	FALSE	FALSE	FALSE	FALSE	FALSE	FALSE	1123	1	Autres diagnostics	2014-10-27	Traitement médico-chirurgical	TRUE	FALSE	FALSE	FALSE	FALSE	FALSE	TRUE	FALSE	TRUE	FALSE	FALSE	TRUE	FALSE	FALSE
HGR de Bumbu	Quartiers excentriques et d'extension	2015-02-13	Quartiers excentriques et d'extension	32		Patiente venue d'elle même			2014-10-12	2014-10-12 00:30:00			3		2		0		FALSE	FALSE	FALSE	TRUE	FALSE	FALSE	FALSE	FALSE	FALSE	TRUE	FALSE	FALSE	1124	1	Autres diagnostics	2014-10-12	Traitement médico-chirurgical	FALSE	FALSE	TRUE	FALSE	FALSE	FALSE	TRUE	FALSE	TRUE	FALSE	FALSE	FALSE	FALSE	FALSE
HGR de Bumbu	Quartiers excentriques et d'extension	2015-02-13	Quartiers excentriques et d'extension	22		Patiente venue d'elle même			2014-12-23	2014-12-23 14:40:00	36		1		0		0	80	FALSE	FALSE	FALSE	FALSE	FALSE	FALSE	FALSE	FALSE	FALSE	FALSE	FALSE	FALSE	1125	1	Autres diagnostics	2014-12-23	Traitement médico-chirurgical	FALSE	FALSE	TRUE	FALSE	FALSE	FALSE	TRUE	FALSE	TRUE	FALSE	FALSE	TRUE	FALSE	FALSE
HGR de Bumbu	Quartiers excentriques et d'extension	2015-02-13	Quartiers excentriques et d'extension	17		Patiente venue d'elle même			2014-11-18	2014-11-18 03:00:00	36.2	100	1	60	0		0		FALSE	FALSE	FALSE	FALSE	FALSE	FALSE	FALSE	FALSE	FALSE	FALSE	FALSE	FALSE	1126	1	Autres diagnostics	2014-11-18	Traitement médico-chirurgical	FALSE	FALSE	TRUE	FALSE	FALSE	FALSE	TRUE	FALSE	TRUE	FALSE	FALSE	TRUE	FALSE	FALSE
HGR de Bumbu	Quartiers excentriques et d'extension	2015-02-13	Quartiers excentriques et d'extension	37		Patiente venue d'elle même			2014-10-09		36	100		60					FALSE	FALSE	FALSE	FALSE	FALSE	FALSE	FALSE	FALSE	FALSE	FALSE	FALSE	FALSE	1127	1	Autres diagnostics	2014-10-09	Traitement médico-chirurgical	FALSE	FALSE	TRUE	FALSE	FALSE	FALSE	FALSE	FALSE	TRUE	FALSE	FALSE	TRUE	FALSE	FALSE
HGR de Bumbu	Quartiers excentriques et d'extension	2015-02-13		30	Mariée	Patiente venue d'elle même			2014-10-28				4		0		3		FALSE	FALSE	FALSE	FALSE	FALSE	FALSE	FALSE	FALSE	FALSE	FALSE	FALSE	FALSE	1128	1	Autres diagnostics	2014-10-28	Traitement médico-chirurgical	FALSE	FALSE	TRUE	FALSE	FALSE	FALSE	TRUE	FALSE	TRUE	FALSE	FALSE	TRUE	FALSE	FALSE
HGR de Bumbu	Quartiers excentriques et d'extension	2015-02-13	Quartiers excentriques et d'extension	37		Patiente venue d'elle même			2014-11-18		36.5	100	3	60	0		2		FALSE	FALSE	FALSE	TRUE	FALSE	FALSE	FALSE	FALSE	FALSE	FALSE	FALSE	FALSE	1129	1	Autres diagnostics	2014-11-18	Traitement médico-chirurgical	FALSE	FALSE	TRUE	FALSE	FALSE	FALSE	TRUE	FALSE	TRUE	FALSE	FALSE	TRUE	FALSE	FALSE
HGR de Bumbu	Quartiers excentriques et d'extension	2015-02-13	Quartiers excentriques et d'extension	41		Patiente référée	Quartiers excentriques et d'extension	2014-10-27	2014-10-27	2014-10-27 23:45:00	36	150	4	100	3		0		FALSE	FALSE	FALSE	FALSE	TRUE	FALSE	FALSE	FALSE	FALSE	FALSE	FALSE	FALSE	1130	1	Autres diagnostics	2014-10-27	Traitement médico-chirurgical	FALSE	FALSE	TRUE	FALSE	FALSE	FALSE	TRUE	FALSE	TRUE	FALSE	FALSE	TRUE	FALSE	FALSE
HGR de Bumbu	Quartiers excentriques et d'extension	2015-02-13	Quartiers excentriques et d'extension	23		Patiente venue d'elle même			2014-10-05	2014-10-05 23:00:00	37	100	3	50	2		0	80	FALSE	FALSE	FALSE	TRUE	FALSE	FALSE	FALSE	FALSE	FALSE	FALSE	FALSE	FALSE	1131	1	Autres diagnostics	2014-10-05	Traitement médico-chirurgical	FALSE	FALSE	TRUE	FALSE	FALSE	FALSE	TRUE	FALSE	TRUE	FALSE	FALSE	TRUE	FALSE	FALSE
HGR de Bumbu	Quartiers excentriques et d'extension	2015-02-13	Quartiers excentriques et d'extension	18		Patiente venue d'elle même			2014-11-16	2014-11-16 09:00:00	36	120	1	80	0		0		FALSE	FALSE	FALSE	FALSE	TRUE	FALSE	FALSE	FALSE	FALSE	FALSE	FALSE	FALSE	1132	1	Autres diagnostics	2014-11-16	Traitement médico-chirurgical	FALSE	FALSE	TRUE	FALSE	FALSE	FALSE	TRUE	FALSE	TRUE	FALSE	FALSE	TRUE	FALSE	FALSE
HGR de Bumbu	Quartiers excentriques et d'extension	2015-02-13	Quartiers excentriques et d'extension	21		Patiente référée	Quartiers excentriques et d'extension	2014-10-15	2014-10-15	2014-10-15 19:00:00	36.8	100	1	60	0		0	80	FALSE	FALSE	FALSE	TRUE	FALSE	FALSE	FALSE	FALSE	FALSE	FALSE	FALSE	FALSE	1133	1	Autres diagnostics	2014-10-15	Traitement médico-chirurgical	FALSE	FALSE	TRUE	FALSE	FALSE	FALSE	TRUE	FALSE	TRUE	FALSE	FALSE	TRUE	FALSE	TRUE
HGR de Bumbu	Quartiers excentriques et d'extension	2015-02-13	Quartiers excentriques et d'extension			Patiente référée	Quartiers excentriques et d'extension	2014-10-18	2014-10-18	2014-10-18 00:31:00			3		2		0		FALSE	FALSE	FALSE	FALSE	FALSE	FALSE	FALSE	FALSE	FALSE	TRUE	FALSE	FALSE	1134	1	Autres diagnostics	2014-10-18	Traitement médico-chirurgical	FALSE	FALSE	TRUE	FALSE	FALSE	FALSE	TRUE	FALSE	TRUE	FALSE	FALSE	TRUE	FALSE	FALSE
HGR de Bumbu	Quartiers excentriques et d'extension	2015-02-13	Quartiers excentriques et d'extension	26	Mariée	Patiente référée	Quartiers excentriques et d'extension	2014-11-11	2014-11-11	2014-11-11 19:20:00		110	2	70	1		0		FALSE	FALSE	FALSE	TRUE	FALSE	FALSE	FALSE	FALSE	FALSE	FALSE	FALSE	FALSE	1135	1	Autres diagnostics	2014-11-11	Traitement médico-chirurgical	FALSE	FALSE	TRUE	FALSE	FALSE	FALSE	TRUE	FALSE	TRUE	TRUE	FALSE	TRUE	FALSE	FALSE
HGR de Bumbu	Quartiers excentriques et d'extension	2015-02-13	Quartiers excentriques et d'extension	24	Mariée	Patiente venue d'elle même			2014-11-09	2014-11-09 05:50:00	36	100	3	60	2		0	80	FALSE	FALSE	FALSE	TRUE	FALSE	FALSE	FALSE	FALSE	FALSE	FALSE	FALSE	FALSE	1136	1	Autres diagnostics	2014-11-09	Traitement médico-chirurgical	FALSE	FALSE	TRUE	FALSE	FALSE	FALSE	TRUE	FALSE	TRUE	TRUE	FALSE	TRUE	FALSE	FALSE
HGR de Bumbu	Quartiers excentriques et d'extension	2015-02-13	Quartiers excentriques et d'extension	22		Patiente venue d'elle même			2014-11-15	2014-11-15 13:25:00	36	100	4	70	1		2		FALSE	FALSE	FALSE	TRUE	FALSE	FALSE	FALSE	FALSE	FALSE	FALSE	FALSE	FALSE	1137	1	Autres diagnostics	2014-11-15	Traitement médico-chirurgical	FALSE	FALSE	TRUE	FALSE	FALSE	FALSE	TRUE	FALSE	TRUE	FALSE	FALSE	TRUE	FALSE	FALSE
HGR de Bumbu	Quartiers excentriques et d'extension	2015-02-13	Quartiers excentriques et d'extension	22		Patiente venue d'elle même			2014-11-11										FALSE	FALSE	FALSE	FALSE	FALSE	FALSE	FALSE	FALSE	FALSE	FALSE	FALSE	FALSE	1138	1	Autres diagnostics	2014-11-11	Traitement médico-chirurgical	FALSE	FALSE	TRUE	FALSE	FALSE	FALSE	TRUE	FALSE	TRUE	FALSE	FALSE	FALSE	FALSE	FALSE
HGR de Bumbu	Quartiers excentriques et d'extension	2015-02-13	Quartiers excentriques et d'extension	19		Patiente venue d'elle même			2014-11-16	2014-11-16 17:25:00	36	100	1	60	0		0	80	FALSE	FALSE	FALSE	FALSE	FALSE	FALSE	FALSE	FALSE	FALSE	TRUE	FALSE	FALSE	1139	1	Autres diagnostics	2014-11-16	Traitement médico-chirurgical	FALSE	FALSE	TRUE	FALSE	FALSE	FALSE	TRUE	FALSE	TRUE	FALSE	FALSE	TRUE	FALSE	FALSE
HGR de Bumbu	Quartiers excentriques et d'extension	2015-02-13	Quartiers excentriques et d'extension	13		Patiente venue d'elle même			2014-10-26	2014-10-26 02:00:00			1		0		0		FALSE	FALSE	FALSE	FALSE	FALSE	FALSE	FALSE	FALSE	TRUE	FALSE	FALSE	FALSE	1140	1	Autres diagnostics	2014-10-26	Traitement médico-chirurgical	FALSE	FALSE	TRUE	FALSE	FALSE	FALSE	TRUE	FALSE	TRUE	FALSE	FALSE	TRUE	FALSE	TRUE
HGR de Bumbu	Quartiers excentriques et d'extension	2015-02-09	Quartiers excentriques et d'extension	29		Patiente référée		2014-05-15	2014-05-15	2014-05-15 20:40:00		120	4	70	3		0	64	FALSE	FALSE	FALSE	TRUE	FALSE	FALSE	FALSE	FALSE	FALSE	FALSE	FALSE	FALSE	1141	1	Autres diagnostics	2014-05-15	Traitement médico-chirurgical	FALSE	FALSE	TRUE	FALSE	FALSE	FALSE	TRUE	FALSE	TRUE	FALSE	FALSE	TRUE	FALSE	FALSE
HGR de Bumbu	Quartiers excentriques et d'extension	2015-02-09	Quartiers excentriques et d'extension	40	Mariée	Patiente venue d'elle même			2014-05-26	2014-05-26 11:00:00		130	6	80	5		0	80	FALSE	FALSE	FALSE	TRUE	FALSE	FALSE	FALSE	FALSE	FALSE	FALSE	FALSE	FALSE	1142	1	Autres diagnostics	2014-05-26	Traitement médico-chirurgical	FALSE	FALSE	TRUE	FALSE	FALSE	FALSE	TRUE	FALSE	TRUE	FALSE	FALSE	TRUE	FALSE	FALSE
HGR de Bumbu	Quartiers excentriques et d'extension	2015-02-09	Quartiers excentriques et d'extension	26		Patiente venue d'elle même			2014-05-27	2014-05-27 21:40:00	36	100	1	60	0		0	80	FALSE	FALSE	FALSE	FALSE	FALSE	FALSE	TRUE	FALSE	FALSE	FALSE	FALSE	FALSE	1143	1	Autres diagnostics	2014-05-27	Traitement médico-chirurgical	FALSE	FALSE	TRUE	FALSE	FALSE	FALSE	TRUE	FALSE	TRUE	FALSE	FALSE	TRUE	FALSE	FALSE
HGR de Bumbu	Quartiers excentriques et d'extension	2015-02-09	Quartiers excentriques et d'extension	38		Patiente venue d'elle même			2014-07-08	2014-07-08 17:00:00	37	160	2	100	0		1		FALSE	FALSE	FALSE	TRUE	FALSE	FALSE	FALSE	FALSE	FALSE	FALSE	FALSE	FALSE	1144	1	Autres diagnostics	2014-07-08	Traitement médico-chirurgical	FALSE	FALSE	FALSE	FALSE	TRUE	FALSE	FALSE	FALSE	TRUE	TRUE	FALSE	FALSE	FALSE	FALSE
HGR de Bumbu	Quartiers excentriques et d'extension	2015-02-09	Quartiers excentriques et d'extension	23		Patiente venue d'elle même			2014-05-01	2014-05-01 15:30:00	36	120	1	80	0		0	80	FALSE	FALSE	FALSE	TRUE	FALSE	FALSE	FALSE	FALSE	FALSE	FALSE	FALSE	FALSE	1145	1	Autres diagnostics	2014-05-01	Traitement médico-chirurgical	FALSE	FALSE	TRUE	FALSE	FALSE	FALSE	TRUE	FALSE	TRUE	FALSE	FALSE	TRUE	FALSE	TRUE
HGR de Bumbu	Quartiers excentriques et d'extension	2015-02-09		31		Patiente venue d'elle même			2014-05-13	2014-05-13 18:15:00	36	120		70				80	FALSE	FALSE	FALSE	FALSE	FALSE	FALSE	FALSE	FALSE	TRUE	TRUE	FALSE	FALSE	1146	1	Autres diagnostics	2014-05-13	Traitement médico-chirurgical	FALSE	FALSE	TRUE	FALSE	FALSE	FALSE	TRUE	FALSE	TRUE	TRUE	FALSE	FALSE	FALSE	FALSE
HGR de Bumbu	Quartiers excentriques et d'extension	2015-02-09	Quartiers excentriques et d'extension	27		Patiente venue d'elle même			2014-05-14	2014-05-14 22:00:00	36	100	4	60	3		0		FALSE	FALSE	FALSE	FALSE	FALSE	FALSE	TRUE	FALSE	FALSE	FALSE	FALSE	FALSE	1147	1	Autres diagnostics	2014-05-14	Traitement médico-chirurgical	FALSE	FALSE	TRUE	FALSE	FALSE	FALSE	TRUE	FALSE	TRUE	FALSE	FALSE	TRUE	FALSE	FALSE
HGR de Bumbu	Quartiers excentriques et d'extension	2015-02-09	Quartiers excentriques et d'extension	36		Patiente venue d'elle même			2014-05-20	2014-05-20 06:00:00	36	100	2	60	1		0	80	FALSE	FALSE	FALSE	FALSE	FALSE	FALSE	FALSE	FALSE	FALSE	FALSE	FALSE	FALSE	1148	1	Autres diagnostics	2014-05-20	Traitement médico-chirurgical	FALSE	FALSE	TRUE	FALSE	FALSE	FALSE	FALSE	FALSE	TRUE	FALSE	FALSE	TRUE	FALSE	FALSE
HGR de Bumbu	Quartiers excentriques et d'extension	2015-02-09	Quartiers des anciennes cités	31		Patiente venue d'elle même			2014-05-17	2014-05-17 06:30:00	36	100	3	70	2		0	80	FALSE	FALSE	FALSE	FALSE	FALSE	FALSE	FALSE	FALSE	FALSE	TRUE	FALSE	FALSE	1149	1	Autres diagnostics	2014-05-17	Traitement médico-chirurgical	FALSE	FALSE	TRUE	FALSE	FALSE	FALSE	TRUE	FALSE	TRUE	FALSE	FALSE	TRUE	FALSE	FALSE
HGR de Bumbu	Quartiers excentriques et d'extension	2015-02-09	Quartiers excentriques et d'extension	35	Mariée	Patiente venue d'elle même			2014-04-24	2014-04-24 19:55:00		110	4	70	3		0		FALSE	FALSE	FALSE	FALSE	FALSE	FALSE	FALSE	FALSE	FALSE	FALSE	FALSE	FALSE	1150	1	Autres diagnostics	2014-04-24	Traitement médico-chirurgical	FALSE	FALSE	TRUE	FALSE	FALSE	FALSE	TRUE	FALSE	TRUE	FALSE	FALSE	TRUE	FALSE	FALSE
HGR de Bumbu	Quartiers excentriques et d'extension	2015-02-09	Quartiers excentriques et d'extension	24		Patiente venue d'elle même			2014-04-27	2014-04-27 10:00:00	36	100	2	60	1		0	80	FALSE	FALSE	FALSE	FALSE	FALSE	FALSE	FALSE	FALSE	TRUE	TRUE	FALSE	FALSE	1151	1	Autres diagnostics	2014-04-27	Traitement médico-chirurgical	FALSE	FALSE	TRUE	FALSE	FALSE	FALSE	TRUE	FALSE	TRUE	FALSE	FALSE	FALSE	FALSE	FALSE
HGR de Bumbu	Quartiers excentriques et d'extension	2015-02-09	Quartiers excentriques et d'extension	27		Patiente référée	Quartiers excentriques et d'extension	2014-05-16	2014-05-16	2014-05-16		120	1	80	0		0	80	FALSE	FALSE	FALSE	FALSE	TRUE	FALSE	FALSE	FALSE	TRUE	FALSE	FALSE	FALSE	1152	1	Autres diagnostics	2014-05-16	Traitement médico-chirurgical	FALSE	FALSE	TRUE	FALSE	FALSE	FALSE	TRUE	TRUE	FALSE	FALSE	FALSE	FALSE	FALSE	FALSE
HGR de Bumbu	Quartiers excentriques et d'extension	2015-02-10		22		Patiente référée		2014-06-11	2014-06-11	2014-06-11 14:45:00	36.3	110		60				100	FALSE	FALSE	FALSE	TRUE	FALSE	FALSE	FALSE	FALSE	FALSE	FALSE	FALSE	FALSE	1153	1	Autres diagnostics	2014-06-11	Traitement médico-chirurgical	FALSE	FALSE	TRUE	FALSE	FALSE	FALSE	TRUE	FALSE	TRUE	TRUE	FALSE	FALSE	FALSE	FALSE
HGR de Bumbu	Quartiers excentriques et d'extension	2015-02-10	Quartiers excentriques et d'extension	20		Patiente venue d'elle même			2014-01-24	2014-01-24 00:53:00	36	120		80					FALSE	FALSE	FALSE	FALSE	FALSE	FALSE	FALSE	FALSE	FALSE	FALSE	FALSE	FALSE	1154	1	Autres diagnostics	2014-01-24	Traitement médico-chirurgical	TRUE	FALSE	FALSE	FALSE	FALSE	FALSE	FALSE	FALSE	TRUE	FALSE	FALSE	TRUE	FALSE	FALSE
HGR de Bumbu	Quartiers excentriques et d'extension	2015-02-10	Quartiers des cités planifiées	28		Patiente venue d'elle même			2014-06-08	2014-06-08 06:35:00	36	120		70				80	FALSE	FALSE	FALSE	FALSE	FALSE	FALSE	FALSE	FALSE	TRUE	FALSE	FALSE	FALSE	1155	1	Autres diagnostics	2014-06-08	Traitement médico-chirurgical	FALSE	FALSE	TRUE	FALSE	FALSE	FALSE	TRUE	FALSE	TRUE	FALSE	FALSE	TRUE	FALSE	FALSE
HGR de Bumbu	Quartiers excentriques et d'extension	2015-02-10	Quartiers excentriques et d'extension	35		Patiente venue d'elle même			2014-05-31	2014-05-31 23:30:00	36.5	100	1	60	0		0	80	FALSE	FALSE	FALSE	TRUE	FALSE	FALSE	FALSE	FALSE	FALSE	FALSE	FALSE	FALSE	1156	1	Autres diagnostics	2014-05-31	Traitement médico-chirurgical	FALSE	FALSE	TRUE	FALSE	FALSE	FALSE	TRUE	FALSE	TRUE	FALSE	FALSE	TRUE	FALSE	FALSE
HGR de Bumbu	Quartiers excentriques et d'extension	2015-02-10		34		Patiente venue d'elle même			2014-06-05	2014-06-05 16:17:00			1		0		0		FALSE	FALSE	FALSE	FALSE	TRUE	FALSE	FALSE	FALSE	FALSE	FALSE	TRUE	FALSE	1157	1	Autres diagnostics	2014-06-05	Traitement médico-chirurgical	FALSE	FALSE	TRUE	FALSE	FALSE	FALSE	TRUE	TRUE	TRUE	FALSE	FALSE	TRUE	FALSE	FALSE
HGR de Bumbu	Quartiers excentriques et d'extension	2015-02-10	Quartiers excentriques et d'extension	22		Patiente référée		2014-06-23	2014-06-23	2014-06-23 23:00:00		100	1	70	0		0		FALSE	FALSE	FALSE	FALSE	FALSE	FALSE	FALSE	FALSE	TRUE	FALSE	FALSE	FALSE	1158	1	Autres diagnostics	2014-06-23	Traitement médico-chirurgical	FALSE	FALSE	TRUE	FALSE	FALSE	FALSE	FALSE	FALSE	TRUE	TRUE	FALSE	FALSE	FALSE	FALSE
HGR de Bumbu	Quartiers excentriques et d'extension	2015-02-10		19		Patiente venue d'elle même			2014-06-12	2014-06-12 17:30:00	36	100	2	60	1		0	80	FALSE	FALSE	FALSE	FALSE	FALSE	FALSE	FALSE	FALSE	TRUE	TRUE	FALSE	FALSE	1159	1	Autres diagnostics	2014-06-12	Traitement médico-chirurgical	FALSE	FALSE	TRUE	FALSE	FALSE	FALSE	TRUE	FALSE	TRUE	FALSE	FALSE	FALSE	FALSE	FALSE
HGR de Bumbu	Quartiers excentriques et d'extension	2015-02-10	Quartiers résidentiels	38		Patiente venue d'elle même			2014-06-25	2014-06-25 08:00:00	36	110	4	70	3		0	86	FALSE	FALSE	FALSE	FALSE	FALSE	FALSE	FALSE	FALSE	FALSE	FALSE	FALSE	FALSE	1160	1	Autres diagnostics	2014-06-25	Traitement médico-chirurgical	FALSE	FALSE	TRUE	FALSE	FALSE	FALSE	TRUE	FALSE	TRUE	FALSE	FALSE	TRUE	FALSE	FALSE
HGR de Bumbu	Quartiers excentriques et d'extension	2015-02-10		35		Patiente venue d'elle même			2014-06-26			110		70		16		96	FALSE	FALSE	FALSE	TRUE	FALSE	FALSE	FALSE	FALSE	FALSE	FALSE	FALSE	FALSE	1161	1	Autres diagnostics	2014-06-26	Traitement médico-chirurgical	FALSE	FALSE	TRUE	FALSE	FALSE	FALSE	TRUE	FALSE	TRUE	FALSE	FALSE	FALSE	FALSE	FALSE
HGR de Bumbu	Quartiers excentriques et d'extension	2015-02-10		38	Mariée	Patiente venue d'elle même			2014-06-10										FALSE	FALSE	FALSE	TRUE	FALSE	FALSE	FALSE	FALSE	FALSE	FALSE	FALSE	FALSE	1162	1	Autres diagnostics	2014-06-10	Traitement médico-chirurgical	TRUE	FALSE	FALSE	FALSE	FALSE	FALSE	TRUE	FALSE	TRUE	FALSE	FALSE	TRUE	FALSE	FALSE
HGR de Bumbu	Quartiers excentriques et d'extension	2015-02-09	Quartiers excentriques et d'extension	26		Patiente venue d'elle même			2014-02-14	2014-02-14 23:50:00	36	90	2	60	1		0	80	FALSE	FALSE	FALSE	TRUE	FALSE	FALSE	FALSE	FALSE	FALSE	FALSE	FALSE	FALSE	1163	1	Autres diagnostics	2014-02-14	Traitement médico-chirurgical	FALSE	FALSE	TRUE	FALSE	FALSE	FALSE	TRUE	FALSE	TRUE	FALSE	FALSE	TRUE	FALSE	FALSE
HGR de Bumbu	Quartiers excentriques et d'extension	2015-02-09	Quartiers excentriques et d'extension	28		Patiente référée	Quartiers excentriques et d'extension	2014-03-23	2014-03-23	2014-03-23 19:37:00	36		1		0		0	80	FALSE	FALSE	FALSE	FALSE	FALSE	FALSE	FALSE	FALSE	TRUE	FALSE	FALSE	FALSE	1164	1	Autres diagnostics	2014-03-23	Traitement médico-chirurgical	FALSE	FALSE	TRUE	FALSE	FALSE	FALSE	TRUE	FALSE	TRUE	FALSE	FALSE	FALSE	FALSE	FALSE
HGR de Bumbu	Quartiers excentriques et d'extension	2015-02-09	Quartiers excentriques et d'extension	40	Mariée	Patiente venue d'elle même			2014-03-22	2014-03-22 21:20:00		100	7	60	6		0		FALSE	FALSE	FALSE	FALSE	FALSE	FALSE	FALSE	FALSE	FALSE	FALSE	FALSE	FALSE	1165	1	Autres diagnostics	2014-03-22	Traitement médico-chirurgical	FALSE	FALSE	TRUE	FALSE	FALSE	FALSE	TRUE	FALSE	TRUE	FALSE	FALSE	FALSE	FALSE	FALSE
HGR de Bumbu	Quartiers excentriques et d'extension	2015-02-09	Quartiers excentriques et d'extension	18		Patiente venue d'elle même			2014-04-25	2014-04-25 11:30:00	36	100	1	60	0		0	80	FALSE	FALSE	FALSE	FALSE	FALSE	FALSE	FALSE	FALSE	FALSE	FALSE	FALSE	FALSE	1166	1	Autres diagnostics	2014-04-25	Traitement médico-chirurgical	FALSE	FALSE	TRUE	FALSE	FALSE	FALSE	TRUE	FALSE	TRUE	FALSE	FALSE	TRUE	FALSE	FALSE
HGR de Bumbu	Quartiers excentriques et d'extension	2015-02-09	Quartiers excentriques et d'extension	30		Patiente venue d'elle même			2014-04-12		37		1		0		0	80	FALSE	FALSE	FALSE	FALSE	FALSE	FALSE	FALSE	FALSE	TRUE	FALSE	FALSE	FALSE	1167	1	Autres diagnostics	2014-04-12	Traitement médico-chirurgical	FALSE	FALSE	TRUE	FALSE	FALSE	FALSE	TRUE	FALSE	TRUE	FALSE	FALSE	FALSE	FALSE	FALSE
HGR de Bumbu	Quartiers excentriques et d'extension	2015-02-09	Quartiers excentriques et d'extension	17		Patiente venue d'elle même			2014-05-08	2014-05-08 20:30:00	36	100	1	60	0		0	80	FALSE	FALSE	FALSE	FALSE	FALSE	FALSE	FALSE	FALSE	FALSE	FALSE	TRUE	FALSE	1168	1	Autres diagnostics	2014-05-08	Traitement médico-chirurgical	FALSE	FALSE	TRUE	FALSE	FALSE	FALSE	TRUE	FALSE	FALSE	FALSE	FALSE	FALSE	FALSE	FALSE
HGR de Bumbu	Quartiers excentriques et d'extension	2015-02-09	Quartiers excentriques et d'extension	32		Patiente référée	Quartiers excentriques et d'extension	2014-04-30	2014-04-30	2014-04-30 11:20:00	36		5		4		0	80	FALSE	FALSE	FALSE	FALSE	TRUE	FALSE	FALSE	FALSE	FALSE	FALSE	FALSE	FALSE	1169	1	Autres diagnostics	2014-04-30	Traitement médico-chirurgical	FALSE	FALSE	TRUE	FALSE	FALSE	FALSE	TRUE	FALSE	TRUE	FALSE	FALSE	TRUE	FALSE	FALSE
HGR de Bumbu	Quartiers excentriques et d'extension	2015-02-09	Quartiers excentriques et d'extension	46		Patiente venue d'elle même			2014-04-30	2014-04-30 11:00:00	36	100		60				80	FALSE	FALSE	FALSE	TRUE	FALSE	FALSE	TRUE	FALSE	FALSE	FALSE	FALSE	FALSE	1170	1	Autres diagnostics	2014-04-30	Traitement médico-chirurgical	FALSE	FALSE	TRUE	FALSE	FALSE	FALSE	TRUE	FALSE	TRUE	FALSE	FALSE	FALSE	FALSE	FALSE
HGR de Bumbu	Quartiers excentriques et d'extension	2015-02-09	Quartiers excentriques et d'extension	17		Patiente référée		2014-03-20	2014-03-21	2014-03-21 09:45:00	36	120	1	70	0		0		FALSE	FALSE	FALSE	FALSE	FALSE	FALSE	FALSE	FALSE	FALSE	FALSE	FALSE	FALSE	1171	1	Autres diagnostics	2014-03-21	Traitement médico-chirurgical	FALSE	FALSE	FALSE	FALSE	FALSE	FALSE	FALSE	FALSE	FALSE	FALSE	FALSE	FALSE	FALSE	FALSE
HGR de Bumbu	Quartiers excentriques et d'extension	2015-02-09	Quartiers excentriques et d'extension	19		Patiente venue d'elle même			2014-04-28										FALSE	FALSE	FALSE	FALSE	FALSE	FALSE	FALSE	FALSE	FALSE	FALSE	FALSE	FALSE	1172	1	Autres diagnostics	2014-04-28	Traitement médico-chirurgical	FALSE	FALSE	TRUE	FALSE	FALSE	FALSE	FALSE	FALSE	TRUE	FALSE	FALSE	TRUE	FALSE	FALSE
HGR de Bumbu	Quartiers excentriques et d'extension	2015-02-09	Quartiers des cités planifiées	30		Patiente venue d'elle même			2014-04-17	2014-04-17 13:00:00									FALSE	FALSE	FALSE	FALSE	FALSE	FALSE	FALSE	FALSE	FALSE	FALSE	FALSE	FALSE	1173	1	Autres diagnostics	2014-04-17	Traitement médico-chirurgical	FALSE	FALSE	TRUE	FALSE	FALSE	FALSE	TRUE	FALSE	TRUE	FALSE	FALSE	TRUE	FALSE	FALSE
HGR de Bumbu	Quartiers excentriques et d'extension	2015-02-09	Quartiers excentriques et d'extension	27		Patiente venue d'elle même			2014-04-14	2014-04-14 06:00:00	36	90	3	60	2		0	80	FALSE	FALSE	FALSE	FALSE	FALSE	FALSE	FALSE	FALSE	TRUE	FALSE	FALSE	FALSE	1174	1	Autres diagnostics	2014-04-14	Traitement médico-chirurgical	FALSE	FALSE	FALSE	FALSE	FALSE	FALSE	FALSE	FALSE	FALSE	FALSE	FALSE	FALSE	FALSE	FALSE
HGR de Bumbu	Quartiers excentriques et d'extension	2015-02-09		27		Patiente venue d'elle même			2014-04-19	2014-04-19 14:20:00									FALSE	FALSE	FALSE	FALSE	FALSE	FALSE	FALSE	FALSE	TRUE	FALSE	FALSE	FALSE	1175	1	Autres diagnostics	2014-04-19	Traitement médico-chirurgical	FALSE	FALSE	TRUE	FALSE	FALSE	FALSE	TRUE	FALSE	TRUE	FALSE	FALSE	FALSE	FALSE	FALSE
HGR de Bumbu	Quartiers excentriques et d'extension	2015-02-09	Quartiers excentriques et d'extension	19		Patiente référée	Quartiers excentriques et d'extension	2014-05-02	2014-05-02	2014-05-02 18:00:00	36	110	3	70	1		1	80	FALSE	FALSE	FALSE	FALSE	FALSE	FALSE	FALSE	FALSE	FALSE	TRUE	FALSE	FALSE	1176	1	Autres diagnostics	2014-05-02	Traitement médico-chirurgical	TRUE	FALSE	FALSE	FALSE	FALSE	FALSE	TRUE	FALSE	FALSE	FALSE	FALSE	FALSE	FALSE	FALSE
HGR de Bumbu	Quartiers excentriques et d'extension	2015-02-09	Quartiers excentriques et d'extension	29		Patiente venue d'elle même			2014-04-28	2014-04-28 23:30:00		90	5	60	3		1	80	FALSE	FALSE	FALSE	FALSE	FALSE	FALSE	FALSE	FALSE	FALSE	FALSE	FALSE	FALSE	1177	1	Autres diagnostics	2014-04-28	Traitement médico-chirurgical	FALSE	FALSE	TRUE	FALSE	FALSE	FALSE	TRUE	FALSE	TRUE	FALSE	FALSE	TRUE	FALSE	FALSE
HGR de Bumbu	Quartiers excentriques et d'extension	2015-02-09	Quartiers excentriques et d'extension	25		Patiente venue d'elle même			2014-04-06	2014-04-06 21:58:00	36	120	1	80	0		0		FALSE	FALSE	FALSE	FALSE	FALSE	FALSE	FALSE	FALSE	FALSE	FALSE	FALSE	FALSE	1178	1	Autres diagnostics	2014-04-06	Traitement médico-chirurgical	TRUE	FALSE	FALSE	FALSE	FALSE	FALSE	TRUE	FALSE	TRUE	FALSE	FALSE	TRUE	FALSE	FALSE
HGR de Bumbu	Quartiers excentriques et d'extension	2015-02-09	Quartiers excentriques et d'extension	40		Patiente venue d'elle même			2014-04-25	2014-04-25 17:00:00	36	120	1	80	0		0	82	FALSE	FALSE	FALSE	FALSE	FALSE	FALSE	FALSE	FALSE	FALSE	FALSE	FALSE	FALSE	1179	1	Autres diagnostics	2014-04-25	Traitement médico-chirurgical	TRUE	FALSE	FALSE	FALSE	FALSE	FALSE	TRUE	FALSE	TRUE	FALSE	FALSE	TRUE	FALSE	FALSE
HGR de Bumbu	Quartiers excentriques et d'extension	2015-02-09	Quartiers excentriques et d'extension	22		Patiente venue d'elle même			2014-05-10	2014-05-10 16:00:00	36	110	3	70	2		0	78	FALSE	FALSE	FALSE	FALSE	FALSE	FALSE	TRUE	FALSE	FALSE	FALSE	FALSE	FALSE	1180	1	Autres diagnostics	2014-05-10	Traitement médico-chirurgical	FALSE	FALSE	TRUE	FALSE	FALSE	FALSE	TRUE	FALSE	TRUE	FALSE	FALSE	TRUE	FALSE	FALSE
HGR de Bumbu	Quartiers excentriques et d'extension	2015-02-09	Quartiers excentriques et d'extension	28		Patiente venue d'elle même			2014-04-30	2014-04-30 05:20:00	36	100	1	80	0		0	78	FALSE	FALSE	FALSE	FALSE	FALSE	FALSE	FALSE	FALSE	TRUE	FALSE	FALSE	FALSE	1181	1	Autres diagnostics	2014-04-30	Traitement médico-chirurgical	FALSE	FALSE	TRUE	FALSE	FALSE	FALSE	TRUE	FALSE	TRUE	FALSE	FALSE	TRUE	FALSE	FALSE
HGR de Bumbu	Quartiers excentriques et d'extension	2015-02-09		35		Patiente référée		2014-03-14	2014-03-14	2014-03-14 11:30:00	36.5	160	3	110	2		0		FALSE	FALSE	FALSE	FALSE	TRUE	FALSE	FALSE	FALSE	FALSE	FALSE	FALSE	FALSE	1182	1	Autres diagnostics	2014-03-14	Traitement médico-chirurgical	TRUE	FALSE	FALSE	FALSE	FALSE	FALSE	TRUE	FALSE	TRUE	FALSE	FALSE	TRUE	FALSE	FALSE
HGR de Bumbu	Quartiers excentriques et d'extension	2015-02-11	Quartiers excentriques et d'extension	27		Patiente venue d'elle même			2014-07-17	2014-07-17 16:45:00	36.2	160	1	100	0		0	80	FALSE	FALSE	FALSE	FALSE	TRUE	FALSE	FALSE	FALSE	FALSE	FALSE	FALSE	FALSE	1183	1	Autres diagnostics	2014-07-17	Traitement médico-chirurgical	FALSE	FALSE	TRUE	FALSE	FALSE	FALSE	TRUE	TRUE	TRUE	FALSE	FALSE	TRUE	FALSE	FALSE
HGR de Bumbu	Quartiers excentriques et d'extension	2015-02-11		19		Patiente venue d'elle même			2014-06-24	2014-06-24 22:30:00	36	100	1	70	0		0		FALSE	FALSE	FALSE	FALSE	FALSE	FALSE	FALSE	FALSE	FALSE	TRUE	FALSE	FALSE	1184	1	Autres diagnostics	2014-06-24	Traitement médico-chirurgical	FALSE	FALSE	TRUE	FALSE	FALSE	FALSE	TRUE	FALSE	TRUE	FALSE	FALSE	TRUE	FALSE	FALSE
HGR de Bumbu	Quartiers excentriques et d'extension	2015-02-11	Quartiers excentriques et d'extension	23		Patiente venue d'elle même			2014-07-14	2014-07-14 01:00:00			3		1		1		FALSE	FALSE	FALSE	TRUE	FALSE	FALSE	FALSE	FALSE	TRUE	FALSE	FALSE	FALSE	1185	1	Autres diagnostics	2014-07-14	Traitement médico-chirurgical	FALSE	FALSE	TRUE	FALSE	FALSE	FALSE	TRUE	FALSE	TRUE	FALSE	FALSE	TRUE	FALSE	FALSE
HGR de Bumbu	Quartiers excentriques et d'extension	2015-02-11	Quartiers résidentiels	18		Patiente venue d'elle même			2014-06-18	2014-06-18 19:25:00	36.4	90	2	60	1		0		FALSE	FALSE	FALSE	TRUE	FALSE	FALSE	FALSE	FALSE	FALSE	FALSE	FALSE	FALSE	1186	1	Autres diagnostics	2014-06-18	Traitement médico-chirurgical	FALSE	FALSE	TRUE	TRUE	FALSE	FALSE	TRUE	FALSE	FALSE	FALSE	FALSE	TRUE	FALSE	FALSE
HGR de Bumbu	Quartiers excentriques et d'extension	2015-02-11	Quartiers excentriques et d'extension	17	Celibataire	Patiente venue d'elle même			2014-07-24	2014-07-24 18:10:00	36.3	160	1	120	0		0		FALSE	FALSE	FALSE	FALSE	TRUE	FALSE	FALSE	FALSE	FALSE	FALSE	FALSE	FALSE	1187	1	Autres diagnostics	2014-07-24	Traitement médico-chirurgical	FALSE	FALSE	TRUE	FALSE	FALSE	FALSE	TRUE	TRUE	FALSE	FALSE	FALSE	FALSE	FALSE	FALSE
HGR de Bumbu	Quartiers excentriques et d'extension	2015-02-10	Quartiers excentriques et d'extension	28	Mariée	Patiente venue d'elle même			2014-03-17	2014-03-17 21:00:00	36	100	1	60	0		0	80	FALSE	FALSE	FALSE	FALSE	FALSE	FALSE	FALSE	FALSE	TRUE	FALSE	FALSE	FALSE	1188	1	Autres diagnostics	2014-03-17	Traitement médico-chirurgical	FALSE	FALSE	TRUE	FALSE	FALSE	FALSE	TRUE	FALSE	TRUE	FALSE	FALSE	FALSE	FALSE	FALSE
HGR de Bumbu	Quartiers excentriques et d'extension	2015-02-10	Quartiers excentriques et d'extension	20		Patiente venue d'elle même			2014-03-02	2014-03-02 10:20:00	36	120	1	70	0		0	80	FALSE	FALSE	FALSE	FALSE	TRUE	FALSE	FALSE	FALSE	FALSE	FALSE	FALSE	FALSE	1189	1	Autres diagnostics	2014-03-02	Traitement médico-chirurgical	FALSE	FALSE	TRUE	FALSE	FALSE	FALSE	TRUE	FALSE	TRUE	FALSE	FALSE	TRUE	FALSE	FALSE
HGR de Bumbu	Quartiers excentriques et d'extension	2015-02-10	Quartiers excentriques et d'extension	40		Patiente venue d'elle même			2014-03-10	2014-03-10 22:00:00	36	100	8	60	4		3	80	FALSE	FALSE	FALSE	FALSE	FALSE	FALSE	FALSE	FALSE	TRUE	FALSE	FALSE	FALSE	1190	1	Autres diagnostics	2014-03-10	Traitement médico-chirurgical	FALSE	FALSE	TRUE	FALSE	FALSE	FALSE	TRUE	FALSE	TRUE	FALSE	FALSE	TRUE	FALSE	FALSE
HGR de Bumbu	Quartiers excentriques et d'extension	2015-02-10	Quartiers des cités planifiées	25		Patiente référée	Quartiers des cités planifiées	2014-03-16	2014-03-16				2		1		0		FALSE	FALSE	FALSE	FALSE	FALSE	FALSE	TRUE	FALSE	TRUE	FALSE	FALSE	FALSE	1191	1	Autres diagnostics	2014-03-16	Traitement médico-chirurgical	FALSE	TRUE	TRUE	FALSE	FALSE	FALSE	TRUE	FALSE	TRUE	FALSE	FALSE	TRUE	FALSE	FALSE
HGR de Bumbu	Quartiers excentriques et d'extension	2015-02-10		39		Patiente venue d'elle même			2014-03-14	2014-03-14 11:50:00	37	100		60				138	FALSE	FALSE	FALSE	FALSE	FALSE	FALSE	FALSE	FALSE	FALSE	FALSE	FALSE	FALSE	1192	1	Autres diagnostics	2014-03-14	Traitement médico-chirurgical	FALSE	FALSE	TRUE	FALSE	FALSE	FALSE	TRUE	FALSE	TRUE	FALSE	FALSE	TRUE	FALSE	TRUE
HGR de Bumbu	Quartiers excentriques et d'extension	2015-02-10	Quartiers excentriques et d'extension	23		Patiente venue d'elle même			2014-02-21	2014-02-21 01:30:00	36	90	3	60	0		2		FALSE	FALSE	FALSE	FALSE	FALSE	FALSE	FALSE	FALSE	FALSE	FALSE	FALSE	FALSE	1193	1	Autres diagnostics	2014-02-21	Traitement médico-chirurgical	FALSE	FALSE	TRUE	FALSE	FALSE	FALSE	TRUE	FALSE	TRUE	FALSE	FALSE	TRUE	FALSE	FALSE
HGR de Bumbu	Quartiers excentriques et d'extension	2015-02-10	Quartiers excentriques et d'extension	24		Patiente venue d'elle même			2014-02-27	2014-02-27 14:45:00	36	90	2	60	1		0	80	FALSE	FALSE	FALSE	TRUE	FALSE	FALSE	FALSE	FALSE	FALSE	FALSE	FALSE	FALSE	1194	1	Autres diagnostics	2014-02-27	Traitement médico-chirurgical	FALSE	FALSE	TRUE	FALSE	FALSE	FALSE	TRUE	FALSE	TRUE	FALSE	FALSE	TRUE	FALSE	FALSE
HGR de Bumbu	Quartiers excentriques et d'extension	2015-02-10	Quartiers des cités planifiées	30		Patiente venue d'elle même			2014-03-16	2014-03-16 06:40:00	36	150	1	90	0		0	80	FALSE	FALSE	FALSE	FALSE	TRUE	FALSE	FALSE	FALSE	FALSE	FALSE	FALSE	FALSE	1195	1	Autres diagnostics	2014-03-16	Traitement médico-chirurgical	FALSE	FALSE	TRUE	FALSE	FALSE	FALSE	TRUE	FALSE	TRUE	FALSE	FALSE	TRUE	FALSE	FALSE
HGR de Bumbu	Quartiers excentriques et d'extension	2015-02-10	Quartiers excentriques et d'extension	28		Patiente venue d'elle même			2014-05-27	2014-05-27 14:20:00	36.6	120	3	80	2		0	80	FALSE	FALSE	FALSE	FALSE	FALSE	FALSE	FALSE	FALSE	FALSE	FALSE	FALSE	FALSE	1196	1	Autres diagnostics	2014-05-27	Traitement médico-chirurgical	FALSE	FALSE	FALSE	FALSE	FALSE	FALSE	FALSE	FALSE	FALSE	FALSE	FALSE	FALSE	FALSE	FALSE
HGR de Bumbu	Quartiers excentriques et d'extension	2015-02-10	Quartiers excentriques et d'extension	25		Patiente référée	Quartiers excentriques et d'extension	2014-04-26	2014-04-26	2014-04-26 00:30:00		140	1	60	0		0		FALSE	FALSE	FALSE	FALSE	TRUE	FALSE	FALSE	FALSE	FALSE	FALSE	FALSE	FALSE	1197	1	Autres diagnostics	2014-04-26	Traitement médico-chirurgical	FALSE	FALSE	FALSE	FALSE	FALSE	FALSE	FALSE	FALSE	FALSE	FALSE	FALSE	FALSE	FALSE	FALSE
HGR de Bumbu	Quartiers excentriques et d'extension	2015-02-10	Quartiers des cités planifiées	37		Patiente venue d'elle même			2014-05-11	2014-05-11 01:25:00	36	140	5	100	1		3	78	FALSE	FALSE	FALSE	FALSE	TRUE	FALSE	FALSE	FALSE	FALSE	FALSE	FALSE	FALSE	1198	1	Autres diagnostics	2014-05-11	Traitement médico-chirurgical	FALSE	FALSE	FALSE	FALSE	FALSE	FALSE	FALSE	FALSE	FALSE	FALSE	FALSE	FALSE	FALSE	FALSE
HGR de Bumbu	Quartiers excentriques et d'extension	2015-02-10		32		Patiente référée		2014-04-25	2014-04-25	2014-04-25 21:00:00			5		4		0		FALSE	FALSE	FALSE	TRUE	FALSE	FALSE	FALSE	FALSE	FALSE	FALSE	FALSE	FALSE	1199	1	Autres diagnostics		Traitement médico-chirurgical	TRUE	FALSE	FALSE	FALSE	FALSE	FALSE	TRUE	FALSE	TRUE	FALSE	FALSE	TRUE	FALSE	FALSE
HGR de Bumbu	Quartiers excentriques et d'extension	2015-02-10	Quartiers excentriques et d'extension	21	Mariée	Patiente venue d'elle même			2014-04-29	2014-04-29 00:30:00	36.5		1		0		0		FALSE	FALSE	FALSE	FALSE	FALSE	FALSE	FALSE	FALSE	FALSE	FALSE	FALSE	FALSE	1200	1	Autres diagnostics	2014-04-29	Traitement médico-chirurgical	FALSE	FALSE	TRUE	FALSE	FALSE	FALSE	TRUE	FALSE	TRUE	FALSE	FALSE	FALSE	FALSE	FALSE
HGR de Bumbu	Quartiers excentriques et d'extension	2015-02-10		40		Patiente venue d'elle même			2014-01-23	2014-01-23 09:38:00	36.3	70	1	20	0		1		FALSE	FALSE	FALSE	FALSE	FALSE	FALSE	FALSE	FALSE	FALSE	FALSE	FALSE	TRUE	1201	1	Autres diagnostics	2014-01-23	Traitement médico-chirurgical	FALSE	TRUE	TRUE	FALSE	FALSE	FALSE	FALSE	FALSE	FALSE	TRUE	FALSE	TRUE	FALSE	FALSE
HGR de Bumbu	Quartiers excentriques et d'extension	2015-02-10	Quartiers excentriques et d'extension	40		Patiente venue d'elle même			2014-04-06	2014-04-06 06:30:00	36		4		3		0	80	FALSE	FALSE	FALSE	TRUE	FALSE	FALSE	FALSE	FALSE	FALSE	TRUE	FALSE	FALSE	1202	1	Autres diagnostics	2014-04-06	Traitement médico-chirurgical	FALSE	TRUE	TRUE	FALSE	FALSE	FALSE	TRUE	FALSE	TRUE	FALSE	FALSE	FALSE	FALSE	FALSE
HGR de Bumbu	Quartiers excentriques et d'extension	2015-02-10	Quartiers excentriques et d'extension	16	Mariée	Patiente venue d'elle même			2014-06-08	2014-06-08 03:30:00	37	120	2	80	1		0	80	FALSE	FALSE	FALSE	FALSE	FALSE	FALSE	FALSE	FALSE	TRUE	FALSE	FALSE	FALSE	1203	1	Autres diagnostics	2014-06-08	Traitement médico-chirurgical	TRUE	FALSE	FALSE	FALSE	FALSE	FALSE	TRUE	FALSE	TRUE	FALSE	FALSE	TRUE	FALSE	FALSE
HGR de Bumbu	Quartiers excentriques et d'extension	2015-02-10	Quartiers excentriques et d'extension	37		Patiente venue d'elle même			2014-05-15	2014-05-15 18:30:00	36	110	9	60	7		1	80	FALSE	FALSE	FALSE	TRUE	FALSE	FALSE	FALSE	FALSE	FALSE	FALSE	FALSE	FALSE	1204	1	Autres diagnostics		Traitement médico-chirurgical	FALSE	FALSE	TRUE	FALSE	FALSE	FALSE	TRUE	FALSE	FALSE	TRUE	FALSE	TRUE	FALSE	FALSE
HGR de Bumbu	Quartiers excentriques et d'extension	2015-02-10	Quartiers excentriques et d'extension	31		Patiente venue d'elle même			2014-05-26	2014-05-26 20:30:00	36.2	100	4	60	3		0		FALSE	FALSE	FALSE	FALSE	FALSE	FALSE	FALSE	FALSE	TRUE	FALSE	FALSE	FALSE	1205	1	Autres diagnostics	2014-05-26	Traitement médico-chirurgical	FALSE	FALSE	FALSE	FALSE	TRUE	FALSE	TRUE	FALSE	TRUE	TRUE	FALSE	TRUE	FALSE	FALSE
HGR de Bumbu	Quartiers excentriques et d'extension	2015-02-10	Quartiers excentriques et d'extension	32		Patiente venue d'elle même			2014-06-24	2014-06-24 13:00:00	36	100	4	60	3		0	78	FALSE	FALSE	FALSE	TRUE	FALSE	FALSE	FALSE	FALSE	TRUE	FALSE	FALSE	FALSE	1206	1	Autres diagnostics	2014-06-24	Traitement médico-chirurgical	FALSE	FALSE	TRUE	FALSE	FALSE	FALSE	TRUE	FALSE	TRUE	FALSE	FALSE	TRUE	FALSE	FALSE
HGR de Bumbu	Quartiers excentriques et d'extension	2015-02-10	Quartiers excentriques et d'extension	26		Patiente référée	Quartiers excentriques et d'extension	2014-06-28	2014-06-28	2014-06-28 05:00:00		100	1	60	0		0		FALSE	FALSE	FALSE	FALSE	FALSE	FALSE	FALSE	FALSE	FALSE	FALSE	FALSE	FALSE	1207	1	Autres diagnostics	2014-06-28	Traitement médico-chirurgical	FALSE	FALSE	TRUE	FALSE	FALSE	FALSE	TRUE	FALSE	TRUE	FALSE	FALSE	FALSE	TRUE	FALSE
HGR de Bumbu	Quartiers excentriques et d'extension	2015-02-10		28		Patiente venue d'elle même			2014-05-03	2014-05-03 04:30:00	36	100	3	60	2		0		FALSE	FALSE	FALSE	TRUE	FALSE	FALSE	FALSE	FALSE	FALSE	FALSE	FALSE	FALSE	1208	1	Autres diagnostics	2014-05-03	Traitement médico-chirurgical	FALSE	FALSE	TRUE	FALSE	FALSE	FALSE	TRUE	FALSE	TRUE	FALSE	FALSE	TRUE	FALSE	FALSE
HGR de Bumbu	Quartiers excentriques et d'extension	2015-02-13		42	Mariée	Patiente référée		2014-11-06	2014-11-07			110	11	80	10		0	104	FALSE	FALSE	FALSE	FALSE	FALSE	FALSE	FALSE	FALSE	TRUE	FALSE	FALSE	FALSE	1209	1	Autres diagnostics	2014-11-08	Traitement médico-chirurgical	FALSE	FALSE	FALSE	FALSE	TRUE	FALSE	TRUE	FALSE	TRUE	FALSE	FALSE	TRUE	FALSE	FALSE
HGR de Bumbu	Quartiers excentriques et d'extension	2015-03-13	Quartiers excentriques et d'extension	32		Patiente venue d'elle même			2014-01-04										TRUE	FALSE	FALSE	FALSE	FALSE	FALSE	FALSE	FALSE	FALSE	FALSE	FALSE	FALSE	1210	1	Complication d'avortement provoqué	2014-01-04	Traitement médico-chirurgical	FALSE	FALSE	FALSE	FALSE	FALSE	FALSE	FALSE	FALSE	FALSE	FALSE	FALSE	FALSE	FALSE	FALSE
HGR de Bumbu	Quartiers excentriques et d'extension	2015-03-13	Quartiers excentriques et d'extension	30		Patiente venue d'elle même			2014-01-04										TRUE	FALSE	FALSE	FALSE	FALSE	FALSE	FALSE	FALSE	FALSE	FALSE	FALSE	FALSE	1211	1	Complication d'avortement provoqué	2014-01-04	Traitement médico-chirurgical	FALSE	FALSE	FALSE	FALSE	FALSE	FALSE	FALSE	FALSE	FALSE	FALSE	FALSE	FALSE	FALSE	FALSE
HGR de Bumbu	Quartiers excentriques et d'extension	2015-03-13	Quartiers excentriques et d'extension			Patiente venue d'elle même			2014-01-01										TRUE	FALSE	FALSE	FALSE	FALSE	FALSE	FALSE	FALSE	FALSE	FALSE	FALSE	FALSE	1212	1	Complication d'avortement provoqué	2014-01-01	Traitement médico-chirurgical	FALSE	FALSE	TRUE	FALSE	FALSE	FALSE	FALSE	FALSE	FALSE	FALSE	FALSE	FALSE	FALSE	FALSE
[truncated: 12 more columns]
